1 **Revealing the microbial heritage of traditional Brazilian cheeses through metagenomics**

2 Caroline Isabel Kothe<sup>a\*</sup>, Nacer Mohellibi<sup>a</sup>, Pierre Renault<sup>a\*</sup>

3

4 <sup>a</sup> Université Paris-Saclay, INRAE, AgroParisTech, Micalis Institute, 78350 Jouy-en-Josas,  
5 France.

6

7 \*Corresponding authors: C. I. Kothe. INRAE, Micalis Institute, Domaine de Vilvert, 78350  
8 Jouy-en-Josas. E-mail: [carolkothe@hotmail.com](mailto:carolkothe@hotmail.com)

9 P. Renault. INRAE, Micalis Institute, Domaine de Vilvert, 78350 Jouy-en-Josas. E-mail:  
10 [Pierre.Renault.2@inrae.fr](mailto:Pierre.Renault.2@inrae.fr)

11

12 **Abstract**

13 Brazilian artisanal cheeses date from the first Portuguese settlers and evolved via local  
14 factors, resulting in unique products that are now part of the patrimony and identity of  
15 different Brazilian regions. In this study, we combined several culture-independent  
16 approaches, including 16S/ITS metagenetics, assembly- and deep profiling-metagenomics to  
17 characterize the originality of the microbiota of five varieties of Brazilian artisanal cheeses  
18 from the South and Southeast regions of Brazil. Their core microbiota contained mainly lactic  
19 acid bacteria (LAB), of which *Lactococcus lactis* subsp. *lactis* was the most frequent,  
20 followed by *Streptococcus thermophilus* in the South region. Moreover, several samples from  
21 the Southeast region contained, as dominant LAB, two other food Streptococci belonging to a  
22 new species of the *salivarius* group and *S. infantarius*. Rinds of samples from the Southeast  
23 region were dominated by the halotolerant bacterium *Corynebacterium variabile* and the  
24 yeasts *Diutina catenulata* and, to a lesser extent, by *Debaryomyces hansenii* and *Kodamaea*  
25 *ohmeri*. Rinds from the South region contained mainly LAB due to their short ripening time,  
26 and the predominant yeast was *D. hansenii*. Phylogenomic analysis based on *L. lactis*  
27 metagenome-assembled genomes (MAGs) showed that most Brazilian strains are closely  
28 related and form a different clade from those whose genomes are available at this time,  
29 indicating that they belong to a specific group. Lastly, functional analysis showed that *S.*  
30 *infantarius* acquired a ~26 kb DNA fragment from *S. thermophilus* starter strains that carry  
31 the LacSZ system, allowing fast lactose assimilation, an adaptation advantage for growth in  
32 milk. Finally, our study identified several areas of concern, such as the presence of somatic  
33 cell DNA and high levels of antibiotic resistance genes in several cheese microbiota, implying  
34 that the milk used was from diseased herds. Overall, the data from this study highlight the  
35 potential value of the traditional and artisanal cheese production network in Brazil, and  
36 provide a metagenomic-based scheme to help manage this resource safely.

37

38 **Keywords:** microbial diversity, microbial ecology, fermented food, artisanal cheese,  
39 metagenome-assembled genomes, genomics, LAB.

40

## 41 **1 Introduction**

42 Beyond their historical, socio-economic and cultural aspects, artisanal fermented foods  
43 have recently received increased attention as potential sources of biological resources that can  
44 provide both technological and health benefits. Among them, traditional cheeses worldwide  
45 contain rich natural microbiota that improve the quality of cheese production in terms of  
46 flavor, texture and safety aspects (Montel et al., 2014; Walsh, Macori, Kilcawley, & Cotter,  
47 2020). This is also true for emerging countries where dairies have more recently appeared.

48 There are few reports on the colonization of cheese in Brazil. Some studies have  
49 suggested that the potential origin of Brazilian dairy products traces back to the "discovery"  
50 of the country in 1581 when Portuguese settlers arrived with their cattle and passed on cheese  
51 production techniques to the local population (Borelli, Lacerda, Penido, & Rosa, 2016; Penna,  
52 Gigante, & Todorov, 2021). Although cheese production in Brazil was based on European  
53 practices, factors such as climate, farm organization, feed, breed of dairy animals, quality of  
54 raw milk and indigenous microbiota resulted in unique products that are now part of the  
55 patrimony and identity of different Brazilian regions (Kamimura, Magnani, et al., 2019;  
56 Penna et al., 2021). There are more than 30 varieties of artisanal cheeses produced in micro-  
57 regions of the Southeast (Araxá, Campo das Vertentes, Cerrado, Canastra and Serro), South  
58 (Colonial and Serrano), Center (Caipira), North (Marajó) and Northeast (Butter and Curd)  
59 regions of the country (Kamimura, Magnani, et al., 2019). Recent studies have shown that  
60 these local cheeses are potential sources of lactic acid bacteria (LAB) that can be used for the  
61 development of starter cultures (Cabral et al., 2016; Margalho et al., 2020). It could thus be

62 interesting to more widely explore the biodiversity of these artisanal products whose  
63 microbiota may have evolved separately from the well-studied Western cheeses. These data  
64 would be valuable to more effectively develop them as biological resources, ensure their  
65 safety and facilitate their preservation, as well as to support the development of technical  
66 regulations and maintain their historical and cultural footprint.

67         Several studies have focused on the microbiological characterization of Brazilian  
68 artisanal cheeses using culture-dependent methods (Lima, Lima, Cerqueira, Ferreira, & Rosa,  
69 2009; Luiz et al., 2016; Perin, Sardaro, Nero, Neviani, & Gatti, 2017; Pontarolo et al., 2017;  
70 Resende et al., 2011). However, these techniques do not provide a complete picture of the  
71 existing microbiota since several species are poorly cultivable or require appropriate culture  
72 media. Recently, Kamimura *et al.* (2019) (Kamimura, De Filippis, Sant’Ana, & Ercolini,  
73 2019) conducted a pioneering study using culture-independent methods in Brazilian cheeses.  
74 Using 16S rRNA sequencing, they characterized the bacterial diversity of a wide number of  
75 artisanal cheeses from different regions of Brazil at the genus level. They mainly identified  
76 LAB of the genera *Enterococcus*, *Lactobacillus*, *Lactococcus*, *Leuconostoc* and  
77 *Streptococcus*, as well as some probable contaminants such as *Enterobacteriaceae* and  
78 *Staphylococcus*. However, these studies seem to focus on the core microbiota, leaving the rind  
79 microbiota unknown, whereas it may harbor halotolerant and halophilic bacteria and yeasts,  
80 which are key actors in cheese ecology and technology (Banjara, Suhr, & Hallen-Adams,  
81 2015; E. Dugat-Bony et al., 2016; Kothe et al., 2021; Wolfe, Button, Santarelli, & Dutton,  
82 2014). Finally, the 16S gene analysis does not provide functional data or detailed taxonomic  
83 information that make it possible to uncover the original characteristics of their microbiota.

84         Consequently, there are still many unanswered questions concerning these artisanal  
85 Brazilian cheeses that would require deeper investigation, including species- and even strain-  
86 level analysis, for yeasts as well, and that target the specific microbiota of the rind and the

87 core. While metagenetics allows a rapid identification at the genus level, other meta-omic  
88 approaches such as shotgun metagenomics may provide a more accurate microbiota level of  
89 analysis. In this study, we focused our analyses on cheeses from two Brazilian regions (South  
90 and Southeast) and combined 16S rRNA and ITS metagenetic analysis with shotgun  
91 metagenomic analysis in order to reveal their specificities at the level of species composition  
92 and strain origin, and to highlight functional features of interest. These data could be a benefit  
93 to market expansion, ensuring the protection of historical and sanitary aspects, in addition to  
94 supporting the development of technical regulations, legislation and standardization  
95 parameters for the different types of traditional Brazilian cheeses.

96

## 97 **2 Methodology**

### 98 *2.1 Sample collection and DNA extraction*

99 A total of 23 artisanal cheeses were obtained from Southeast and South Brazil from  
100 five varieties: Araxá, Canastra, Serro, Colonial and Serrano. Samples were collected from  
101 local producers, artisan markets and fairs, and sent by post to France. The rinds were  
102 separated from the cores using sterile knives, and both fractions were analyzed to obtain a  
103 more detailed overview of the microbial diversity of those cheeses. The samples were diluted  
104 1:1 (w/v) in guanidinium thiocyanate 4M solution (Sigma-Aldrich, USA) with Tris-HCl  
105 0.1M, and mixed in an Ultra Turrax T25 (Labortechnik) at 8,000 rpm for 2 min. A 10% N-  
106 lauryl sarcosine solution (Sigma-Aldrich, USA) was added to the mixture, vortexed and  
107 centrifuged at 4°C and 14,000 rpm for 30 min. The fat and supernatant were eliminated and  
108 the pellet was used for DNA extraction using the protocol described by Almeida *et al.* (2014)  
109 (Almeida et al., 2014). DNA quality was visualized on 0.8% agarose gel and the  
110 quantification was measured with a Qubit 2.0 fluorometer (Life Technologies) using a Qubit  
111 dsDNA HS (High Sensitivity) Assay Kit.

112

## 113 *2.2 Metagenetic analyses*

114 Bacterial diversity was analyzed by sequencing the amplified region V3-V4 of the 16S  
115 rRNA gene using primers V3F (5'-ACGGRAGCWGCAGT-3') and V4R (5'-  
116 TACCAGGGTATCTAATCCT-3'). Additionally, fungal diversity was evaluated in rinds  
117 using ITS3 (5'-GCATCGATGAAGAACGCAGC-3') and ITS4 (5'-  
118 TCCTCCGCTTWTGWTWTGC-3') primers. The PCR was performed with MTP Taq DNA  
119 Polymerase (Sigma-Aldrich, USA), and the cycling conditions were: 94°C for 1 min,  
120 followed by 30 cycles of amplification at 94°C for 1 min, 65°C for 1 min, and 72°C for 1 min,  
121 with a final extension step of 10 min at 72°C. The sequencing was performed with a V3  
122 Illumina MiSeq kit, as described in Poirier *et al.* (2018) (Poirier et al., 2018).

123 The quality of the raw data was evaluated with FastQC (Wingett & Andrews, 2018)  
124 and the sequences were imported into the FROGS pipeline (Escudié et al., 2018) to obtain the  
125 Operational Taxonomic Units (OTUs). The sequences were filtered by length (150–500 bp)  
126 and then pooled into OTUs with SWARM (Mahe, Rognes, Quince, de Vargas, & Dunthorn,  
127 2014) with the distance parameter of 3. Chimeras were removed with VSEARCH (Rognes,  
128 Flouri, Nichols, Quince, & Mahe, 2016) and OTUs with at least 0.01% in the whole dataset  
129 were retained. The OTUs were affiliated with SILVA 132 SSU databases (Quast et al., 2013)  
130 for bacteria and UNITE 8.2 for fungi (<https://unite.ut.ee/>). Alpha-diversity and beta-diversity  
131 analyses were performed in R Studio v.3.6.1 using the phyloseq and ggplot2 packages  
132 (v1.30.0) (McMurdie & Holmes, 2013; Poirier et al., 2018).

133

## 134 *2.3 Taxonomic composition by shotgun metagenomics*

135 The DNA of 15 cheese samples was sequenced using Illumina HiSeq2500 technology  
136 at GATC-Biotech (Konstanz, Germany), which yielded between six and eight million paired-

137 end reads of 150-nucleotide length. Metagenomic reads corresponding to the *Bos taurus*  
138 genome were filtered with Bowtie2 (Langmead & Salzberg, 2012) and visualized with  
139 Samtools flagstat (H. Li et al., 2009). From the generated fastq files, we first estimated  
140 microbial composition by mapping the samples reads against the representative clade-specific  
141 marker catalogue contained in the MetaPhlAn tool, v.3.0.4 (Truong et al., 2015).

142 Additionally, we performed taxonomic profiling using an assembly-based marker gene  
143 analysis, which allows non-supervised binning of metagenomes. To do this, the reads were  
144 trimmed for quality and *de novo* assembly was performed using metaSPAdes, v.3.9  
145 (Bankevich et al., 2012). Genes were then predicted using Prodigal (v.2.6.3) and marker genes  
146 were extracted using fetchMG, v.1.0 (Ciccarelli et al., 2006; Sunagawa et al., 2013). We  
147 chose to perform our taxonomic assignments by using the *ychF* marker gene, whose closest  
148 homologue was assigned by a blastp search on all the available sequences from the NCBI  
149 protein database. Summary species composition plots were created in R (v.3.6.1) using the  
150 ggplot2 package, v.3.3.2. Finally, phylogenetic analyses were performed with the *ychF*  
151 proteins identified using ClustalX 2.1 (Thompson, Gibson, Plewniak, Jeanmougin, & Higgins,  
152 1997) and MEGA7 (Kumar, Stecher, & Tamura, 2016) with the Neighbor-Joining method  
153 (Saitou & Nei, 1987) and 1,000 bootstrap replicates (Felsenstein, 1985).

154

#### 155 2.4 Metagenome-assembled genome (MAG) analyses

156 Genome binning was performed using MetaBAT2-2.12.1 (Kang, Froula, Egan, & Wang,  
157 2015), with a minimum contig size of 1,500 nucleotides and the default settings. The quality  
158 of the resulting prokaryotic bins was assessed with CheckM (Parks, Imelfort, Skennerton,  
159 Hugenholtz, & Tyson, 2015), and MAGs < 80% completeness and/or > 10% contamination  
160 were excluded. For eukaryotes, we considered those bins that aligned with > 60% of their  
161 sequence length to fungal reference genomes from GenBank as MAGs of quality.

162 In addition, MAG assemblies were performed for Streptococcal species by additional  
163 binning, such as blastn analysis with reference genomes of related species. Contigs were then  
164 filtered by percentage of the length covered, identity and coverage levels. Finally, manual  
165 curing of questionable contigs (new, low coverage of homology on references, etc.) were  
166 performed by blastn and blastx analysis against nr/nt and nr NCBI databases, respectively.

167

## 168 2.5 Phylogenomic and functional analyses

169 The Automatic Multi-Locus Species Tree web server  
170 (<https://automlst.ziemertlab.com/>) (Alanjary, Steinke, & Ziemert, 2019) was used to  
171 determine closely related genomes based on core gene alignments of the recovered MAGs.  
172 The closest species were inferred based on the percentage of average nucleotide identity  
173 (ANI) calculated using FastANI, v.1.31 (Jain, Rodriguez-R, Phillippy, Konstantinidis, &  
174 Aluru, 2018).

175 kSNP (v.3.0) was used to perform the phylogenomic analysis for the *Lactococcus*  
176 *lactis* species (Gardner, Slezak, & Hall, 2015), with the maximum likelihood option and  
177 kmer size of 21. A total of 225 genomes of the *Lactococcus lactis* species were downloaded  
178 from Genbank and combined with our MAG to compute this analysis.

179 The search for antibiotic resistance (ABR) genes was performed by read mapping  
180 against the CARD database (Jia et al., 2017; McArthur et al., 2013) using the PATRIC web  
181 server (Antonopoulos et al., 2019). The presence of particular genes in reference genomes,  
182 such as virulence factors, ABR and genes of technological interest, was determined using the  
183 FoodMicrobiome tool (<https://migale.jouy.inra.fr/foodMicrobiome/>; (Kothe et al., 2021). This  
184 tool performs read mapping on given reference genomes and provides read counts for each  
185 annotated gene. Additionally, this tool was used to detect, with high sensitivity and reliability,



186 the subdominant populations of given species by analyzing the distribution of metagenomic  
187 reads on reference genomes of these species.

188

## 189 *2.6 Data availability*

190 Raw sequences of amplification of 16S rRNA and ITS genes and raw metagenomic  
191 reads were deposited on the European Nucleotide Archive (ENA) under the BioProject ID  
192 PRJNA693797. The MAGs are available in:  
193 <https://data.mendeley.com/datasets/4w8w9mkfjy/1>

194

## 195 **3 Results**

### 196 *3.1 Sample descriptions*

197 A total of 23 artisanal cheeses were obtained from the Southeast and South regions of  
198 Brazil from five varieties: Araxá, Canastra, Serro, Colonial and Serrano (**Fig. 1**). The cheeses  
199 were produced with raw milk, except C-19, and the samples were collected from local  
200 producers, artisan markets and fairs (**Table S1**). These five cheese varieties are defined as  
201 semi-fat to fat (25-59.9% of fat) and semi-hard cheeses (humidity 36-45.9%) (de Medeiros  
202 Carvalho, de Fariña, Strongin, Ferreira, & Lindner, 2019; MAPA, 2020; RS, 2016). The  
203 differences in the production process and characteristics of each type of cheese are briefly  
204 described in **Supplementary Data 1**.

205

### 206 *3.2 Taxonomic diversity of Brazilian cheeses using amplicon sequencing approaches*

207 The bacterial diversity present in the core and the rind of the 23 Brazilian cheeses was  
208 assessed using amplicon sequencing targeting the 16S rRNA gene. The sequences were  
209 clustered in 100 bacterial OTUs whose taxonomic assignment was possible up to the species  
210 level in the majority of the cases (**Table S2**). The C-02 sample was discarded due to its low

211 read depth. For the majority of other samples, the rarefaction curves reached the saturation  
212 plateau, indicating that the sequencing depth was sufficiently recovered (**Fig. S1**).

213 The alpha-diversity analysis for core samples showed greater observed richness of  
214 bacterial species ( $p < 0.01$ ) in the South samples compared to the Southeast samples (**Fig.**  
215 **2A**). However, the bacterial evenness measured by Shannon and inverse Simpson indices  
216 showed that the diversity of species in both regions was quite similar ( $p > 0.05$ ). The Principal  
217 Coordinates Analysis (PCoA) and clustering showed the diversity among the samples, and we  
218 observed that the majority of cheese cores from the two regions shared a common bacterial  
219 microbiota (**Fig. 2A**). Nevertheless, the samples C-08 and C-10 from the Araxá micro-region  
220 contain microbiota that is different from the other samples but similar between them, and C-  
221 22 belongs to a particular group. Indeed, the taxonomic composition showed that LAB  
222 constitute the major part of core sample microbiota with *Lactococcus lactis* and *Streptococcus*  
223 *thermophilus-salivarius* as the dominant species (over 50% of the reads) in 14 and five  
224 samples, respectively, while a *Streptococcus* from the *equinus-lutetiensis-infantarius* complex  
225 is dominant in the C-08 and C-10 samples (**Fig. 3A**). Additionally, in the core of the C-22  
226 sample, we observed the predominance (~79.5%) of the enterobacteria *Kluyvera*  
227 *cryocrescens*, while *S. thermophilus* was present at only low levels (4.6%). Finally, several  
228 other LAB species were less abundant, such as *Levilactobacillus brevis*, *Lacticaseibacillus*  
229 *casei*, *Lb. delbrueckii*, *Lactiplantibacillus plantarum*, *L. piscium*, *Lc. mesenteroides*, as well  
230 as undefined species of *Streptococcus* and *Lactococcus* (**Fig. 3A**).

231 Concerning bacterial richness and evenness of the rind samples, no statistical  
232 differences were observed based on the observed species and Shannon and Simpson diversity  
233 indices ( $p > 0.05$ , **Fig. 2B**). The PCoA and hierarchical clustering mainly showed two  
234 different groups of microbiota: one composed only of samples from the Southeast and another  
235 with cheeses from both regions. The taxonomic composition showed that the majority of

236 cheese rinds from the South displayed the same dominant species as their core (seven out of  
237 nine), whereas those from the Southeast region are dominated by *Corynebacterium variabile*  
238 (eight out of 14) (**Fig. 3B**). The two divergent samples from the South, C-R20 and C-R22,  
239 were dominated by high levels of *Celerinatantimonas sp.* and *Cobetia marina*, respectively.  
240 Finally, four of the divergent rind samples from the Southeast had a composition closer to that  
241 of the core (C-R01, C-R05, C-R10 and C-R12), and the last two, C-R06 and C-R14, were  
242 dominated by *Enterobacteriaceae* species and an undefined *Brevibacterium* species,  
243 respectively (**Fig. 3B**).

244 Furthermore, *S. aureus* and *E. coli* species, which may have pathogenic strains, were  
245 detected in more than 45% of core samples and more than 35% of rinds at levels > 0.01%.  
246 The highest levels were detected in C-14 (which represented 2.86% of *S. aureus*) and C-20  
247 samples (with 3.45% of *E. coli*) (**Fig. 3A**).

248 Concerning eukaryotic diversity, ITS amplification was successful for 17 rind  
249 samples, and the sequences were grouped into 34 yeast/fungal OTUs (**Table S2**). The alpha  
250 diversity analyses did not show statistical differences between the South and Southeast  
251 regions ( $p > 0.05$ ). The beta-diversity analysis showed two groups, the first one consisting  
252 mainly of samples from the South, except C-R05, and the second one of samples from the  
253 Southeast (SE), except C-R16 (**Fig. 2C**). Taxonomical analysis of the ITS indicated the  
254 predominance of different fungal/yeast species between South and SE cheeses (**Fig. 3C**).  
255 Using a threshold of > 5% of read abundance, *Debaryomyces hansenii* was present in all  
256 South cheese rinds (n=6), but only in five from SE cheeses (45%). Conversely, the dominant  
257 yeast in SE cheeses was *Diutina catenulata*, which was present in nine samples at levels >  
258 5%, and in only one South cheese. Moreover, several additional species were detected mainly  
259 in SE cheeses, such as *Kodamaea ohmeri*, *G. candidum*, *Trichosporon sp.* and *Moniliella sp.*,

260 and in South cheeses, such as *Penicillium commune*, *Clavispora lusitaniae* and *Candida*  
261 *zeynaloides*.

262

### 263 3.3 Refined microbiota by metagenomics

264 In order to more precisely analyze the microbiota from our samples, we selected six  
265 and nine samples of cores and rinds, respectively, to perform shotgun metagenomic analyses.  
266 Such analyses allow a taxonomic identification up to strain level and the simultaneous  
267 assessment of the level of reads corresponding to bacteria and fungi. Moreover, it makes it  
268 possible to detect eventual virulence factors in pathogenic species, as well as antibiotic  
269 resistance genes and genes of technological interest.

270

#### 271 3.3.1 Species level analyses

272 Metagenomic samples often contain animal reads, which may significantly bias the  
273 analysis when they are in great abundance. In the present samples, we detected *Bos taurus*  
274 reads at levels ranging from 0.1 to 76% (**Table S3**). We observed that cow reads were notably  
275 higher in the core samples, especially C-15, C-18 and C-20 from the South region, where they  
276 accounted for more than 30%.

277 The taxonomical composition of the 15 cheese metagenomes was first determined  
278 using MetaPhlAn, which yielded 128 bacterial and one fungal species (**Table S4**). Species  
279 composition obtained by this analysis is relatively in accordance with those obtained with 16S  
280 rRNA amplicon for species present at abundance levels > 1%. Interestingly, it resolved  
281 several taxonomical assignments such as that of *Streptococcus equinus-lutetiensis-infantarius*,  
282 which becomes *S. infantarius* and appears to be the dominant LAB in two Araxá cheeses (**Fig.**  
283 **3A**). It also detected several species present at significant levels such as *Corynebacterium*  
284 *variabile*, *Staphylococcus saprophyticus*, *Brachybacterium alimentarium*,  
285 *Acidipropionibacterium acidipropionici*, *Brevibacterium linens* and *S. parauberis*.

286 Conversely, it did not detect two possibly abundant bacteria, an uncharacterized  
287 *Brevibacterium* sp. and *Providencia rettgeri* in C-R14 and C-R06, respectively. Moreover, it  
288 detected only one yeast (*Candida parapsilosis*) in our metagenome set, whereas ITS amplicon  
289 analysis showed large fungal diversity, indicating a probable lack of corresponding genome  
290 references in the database currently available from MetaPhlAn.

291 In order to characterize microbiota independently of fixed references, we applied a  
292 marker gene analysis from the assembled metagenomes, which yielded 57 bacterial and seven  
293 fungal species (**Table S4**); the overall composition is shown in **Fig. 4**. Although the results  
294 are consistent with the previous analysis made by read profiling, some differences merit  
295 highlighting. In particular, 14 species whose relative abundance ranges from 3 to 37% were  
296 detected uniquely by the marker analysis, probably due to their absence in the currently  
297 implemented MetaPhlAn database. Among bacteria of potential technological interest, it  
298 revealed *Lactocaseibacillus paracasei* and two potential new species of *Brevibacterium* and  
299 one of *Microbacterium*. Moreover, this analysis suggested that while the *S. thermophilus-*  
300 *salivarius* populations detected in the South samples belong to *S. thermophilus*, those detected  
301 in the Southeast samples are instead related to another species of the *salivarius* group (**Table**  
302 **S4, Fig. S2**). Indeed, their sequence of the well-conserved *ychF* gene displays more than 5%  
303 nucleotidic divergence with those of the other species of the *S. salivarius* group, suggesting  
304 that they belong to a new species. Finally, we detected seven species of yeasts, *Debaryomyces*  
305 *hansenii*, *Diutina catenulata*, *Kodamaea ohmeri*, *Geotrichum candidum*, *Kluyveromyces*  
306 *lactis* and two other Saccharomycetales. We also identified the proportions of prokaryotes and  
307 eukaryotes in the samples; yeasts appear to be absent in the core samples, and range from 0 to  
308 27% in the rinds.  
309

### 310 3.3.2 MAGs and strain-level analyses

311 A total of 54 prokaryotic and 10 eukaryotic metagenome-assembled genomes (MAGs)  
312 of high quality were reconstituted from the metagenome assemblies (**Table S5**). They include  
313 27 prokaryotic and four eukaryotic species. The majority of bacterial MAGs correspond to *L.*  
314 *lactis* subsp. *lactis* (10) and *C. variabile* (8). Moreover, eight MAGs represent six potential  
315 novel species since they have less than 95% average nucleotide identity (ANI) with reference  
316 genomes (**Table S5, Fig. S3**). They also include species of the genera *Brevibacterium* (2),  
317 *Streptococcus*, *Corynebacterium*, *Lactobacillus* and *Microbacterium*. Additionally, one MAG  
318 that belongs to the *Micrococcaceae* family could not be identified at the genus level since it  
319 does not share ANI > 80% with any reference genome.

320 Further detailed analysis was performed with the Lactococcal and Streptococcal  
321 MAGs, which correspond to key species of starter bacteria. Phylogenomic analysis of the *L.*  
322 *lactis* MAGs was performed with 215 reference genomes of this species, representing strains  
323 from its two main subspecies (*lactis* and *cremoris*) and isolated from different environments  
324 (dairy, vegetable, animal, etc.) (**Fig. S4**). This showed that nine of the Brazilian cheese MAGs  
325 form a homogeneous group whose most closely related strains are *L. lactis* subsp. *lactis*  
326 isolated from various traditional dairy products around the world. Although several strains of  
327 this group are referenced at NCBI as belonging to the diacetylactis biovariant, they all lack  
328 the citrate lyase complex (*mae-citRCDEFXG*) involved in the production of diacetyl from  
329 citrate, and they are phylogenetically distant from the diacetylactis group. Additionally, the *L.*  
330 *lactis* MAG originating from the C-R02 sample is clustered with another *L. lactis* subsp. *lactis*  
331 group containing mostly industrial dairy starter strains. A search for the genes encoding the  
332 Lac-PTS system (ten genes) and PrtP that allow rapid lactose assimilation and casein  
333 breakdown in Lactococci, respectively, were found in all metagenomes at levels similar to or  
334 slightly higher than chromosomal Lactococcal genes (**Table S6**).

335           Concerning *Streptococcus*, six MAGs were built, and ANI analyses showed that they  
336 may belong to three species (**Table S5**). A first group of three MAGs belong to *S.*  
337 *thermophilus* species (ANI > 98% with the genome of reference strains of this species), and  
338 detailed phylogenomic analysis clearly links them to strains isolated from cheese and milk in  
339 Europe. A second group of two MAGs (C-03 and C-13) belongs to the *salivarius* group,  
340 forming a cluster clearly separated from *S. thermophilus* and related to but different from *S.*  
341 *salivarius* (ANI~94%, **Fig. S3A**). This result indicates that they probably belong to a new  
342 species. Finally, MAG-C-10, belonging to the species *S. infantarius*, was compared to the  
343 genomes of the type strain isolated from feces and the CJ18 food strain. The three genomes  
344 share over 98.5% ANI and 1,576 orthologous proteins, confirming their close relationship.  
345 Moreover, MAG-C-10 displays a contig of 26.1 kb, sharing 99.6% identity over 25,870  
346 nucleotides with *S. thermophilus* ATCC 19258. This region contains, in particular, the *lacZ*  
347 and *lacS* genes that allow the rapid assimilation of lactose of *S. thermophilus*. It is flanked at  
348 the 5' end by genes belonging to the IS3 mobile element and at its 3' end by a 55-nucleotide  
349 signature flanking the IS1182 family transposase in Streptococci. Complementary analysis by  
350 read mapping showed that this region is covered at the same average level as the 1,516 genes  
351 defined above as being common to the three *S. infantarius* strains.

352           Concerning species growing on the rinds, eight MAGs referring to *C. variabile* were  
353 recovered. They display a very close relatedness (ANI > 99%) with the only two genomes  
354 deposited at the NCBI (DSM 44702 and Mu292 strains isolated from smear-ripened cheeses  
355 in Ireland (Schröder, Maus, Trost, & Tauch, 2011) and France (E. Dugat-Bony et al., 2016),  
356 respectively. Furthermore, MAGs corresponding to known cheese halotolerant bacteria such  
357 as *S. saprophyticus* (three MAGs), *Bavaricoccus seileri* (4), *Brachybacterium alimentarium*  
358 (2) and several *Brevibacterium* species were recovered.

359 The ten fungal MAG reconstituted in this study could be assigned to four species:  
360 *Debaryomyces hansenii*, *Diutina catenulata*, *Geotrichum candidum* and *Kodamaeae ohmeri*  
361 (**Table S5**). Genomic comparison with the reference strains available in the NCBI database  
362 shows that *G. candidum* and *K. ohmeri* MAGs display ANI > 99% and alignment to reference  
363 > 80% to CLIB918 and 148 strains isolated from Pont l'Evêque cheese in Normandy (France)  
364 and from honeybee gut in the USA, respectively. Finally, *D. catenulata* and *D. hansenii*  
365 MAGs present ANI = ~97.5% and alignment to reference of 60-90% (depending of the MAG  
366 quality) and 95%, respectively.

367

### 368 3.3.3 Detection of pathogens, virulence factors and antibiotic resistances

369 Strains of 12 pathogen species commonly found in dairy products were searched for  
370 by deep profiling analysis in the Brazilian cheese metagenomes (**Table S7**). *S. aureus* was  
371 detected at significant levels in the Canastra cheese rind sample C-R02 (0.5% of reads  
372 mapped), with an average gene detection rate of 14.6 reads/kb. Since this level of coverage  
373 allows a reliable detection of genes in metagenomes, we searched for the presence of 27  
374 staphylococcal enterotoxins responsible for foodborne outbreaks, and only enterotoxin A (*sea*,  
375 *entA*) and X (*selx*) were found. Finally, among the other species, only *Escherichia coli* was  
376 detected in two core samples from the South (C-15 and C-20), at average levels of 1.3 and 2.5  
377 reads/kb, which is below the threshold required to perform a reliable detection of virulence  
378 genes.

379 In addition, a mapping-based approach against a comprehensive collection of  
380 antibiotic resistance genes was performed. A total of 30 ABR genes were identified,  
381 belonging to nine different classes of antibiotics (**Fig. 5** and **Table S6**). The presence of ABR  
382 genes was detected in all samples, except in three (C-R09, C-03 and C-R04). The C-R02  
383 cheese sample displayed the highest number (nine ABR genes). Overall, the most abundantly



384 detected antibiotic class was tetracycline, comprising ten different genes of which the *tetK*  
385 and *tetS* genes were present in five and four samples, respectively. While the *tetK* gene was  
386 detected (exclusively) in cheese rind samples containing Staphylococcal species (*S. aureus*, *S.*  
387 *saprophyticus* and *S. xylosus*), the *tetS* gene was detected in four samples where streptococcal  
388 species were dominant. In particular, *tetS* displays a coverage level similar to *S. thermophilus*  
389 genes in C-15, C-18 and C-20, whereas it is 70 times lower than those of MAG-C-13  
390 belonging to *S. salivarius*-like in C-13. Finally, the gene *qnrDI*, detected in the C-R06 and C-  
391 R13 samples, was found in contigs with coverage similar to those of *Serratia* and *Providencia*  
392 present in both samples, respectively.

393

#### 394 **4 Discussion**

395 Artisanal and traditional cheese production has received increased attention as sources  
396 of biological resources potentially capable of contributing to technological and health  
397 benefits. However, there is an increasing trend, in artisanal production as well, of using starter  
398 strains to ensure a rapid and safe lactic fermentation, and, often, the addition of secondary  
399 microbiota to more effectively control ripening (Bintsis, 2018; García-Díez & Saraiva, 2021;  
400 Vandera, Kakouri, Koukkou, & Samelis, 2019). On the other hand, proper selection of native  
401 strains may offer the opportunity to preserve the typicity of the cheese, while offering an  
402 excellent level of safety (Gaglio, Todaro, & Settanni, 2021). In order to optimize such a  
403 process, cheeses used as original material for strain selection should be carefully selected in  
404 order to maximize those with original microbiota and to absolutely avoid those “spoiled” by  
405 industrial starter strains, making it difficult to isolate new strains with original properties. In  
406 this respect, regions where legislation excludes the use of starter cultures or additives provide  
407 the opportunity for the development of autochthonous microorganisms. In this study, we  
408 decided to develop a method based on metagenomics to explore the biodiversity of cheese  
409 microbiota in order to characterize their originality and potential value as a bio-resource. We

410 studied 23 cheese samples from two regions, South and Southeast Brazil, combining a  
411 metagenetic approach to obtain a global view of their microbiota at the genus/family level  
412 with metagenomic approaches to access functional and phylogenetic information (**Fig. S5**).

413

#### 414 *4.1 Microbial patrimony of artisanal Brazilian cheeses*

415 As expected, analysis of the cheese cores showed the dominance of LAB such as *L.*  
416 *lactis* and *S. thermophilus*, as already described at the genus level by Kamimura *et al.* (2019)  
417 (Kamimura, De Filippis, et al., 2019), except in one sample, which was a production failure,  
418 leading to the predominance of an enterobacterium, *Kluyvera cryocrescens*. The analysis of  
419 the *L. lactis* MAGs indicated that *L. lactis* present in Brazilian cheese form a particular  
420 phylogenomic group within the *lactis* subspecies that differentiate them from the traditional  
421 starters (**Fig. S4**). Further analysis such as strain isolation and genome sequencing will be  
422 valuable in providing more information about specific genes and should pave the way for  
423 technological studies focused on the use of these strains, as biopreservatives, for example, as  
424 was shown with the *L. lactis* strain QMF11 isolated from a Brazilian cheese, which has strong  
425 anti-listerial activity (Costa et al., 2018).

426 Interestingly, our study also revealed the presence of two original streptococcal  
427 species as the main LABs in several samples. Firstly, *S. infantarius* was found in cheeses  
428 from the two regions, and it was even dominant in the core of two SE cheese samples. *S.*  
429 *infantarius* has already been isolated from Brazilian cheeses (Brito et al., 2020; Medeiros et  
430 al., 2016) and it is the main LAB isolated from traditional fermented camel and cow milk in  
431 East and West Africa, respectively (Jans, Kaindi, et al., 2013). In these countries, the strains  
432 isolated from dairy products were shown to contain *lacZ-lacS* genes that share high sequence  
433 identity with those of *S. thermophilus*, which provide them with the ability to rapidly  
434 assimilate lactose from milk (Jans, Follador, et al., 2013). Further analysis of these sequences

435 showed that East and West African strains independently acquired their *lacZ-lacS* genes from  
436 different donor species by horizontal gene transfer (HGT) (Almeida et al., 2014). Our data  
437 shows that the Brazilian dairy strains of *S. infantarius* also acquired these genes by HGT from  
438 *S. thermophilus* on a large DNA fragment (25,870 nucleotides) flanked by two mobile  
439 elements. Features such as the very high identity (99.6%) over the whole length of the  
440 fragment and the absence of a recombination event to remove the unnecessary genes indicate  
441 that this transfer occurred independently from those described in Africa, and very recently.  
442 Secondly, while metagenetic analysis highlighted the presence of Streptococci of the  
443 *thermophilus-vestibularis-salivarius* group, which are usually referred to as *S. thermophilus* in  
444 dairy products, the metagenomic analysis revealed that cheeses from the Southeast region  
445 contain a potentially novel species closely related to *S. salivarius* (**Fig. 4; Fig S3A**). The  
446 presence in food of these two streptococcal species that probably originated from the human  
447 gut, raises the question of their safety in the event of regular consumption. While Streptococci  
448 of the *salivarius* group are generally human commensal bacteria that dominate the oral  
449 microbiota (Carlsson, Grahnén, Jonsson, & Wikner, 1970; McCarthy, Snyder, & Parker,  
450 1965) and may be used as probiotics (Wescombe, Hale, Heng, & Tagg, 2012), the role of *S.*  
451 *infantarius* in human microbiota is less well established. Nevertheless, its consumption at  
452 high levels in African fermented milk indicates that this bacterium is safe for humans (Jans et  
453 al., 2017), and a study has shown that it is not associated with colorectal cancer as is its  
454 relative in the SBSEC group, *S. gallolyticus* (Jans, Meile, Lacroix, & Stevens, 2015). Overall,  
455 these results indicate that cheese-making practices without the use of LAB starters favored the  
456 emergence of two novel streptococcal food strains whose properties should be further studied  
457 to ensure their safety and to reveal potentially interesting technological properties.

458         Concerning the cheese rinds, cheeses from the South region, which are not subject to  
459 long ripening, mainly contain core bacterial species (**Fig. 3B**), whereas cheeses from the

460 Southeast region are generally dominated by *C. variabile*. Although less prevalent than *C.*  
461 *casei* (Kothe et al., 2021), this halotolerant species is well known for being part of the  
462 complex microbiota that develops on the surface of ripened cheeses (Bertuzzi et al., 2018; E.  
463 Dugat-Bony et al., 2016) and is also used as a ripening adjunct in several cheese production  
464 processes (Delbes, Monnet, & Irlinger, 2015). The *C. variabile*-type strain possesses specific  
465 genes associated with metabolic functions involved in the technology and adaptation to  
466 cheese habitats (Schröder et al., 2011). As shown by our MAG analysis, *C. variabile* present  
467 in SE Brazilian cheeses is closely related to strains isolated from smear ripened-cheeses in  
468 Ireland (Schröder et al., 2011) and in France (E. Dugat-Bony et al., 2016). Brazilian cheeses  
469 might thus be an interesting source to recover new strains for cheese technology. Moreover, *S.*  
470 *saprophyticus*, a coagulase-negative staphylococcus, was found to be the second most  
471 frequent and abundant halotolerant bacteria. This species is frequently detected on the surface  
472 of smear-ripened cheese and other fermented foods (Coton et al., 2010; Hammer, Jordan,  
473 Jacobs, & Klempt, 2019). While *S. equorum* appears to be the most frequent staphylococcal  
474 species in Western cheeses (Kothe et al., 2021), our analysis and an earlier study (Casaes  
475 Nunes, Pires de Souza, Pereira, Del Aguila, & Flosi Paschoalin, 2016) indicate that *S.*  
476 *saprophyticus* is more prevalent in Brazilian cheeses. Finally, several less frequent  
477 halotolerant species from the genera *Bavaricoccus* and *Brevibacterium* are commonly found  
478 in SE cheese, whereas more halophilic species belonging to genera such as *Psychrobacter* and  
479 *Halomonas* appear to be scarce compared to Western cheeses (Kothe et al., 2021).

480       Regarding eukaryotes, overall, we observed that the South samples are dominated by  
481 *Debaryomyces hansenii*, while Southeast cheeses are more diverse, notably with the presence  
482 of *Diutina catenulata*, *Kodamae ohmeri*, *Trichosporon sp.* and *Moniliella sp.* (**Fig. 3C**).  
483 Although the presence of these species has been reported worldwide in dairy products  
484 (Banjara et al., 2015; E. Dugat-Bony et al., 2016; Irlinger, Layec, Hélinck, & Dugat-Bony,

485 2015; Wolfe et al., 2014), only *G. candidum* and *D. hansenii* species are known to play a role  
486 in cheese ripening (Irlinger et al., 2015; Irlinger & Monnet, 2021; Perkins et al., 2020; Pham,  
487 Landaud, Lieben, Bonnarne, & Monnet, 2019). *G. candidum*, in particular, has been found in  
488 significant amounts only in one cheese where it is added by the producer, suggesting that this  
489 yeast is not naturally of major importance in these artisanal products. Moreover, *Kodamaea*  
490 *ohmeri* and *Diutina catenulata* are poorly studied at the genomic level and no cheese strain  
491 genomes of these species are available at this time. The present MAGs thus provide a first  
492 insight into their relatedness to environmental yeast strains.

493

#### 494 4.2 Potential safety concerns

495 In this study, we determined - through metagenomic reads - that several samples,  
496 especially C-13, C-15 and C-18, presented more than 30% of the reads mapped on the *Bos*  
497 *taurus* genome (**Table S3**). Almeida *et al.* (2014) also described similar findings in a blue-  
498 veined cheese (Almeida et al., 2014), and the presence at high levels of animal reads in dairy  
499 metagenomes could be associated with the presence of milk somatic cells, which are markers  
500 of mastitis in dairy cattle, indicating herd health problems (Moradi, Omer, Razavi, Valipour,  
501 & Guimarães, 2021; Petzer, Karzis, Donkin, Webb, & Etter, 2017). This may be due to the  
502 fact that in artisanal productions, especially in small farms, milk from an animal with mastitis  
503 may not be eliminated from the production chain because of the significant financial loss that  
504 this may represent.

505 Regarding microbiological risks, we detected Staphylococci in a number of samples,  
506 relatively in accordance with the previous large-scale study of microbial diversity in Brazilian  
507 cheeses (Kamimura, De Filippis, et al., 2019). Since this study was made at the genus level, it  
508 left open the possibility of a high prevalence in Brazilian cheeses of *S. aureus*, a common  
509 pathogen in dairy industries worldwide (Cretenet, Even, & Le Loir, 2011), including in Brazil

510 (Dittmann et al., 2017). We were able to show with a high degree of confidence that most  
511 species belong to coagulase-negative species such as *S. saprophyticus*, whereas a significant  
512 amount of *S. aureus* was detected in only one sample. However, in this sample, we identified  
513 the presence of the heat-stable enterotoxin A (*sea*), which is associated with illness,  
514 accounting for 77.8% of all staphylococcal foodborne disease outbreaks (Argudín, Mendoza,  
515 & Rodicio, 2010; Balaban & Rasooly, 2000; Kadariya, Smith, & Thapaliya, 2014), indicating  
516 a potential health risk to consumers.

517 Furthermore, we detected the presence of several transmissible antibiotic resistance  
518 genes that are considered to be a growing threat to public health, both in hospital and food  
519 industry environments (Y. Li et al., 2020; Yadav & Kapley, 2021). These notably include *tetS*  
520 and *tetK* genes, which are probably associated with the presence of streptococcal and  
521 staphylococcal species, respectively. Tetracycline resistance has been largely reported in  
522 fermented foods, for example, in cheese ripening (Ana Belén Flórez, Delgado, & Mayo, 2005;  
523 Ana B. Flórez, Vázquez, & Mayo, 2017; X. Li, Li, Alvarez, Harper, & Wang, 2011) and,  
524 more specifically, the occurrence of the *tetS* gene has been associated with *S. thermophilus* in  
525 cheeses (Ge et al., 2007; Rizzotti, La Gioia, Dellaglio, & Torriani, 2009), whereas that of *tetK*  
526 has been associated with *S. aureus* in dairy products (Jamali, Paydar, Radmehr, Ismail, &  
527 Dadrasnia, 2015) and different species of coagulase-negative staphylococci in salami samples  
528 (Rebecchi, Pisacane, Callegari, Puglisi, & Morelli, 2015). The presence of antibiotic  
529 resistance genes at high levels is often associated with the use of milk from animals treated  
530 with antibiotics (Tóth et al., 2020).

531

## 532 **5 Conclusion**

533 The data presented here show that the artisanal cheeses produced in the South and  
534 Southeast regions of Brazil display an original microbiota, only marginally contaminated by  
535 industrial starters. Interestingly, it contains original lineages of bacterial strains belonging to

536 known species of technological interest, such as *L. lactis* and *C. variabile*, as well as yeasts  
537 such as *D. hansenii*. It also contains less ordinary food species such as the bacteria *B. seileri*,  
538 *B. alimentarium*, *S. saprophyticus*, and the yeast *D. catenulata*. Moreover, two new food  
539 streptococci, *S. infantarius* and *S. salivarius-like* were found to be the main LAB in several  
540 production schemes, confirming the high originality of the Brazilian artisanal cheese  
541 microbiota and the value of this small-scale production scheme, which collectively represent a  
542 reservoir of biodiversity. Additional studies should be performed in order to improve our  
543 understanding of these microbiota and their impact on the sensory aspects of Brazilian  
544 cheeses. The further characterization of representative strains will also open the possibility to  
545 develop inoculants that maintain the cultural and historical identities of these cheeses and to  
546 establish standards of quality for their production. Finally, our study identifies several areas of  
547 concern, such as the presence of somatic cell DNA and high levels of antibiotic resistance  
548 genes in several microbiota, inferring that the milk used was from diseased herds. Overall, the  
549 data from this study highlight the potential value of the traditional and artisanal cheese  
550 production network in Brazil, and provide a metagenomic-based scheme to help manage this  
551 resource safely.

552

### 553 **Authors' contributions**

554 CIK and PR conceived the study and its experimental design. CIK performed  
555 microbiological, genomic, metagenomic and functional analyses. NM and PR contributed to  
556 genomic and functional analysis. CIK provided data visualization. CIK and PR wrote the  
557 manuscript. PR supervised the project.

558

### 559 **Acknowledgements**

560 The authors are grateful to Mathieu Almeida and Stéphane Chaillou for sharing their  
561 knowledge with us about metagenomic data analysis.

562 CIK's grant was supported by the "Conselho Nacional de Desenvolvimento Científico  
563 e Tecnológico (CNPq)" – Brazil [grant number 202444/2017-1].

564

## 565 **Table and Figures Legends**

566 **Fig. 1.** Map of Brazil showing regions and types of cheeses collected.

567 **Fig. 2.** Boxplots of alpha-diversity indices, PCoAs and clustering among bacterial  
568 communities identified in the core (**A**) or rind (**B**) of Brazilian cheeses, and fungal  
569 communities identified in the rind (**C**). Samples are colored according to the different regions  
570 where they are produced, i.e., blue for South and red for Southeast.

571 **Fig. 3.** Bacterial (16S, **A-B**) and fungal (ITS, **C**) plot depicting the relative abundance of the  
572 25 main species found in Brazilian cheese cores and rinds. One asterisk (\*) indicates low  
573 depth of the sequences and two asterisks (\*\*) indicate samples that are not amplified.

574 **Fig. 4.** The relative abundance of microbial composition of 15 Brazilian cheeses (six cores  
575 and nine rinds). Values were calculated from the coverage of the *ychF* marker gene assembled  
576 in the metagenomes. The asterisk (\*) indicates a low depth of the sequences.

577 **Fig. 5.** Heatmap showing distribution of the 30 antibiotic resistance genes detected in reads/kb  
578 within the 15 metagenomic samples. \*MLS: Macrolide, lincosamide and streptogramin.

579

## 580 **Supplementary Material**

581 **Supplementary Data 1.** The production process and characteristics of Araxá, Canastra,  
582 Serro, Colonial and Serrano.

583 **Fig. S1.** Rarefaction curves depicting the depth of 16S (core and rind) and ITS (rind)  
584 sequencing, as well as species richness for the data obtained from Brazilian cheeses. The x-  
585 axis represents the sequencing depth (reads) and the y-axis represents the estimated OTU  
586 richness detected at species level.



587 **Fig S2.** Phylogeny of species detected by *ychF*, highlighting the reconstituted MAGs.  
588 **Fig. S3.** Potential new species and genera found by autoMLST analyses.  
589 **Fig. S4.** Phylogenomic tree for *Lactococcus lactis* highlighting the different groups of *L.*  
590 *lactis*.  
591 **Fig. S5.** Overview of approaches used in this study.  
592 **Table S1.** Metadata describing the 23 cheese samples analyzed.  
593 **Table S2.** Raw reads detected of bacterial and fungal operational taxonomic units (OTUs) in  
594 the samples.  
595 **Table S3.** Percentage (%) of *Bos Taurus* reads aligned in each cheese metagenome.  
596 **Table S4.** The relative abundance of microbial composition of 15 cheese metagenomes from  
597 Brazil using MetaPhlAn taxonomic assignment and *ychF* marker gene methods.  
598 **Table S5.** Quality of prokaryotic and eukaryotic MAGs and their ANIs with the closest  
599 reference genome found in the NCBI database.  
600 **Table S6.** Coverage (reads/kb) of antibiotic resistance and genes of technological interest.  
601 **Table S7.** Detection of 12 pathogens commonly found in dairy environments by read  
602 mapping expressed in percentage of total read mapped on a set of reference genomes.  
603

## 604 **6 References**

605 Alanjary, M., Steinke, K., & Ziemert, N. (2019). AutoMLST: an automated web server for generating  
606 multi-locus species trees highlighting natural product potential. *Nucleic Acids Research*,  
607 47(W1), W276-W282. doi:10.1093/nar/gkz282  
608 Almeida, M., Hébert, A., Abraham, A.-L., Rasmussen, S., Monnet, C., Pons, N., . . . Renault, P. (2014).  
609 Construction of a dairy microbial genome catalog opens new perspectives for the  
610 metagenomic analysis of dairy fermented products. *BMC Genomics*, 15(1), 1101.  
611 doi:10.1186/1471-2164-15-1101  
612 Antonopoulos, D. A., Assaf, R., Aziz, R. K., Brettin, T., Bun, C., Conrad, N., . . . Yoo, H. (2019). PATRIC as  
613 a unique resource for studying antimicrobial resistance. *Briefings in Bioinformatics*, 20(4),  
614 1094-1102. doi:10.1093/bib/bbx083  
615 Argudín, M. Á., Mendoza, M. C., & Rodicio, M. R. (2010). Food Poisoning and *Staphylococcus aureus*  
616 Enterotoxins. *Toxins*, 2(7). doi:10.3390/toxins2071751  
617 Balaban, N., & Rasooly, A. (2000). Staphylococcal enterotoxins. *International Journal of Food*  
618 *Microbiology*, 61(1), 1-10. doi:[https://doi.org/10.1016/S0168-1605\(00\)00377-9](https://doi.org/10.1016/S0168-1605(00)00377-9)

- 619 Banjara, N., Suhr, M. J., & Hallen-Adams, H. E. (2015). Diversity of Yeast and Mold Species from a  
620 Variety of Cheese Types. *Current Microbiology*, 70(6), 792-800. doi:10.1007/s00284-015-  
621 0790-1
- 622 Bankevich, A., Nurk, S., Antipov, D., Gurevich, A. A., Dvorkin, M., Kulikov, A. S., . . . Pevzner, P. A.  
623 (2012). SPAdes: a new genome assembly algorithm and its applications to single-cell  
624 sequencing. *Journal of computational biology : a journal of computational molecular cell*  
625 *biology*, 19(5), 455-477. doi:10.1089/cmb.2012.0021
- 626 Bertuzzi, A. S., Walsh, A. M., Sheehan, J. J., Cotter, P. D., Crispie, F., McSweeney, P. L. H., . . . Rea, M.  
627 C. (2018). Omics-Based Insights into Flavor Development and Microbial Succession within  
628 Surface-Ripened Cheese. *mSystems*, 3(1), e00211-00217. doi:10.1128/mSystems.00211-17
- 629 Bintsis, T. (2018). Lactic acid bacteria as starter cultures: An update in their metabolism and genetics.  
630 *AIMS Microbiology*, 4(4), 665-684. doi:10.3934/microbiol.2018.4.665
- 631 Borelli, B. M., Lacerda, I. C. A., Penido, F. C. L., & Rosa, C. A. (2016). Traditional cheeses produced in  
632 Brazil: Characterisation, production technologies and health implications. In E. Perkins (Ed.),  
633 *Food Microbiology* (pp. 161-190). New York: Nova Publishers.
- 634 Brito, L. P. d., Silva, E. C. d., Calaça, P. R. d. A., Medeiros, R. S. d., Soares, M. T. C. V., & Porto, A. L. F.  
635 (2020). Lactic acid bacteria isolated from Coalho cheese from northeast Brazil in dairy  
636 production: A screening for technological application. *Research, Society and Development*,  
637 9(10), e5249108457. doi:10.33448/rsd-v9i10.8457
- 638 Cabral, M. L. B., Lima, M. d. S. F. d., Fernandes, G., Costa, E. G. d., Porto, A. L. F., & Cavalcanti, M. T. H.  
639 (2016). Artisan cheese: a potential source of wild lactic acid bacteria to obtain new starter  
640 cultures. *Journal of Bioenergy and Food Science*, 3, 207-215.
- 641 Carlsson, J., Grahén, H., Jonsson, G., & Wikner, S. (1970). Early Establishment of *Streptococcus*  
642 *salivarius* in the Mouths of Infants. *Journal of Dental Research*, 49(2), 415-418.  
643 doi:10.1177/00220345700490023601
- 644 Casaes Nunes, R. S., Pires de Souza, C., Pereira, K. S., Del Aguila, E. M., & Flosi Paschoalin, V. M.  
645 (2016). Identification and molecular phylogeny of coagulase-negative staphylococci isolates  
646 from Minas Frescal cheese in southeastern Brazil: Superantigenic toxin production and  
647 antibiotic resistance. *Journal of Dairy Science*, 99(4), 2641-2653.  
648 doi:<https://doi.org/10.3168/jds.2015-9693>
- 649 Ciccarelli, F. D., Doerks, T., von Mering, C., Creevey, C. J., Snel, B., & Bork, P. (2006). Toward  
650 Automatic Reconstruction of a Highly Resolved Tree of Life. *Science*, 311(5765), 1283.  
651 doi:10.1126/science.1123061
- 652 Costa, A., Neves Pereira, A., Silva, A., Silva, F., Ribeiro, K., Torres, I., . . . Alves, V. (2018). Antilisterial  
653 and antistaphylococcal activity of a *Lactococcus lactis* strain isolated from Brazilian fresh  
654 Minas cheese. *Journal of Food Safety*, 39. doi:10.1111/jfs.12593
- 655 Coton, E., Desmonts, M.-H., Leroy, S., Coton, M., Jamet, E., Christieans, S., . . . Talon, R. (2010).  
656 Biodiversity of Coagulase-Negative Staphylococci in French cheeses, dry fermented sausages,  
657 processing environments and clinical samples. *International Journal of Food Microbiology*,  
658 137(2), 221-229. doi:<https://doi.org/10.1016/j.ijfoodmicro.2009.11.023>
- 659 Cretenet, M., Even, S., & Le Loir, Y. (2011). Unveiling *Staphylococcus aureus* enterotoxin production  
660 in dairy products: a review of recent advances to face new challenges. *Dairy Science &*  
661 *Technology*, 91(2), 127-150. doi:10.1007/s13594-011-0014-9
- 662 de Medeiros Carvalho, M., de Fariña, L. O., Strongin, D., Ferreira, C. L. L. F., & Lindner, J. D. D. (2019).  
663 Traditional Colonial-type cheese from the south of Brazil: A case to support the new Brazilian  
664 laws for artisanal cheese production from raw milk. *Journal of Dairy Science*, 102(11), 9711-  
665 9720. doi:<https://doi.org/10.3168/jds.2019-16373>
- 666 Delbes, C., Monnet, C., & Irlinger, F. (2015). Des communautés microbiennes au service de la qualité  
667 des fromages : diversité et dynamique adaptative et fonctionnelle des populations  
668 endogènes etensemencées.
- 669 Dittmann, K. K., Chaul, L. T., Lee, S. H. I., Corassin, C. H., Fernandes de Oliveira, C. A., Pereira De  
670 Martinis, E. C., . . . Oxaran, V. (2017). *Staphylococcus aureus* in Some Brazilian Dairy

- 671 Industries: Changes of Contamination and Diversity. *Frontiers in Microbiology*, 8(2049).  
672 doi:10.3389/fmicb.2017.02049
- 673 Dugat-Bony, E., Garnier, L., Denonfoux, J., Ferreira, S., Sarthou, A. S., Bonnarne, P., & Irlinger, F.  
674 (2016). Highlighting the microbial diversity of 12 French cheese varieties. *International*  
675 *Journal of Food Microbiology*, 238, 265-273. doi:10.1016/j.ijfoodmicro.2016.09.026
- 676 Dugat-Bony, E., Sarthou, A. S., Loux, V., Vidal, M., Bonnarne, P., Irlinger, F., & Layec, S. (2016). Draft  
677 Genome Sequence of *Corynebacterium variabile* Mu292, Isolated from Munster, a French  
678 Smear-Ripened Cheese. *Genome announcements*, 4(4), e00669-00616.  
679 doi:doi:10.1128/genomeA.00669-16
- 680 Escudié, F., Auer, L., Bernard, M., Mariadassou, M., Cauquil, L., Vidal, K., . . . Pascal, G. (2018). FROGS:  
681 Find, Rapidly, OTUs with Galaxy Solution. *Bioinformatics*, 34(8), 1287-1294.  
682 doi:10.1093/bioinformatics/btx791
- 683 Felsenstein, J. (1985). Confidence-Limits on Phylogenies - an Approach Using the Bootstrap.  
684 *Evolution*, 39(4), 783-791. doi:DOI 10.1111/j.1558-5646.1985.tb00420.x
- 685 Flórez, A. B., Delgado, S., & Mayo, B. (2005). Antimicrobial susceptibility of lactic acid bacteria  
686 isolated from a cheese environment. *Canadian journal of microbiology*, 51(1), 51-58.  
687 doi:10.1139/w04-114
- 688 Flórez, A. B., Vázquez, L., & Mayo, B. (2017). A Functional Metagenomic Analysis of Tetracycline  
689 Resistance in Cheese Bacteria. *Frontiers in Microbiology*, 8(907).  
690 doi:10.3389/fmicb.2017.00907
- 691 Gaglio, R., Todaro, M., & Settanni, L. (2021). Improvement of Raw Milk Cheese Hygiene through the  
692 Selection of Starter and Non-Starter Lactic Acid Bacteria: The Successful Case of PDO  
693 Pecorino Siciliano Cheese. *International Journal of Environmental Research and Public Health*,  
694 18, 1834. doi:10.3390/ijerph18041834
- 695 García-Díez, J., & Saraiva, C. (2021). Use of Starter Cultures in Foods from Animal Origin to Improve  
696 Their Safety. *International Journal of Environmental Research and Public Health*, 18(5).  
697 doi:10.3390/ijerph18052544
- 698 Gardner, S. N., Slezak, T., & Hall, B. G. (2015). kSNP3.0: SNP detection and phylogenetic analysis of  
699 genomes without genome alignment or reference genome. *Bioinformatics*, 31(17), 2877-  
700 2878. doi:10.1093/bioinformatics/btv271
- 701 Ge, B., Jiang, P., Han, F., Saleh, N. K., Dhiman, N., Fedorko, D. P., . . . Meng, J. (2007). Identification  
702 and Antimicrobial Susceptibility of Lactic Acid Bacteria from Retail Fermented Foods. *Journal*  
703 *of Food Protection*, 70(11), 2606-2612. doi:10.4315/O362-028X-70.11.2606
- 704 Hammer, P., Jordan, J., Jacobs, C., & Klempt, M. (2019). Characterization of coagulase-negative  
705 staphylococci from brining baths in Germany. *Journal of Dairy Science*, 102(10), 8734-8744.  
706 doi:<https://doi.org/10.3168/jds.2018-15610>
- 707 Irlinger, F., Layec, S., Hélinck, S., & Dugat-Bony, E. (2015). Cheese rind microbial communities:  
708 diversity, composition and origin. *Fems Microbiology Letters*, 362(2), 1-11.  
709 doi:10.1093/femsle/fnu015
- 710 Irlinger, F., & Monnet, C. (2021). Temporal differences in microbial composition of Epoisses cheese  
711 rinds during ripening and storage. *Journal of Dairy Science*, 104(7), 7500-7508.  
712 doi:10.3168/jds.2021-20123
- 713 Jain, C., Rodriguez-R, L. M., Phillippy, A. M., Konstantinidis, K. T., & Aluru, S. (2018). High throughput  
714 ANI analysis of 90K prokaryotic genomes reveals clear species boundaries. *Nature*  
715 *Communications*, 9(1), 5114. doi:10.1038/s41467-018-07641-9
- 716 Jamali, H., Paydar, M., Radmehr, B., Ismail, S., & Dadrasnia, A. (2015). Prevalence and antimicrobial  
717 resistance of *Staphylococcus aureus* isolated from raw milk and dairy products. *Food Control*,  
718 54, 383-388. doi:<https://doi.org/10.1016/j.foodcont.2015.02.013>
- 719 Jans, C., Follador, R., Hochstrasser, M., Lacroix, C., Meile, L., & Stevens, M. J. (2013). Comparative  
720 genome analysis of *Streptococcus infantarius* subsp. *infantarius* CJ18, an African fermented  
721 camel milk isolate with adaptations to dairy environment. *BMC Genomics*, 14, 200.  
722 doi:10.1186/1471-2164-14-200

- 723 Jans, C., Kaindi, D. W., Bock, D., Njage, P. M., Kouame-Sina, S. M., Bonfoh, B., . . . Meile, L. (2013).  
724 Prevalence and comparison of *Streptococcus infantarius* subsp. *infantarius* and  
725 *Streptococcus gallolyticus* subsp. *macedonicus* in raw and fermented dairy products from  
726 East and West Africa. *Int J Food Microbiol*, *167*(2), 186-195.  
727 doi:[10.1016/j.ijfoodmicro.2013.09.008](https://doi.org/10.1016/j.ijfoodmicro.2013.09.008)
- 728 Jans, C., Meile, L., Kaindi, D. W. M., Kogi-Makau, W., Lamuka, P., Renault, P., . . . Bonfoh, B. (2017).  
729 African fermented dairy products – Overview of predominant technologically important  
730 microorganisms focusing on African *Streptococcus infantarius* variants and potential future  
731 applications for enhanced food safety and security. *International Journal of Food*  
732 *Microbiology*, *250*, 27-36. doi:<https://doi.org/10.1016/j.ijfoodmicro.2017.03.012>
- 733 Jans, C., Meile, L., Lacroix, C., & Stevens, M. J. A. (2015). Genomics, evolution, and molecular  
734 epidemiology of the *Streptococcus bovis*/*Streptococcus equinus* complex (SBSEC). *Infection,*  
735 *Genetics and Evolution*, *33*, 419-436. doi:<https://doi.org/10.1016/j.meegid.2014.09.017>
- 736 Jia, B., Raphenya, A. R., Alcock, B., Waglechner, N., Guo, P., Tsang, K. K., . . . McArthur, A. G. (2017).  
737 CARD 2017: expansion and model-centric curation of the comprehensive antibiotic resistance  
738 database. *Nucleic Acids Research*, *45*(D1), D566-D573. doi:10.1093/nar/gkw1004
- 739 Kadariya, J., Smith, T. C., & Thapaliya, D. (2014). *Staphylococcus aureus* and Staphylococcal Food-  
740 Borne Disease: An Ongoing Challenge in Public Health. *BioMed Research International*, *2014*,  
741 827965. doi:10.1155/2014/827965
- 742 Kamimura, B. A., De Filippis, F., Sant'Ana, A. S., & Ercolini, D. (2019). Large-scale mapping of microbial  
743 diversity in artisanal Brazilian cheeses. *Food Microbiology*, *80*, 40-49.  
744 doi:<https://doi.org/10.1016/j.fm.2018.12.014>
- 745 Kamimura, B. A., Magnani, M., Luciano, W. A., Campagnollo, F. B., Pimentel, T. C., Alvarenga, V. O., . .  
746 . Sant'Ana, A. S. (2019). Brazilian Artisanal Cheeses: An Overview of their Characteristics,  
747 Main Types and Regulatory Aspects. *Comprehensive Reviews in Food Science and Food*  
748 *Safety*, *18*(5), 1636-1657. doi:<https://doi.org/10.1111/1541-4337.12486>
- 749 Kang, D. D., Froula, J., Egan, R., & Wang, Z. (2015). MetaBAT, an efficient tool for accurately  
750 reconstructing single genomes from complex microbial communities. *Peerj*, *3*, e1165.  
751 doi:10.7717/peerj.1165
- 752 Kothe, C. I., Bolotin, A., Kraiem, B.-F., Dridi, B., team, F. M., & Renault, P. (2021). Unraveling the world  
753 of halophilic and halotolerant bacteria in cheese by combining cultural, genomic and  
754 metagenomic approaches. *International Journal of Food Microbiology*, 109312.  
755 doi:<https://doi.org/10.1016/j.ijfoodmicro.2021.109312>
- 756 Kumar, S., Stecher, G., & Tamura, K. (2016). MEGA7: Molecular Evolutionary Genetics Analysis  
757 Version 7.0 for Bigger Datasets. *Molecular Biology and Evolution*, *33*(7), 1870-1874.  
758 doi:10.1093/molbev/msw054
- 759 Langmead, B., & Salzberg, S. L. (2012). Fast gapped-read alignment with Bowtie 2. *Nature Methods*,  
760 *9*(4), 357-359. doi:10.1038/nmeth.1923
- 761 Li, H., Handsaker, B., Wysoker, A., Fennell, T., Ruan, J., Homer, N., . . . Subgroup., G. P. D. P. (2009).  
762 The Sequence Alignment/Map format and SAMtools. *Bioinformatics*, *25*(16), 2078-2079.  
763 doi:10.1093/bioinformatics/btp352
- 764 Li, X., Li, Y., Alvarez, V., Harper, W. J., & Wang, H. H. (2011). Effective antibiotic resistance mitigation  
765 during cheese fermentation. *Applied and Environmental Microbiology*, *77*(20), 7171-7175.  
766 doi:10.1128/AEM.05069-11
- 767 Li, Y., Cao, W., Liang, S., Yamasaki, S., Chen, X., Shi, L., & Ye, L. (2020). Metagenomic characterization  
768 of bacterial community and antibiotic resistance genes in representative ready-to-eat food in  
769 southern China. *Scientific Reports*, *10*(1), 15175. doi:10.1038/s41598-020-72620-4
- 770 Lima, C. D. L. C., Lima, L. A., Cerqueira, M. M. O. P., Ferreira, E. G., & Rosa, C. A. (2009). Bactérias do  
771 ácido láctico e leveduras associadas com o queijo-de-minas artesanal produzido na região da  
772 Serra do Salitre, Minas Gerais. *Arquivo Brasileiro de Medicina Veterinária e Zootecnia*, *61*,  
773 266-272. Retrieved from [http://www.scielo.br/scielo.php?script=sci\\_arttext&pid=S0102-09352009000100037&nrm=iso](http://www.scielo.br/scielo.php?script=sci_arttext&pid=S0102-09352009000100037&nrm=iso)  
774

- 775 Luiz, L., Castro, R., Silva, J., Oliveira, L., Sales, G., Nunes, A. C., . . . Sandes, S. (2016). Isolation and  
776 identification of lactic acid bacteria from Brazilian Minas artisanal cheese. *CyTA - Journal of*  
777 *Food*, 15, 125. doi:10.1080/19476337.2016.1219392
- 778 Mahe, F., Rognes, T., Quince, C., de Vargas, C., & Dunthorn, M. (2014). Swarm: robust and fast  
779 clustering method for amplicon-based studies. *Peerj*, 2. doi:10.7717/peerj.593
- 780 MAPA (Ministério da Agricultura, Pecuária e Abastecimento). Dispõe sobre a identidade e os  
781 requisitos de qualidade que deve apresentar o produto denominado queijo minas meia cura,  
782 INSTRUÇÃO NORMATIVA Nº 74, DE 24 DE JULHO DE 2020 C.F.R. (2020).
- 783 Margalho, L. P., Feliciano, M. D. E., Silva, C. E., Abreu, J. S., Piran, M. V. F., & Sant'Ana, A. S. (2020).  
784 Brazilian artisanal cheeses are rich and diverse sources of nonstarter lactic acid bacteria  
785 regarding technological, biopreservative, and safety properties—Insights through  
786 multivariate analysis. *Journal of Dairy Science*, 103(9), 7908-7926.  
787 doi:<https://doi.org/10.3168/jds.2020-18194>
- 788 McArthur, A. G., Wagelchner, N., Nizam, F., Yan, A., Azad, M. A., Baylay, A. J., . . . Wright, G. D. (2013).  
789 The comprehensive antibiotic resistance database. *Antimicrobial agents and chemotherapy*,  
790 57(7), 3348-3357. doi:10.1128/AAC.00419-13
- 791 McCarthy, C., Snyder, M. L., & Parker, R. B. (1965). The Indigenous Oral Flora of Man. I. The Newborn  
792 to the 1-Year-Old Infant. *Arch Oral Biol*, 10, 61-70. doi:10.1016/0003-9969(65)90058-0
- 793 McMurdie, P. J., & Holmes, S. (2013). phyloseq: An R Package for Reproducible Interactive Analysis  
794 and Graphics of Microbiome Census Data. *PLOS ONE*, 8(4), e61217.  
795 doi:10.1371/journal.pone.0061217
- 796 Medeiros, R. S., Araújo, L. M., Queiroga Neto, V., Andrade, P. P., Melo, M. A., & Gonçalves, M. M. B.  
797 P. (2016). Identification of lactic acid bacteria isolated from artisanal Coalho cheese produced  
798 in the Brazilian Northeast. *CyTA - Journal of Food*, 14(4), 613-620.  
799 doi:10.1080/19476337.2016.1185468
- 800 Montel, M.-C., Buchin, S., Mallet, A., Delbes-Paus, C., Vuitton, D. A., Desmases, N., & Berthier, F.  
801 (2014). Traditional cheeses: Rich and diverse microbiota with associated benefits.  
802 *International Journal of Food Microbiology*, 177, 136-154.  
803 doi:<https://doi.org/10.1016/j.ijfoodmicro.2014.02.019>
- 804 Moradi, M., Omer, A. K., Razavi, R., Valipour, S., & Guimarães, J. T. (2021). The relationship between  
805 milk somatic cell count and cheese production, quality and safety: A review. *International*  
806 *Dairy Journal*, 113, 104884. doi:<https://doi.org/10.1016/j.idairyj.2020.104884>
- 807 Parks, D. H., Imelfort, M., Skennerton, C. T., Hugenholtz, P., & Tyson, G. W. (2015). CheckM: assessing  
808 the quality of microbial genomes recovered from isolates, single cells, and metagenomes.  
809 *Genome Research*, 25(7), 1043-1055. doi:10.1101/gr.186072.114
- 810 Penna, A. L. B., Gigante, M. L., & Todorov, S. D. (2021). Artisanal Brazilian Cheeses—History,  
811 Marketing, Technological and Microbiological Aspects. *Foods*, 10(7), 1562. Retrieved from  
812 <https://www.mdpi.com/2304-8158/10/7/1562>
- 813 Perin, L. M., Sardaro, M. L. S., Nero, L. A., Neviani, E., & Gatti, M. (2017). Bacterial ecology of artisanal  
814 Minas cheeses assessed by culture-dependent and -independent methods. *Food*  
815 *Microbiology*, 65, 160-169. doi:10.1016/j.fm.2017.02.005
- 816 Perkins, V., Vignola, S., Lessard, M. H., Plante, P. L., Corbeil, J., Dugat-Bony, E., . . . Labrie, S. (2020).  
817 Phenotypic and Genetic Characterization of the Cheese Ripening Yeast *Geotrichum*  
818 *candidum*. *Front Microbiol*, 11, 737. doi:10.3389/fmicb.2020.00737
- 819 Petzer, I.-M., Karzis, J., Donkin, E. F., Webb, E. C., & Etter, E. M. C. (2017). Somatic cell count  
820 thresholds in composite and quarter milk samples as indicator of bovine intramammary  
821 infection status. *The Onderstepoort journal of veterinary research*, 84(1), e1-e10.  
822 doi:10.4102/ojvr.v84i1.1269
- 823 Pham, N. P., Landaud, S., Lieben, P., Bonnarne, P., & Monnet, C. (2019). Transcription Profiling  
824 Reveals Cooperative Metabolic Interactions in a Microbial Cheese-Ripening Community  
825 Composed of *Debaryomyces hansenii*, *Brevibacterium aurantiacum*, and *Hafnia alvei*. *Front*  
826 *Microbiol*, 10, 1901. doi:10.3389/fmicb.2019.01901

- 827 Poirier, S., Rué, O., Peguilhan, R., Coeuret, G., Zagorec, M., Champomier-Vergès, M.-C., . . . Chaillou,  
828 S. (2018). Deciphering intra-species bacterial diversity of meat and seafood spoilage  
829 microbiota using gyrB amplicon sequencing: A comparative analysis with 16S rDNA V3-V4  
830 amplicon sequencing. *PLOS ONE*, *13*(9), e0204629. doi:10.1371/journal.pone.0204629
- 831 Pontarolo, G. H., Melo, F. D., Martini, C. L., Wildemann, P., Alessio, D. R. M., Sfaciotte, R. A. P., . . .  
832 Ferraz, S. M. (2017). Quality and safety of artisan cheese produced in the serrana region of  
833 Santa Catarina. *Semina-Ciencias Agrarias*, *38*(2), 739-748. doi:10.5433/1679-  
834 0359.2017v38n2p739
- 835 Quast, C., Pruesse, E., Yilmaz, P., Gerken, J., Schweer, T., Yarza, P., . . . Glöckner, F. O. (2013). The  
836 SILVA ribosomal RNA gene database project: improved data processing and web-based tools.  
837 *Nucleic Acids Research*, *41*(D1), D590-D596. doi:10.1093/nar/gks1219
- 838 Rebecchi, A., Pisacane, V., Callegari, M. L., Puglisi, E., & Morelli, L. (2015). Ecology of antibiotic  
839 resistant coagulase-negative staphylococci isolated from the production chain of a typical  
840 Italian salami. *Food Control*, *53*, 14-22. doi:<https://doi.org/10.1016/j.foodcont.2015.01.001>
- 841 Resende, M. F. S., Costa, H. H. S., Andrade, E. H. P., Acurcio, L. B., Drummond, A. F., Cunha, A. F., . . .  
842 Souza, M. R. (2011). Influence of altitude on lactic acid bacteria population of minas artisanal  
843 cheese from Serra da Canastra. *Arquivo Brasileiro de Medicina Veterinária e Zootecnia*, *63*(6),  
844 1567-1573. doi:10.1590/S0102-09352011000600039
- 845 Rizzotti, L., La Gioia, F., Dellaglio, F., & Torriani, S. (2009). Characterization of tetracycline-resistant  
846 *Streptococcus thermophilus* isolates from Italian soft cheeses. *Applied and Environmental*  
847 *Microbiology*, *75*(12), 4224-4229. doi:10.1128/AEM.01380-08
- 848 Rognes, T., Flouri, T., Nichols, B., Quince, C., & Mahe, F. (2016). VSEARCH: a versatile open source  
849 tool for metagenomics. *PeerJ*, *4*. doi:10.7717/peerj.2584
- 850 RS (Rio Grande do Sul). Dispõe sobre a produção e a comercialização do queijo artesanal serrano no  
851 Estado do Rio Grande do Sul, (2016).
- 852 Saitou, N., & Nei, M. (1987). The Neighbor-Joining Method - a New Method for Reconstructing  
853 Phylogenetic Trees. *Molecular Biology and Evolution*, *4*(4), 406-425. doi:DOI  
854 10.1093/oxfordjournals.molbev.a040454
- 855 Schröder, J., Maus, I., Trost, E., & Tauch, A. (2011). Complete genome sequence of *Corynebacterium*  
856 *variabile* DSM 44702 isolated from the surface of smear-ripened cheeses and insights into  
857 cheese ripening and flavor generation. *BMC Genomics*, *12*(1), 545. doi:10.1186/1471-2164-  
858 12-545
- 859 Sunagawa, S., Mende, D., Zeller, G., Izquierdo-Carrasco, F., Berger, S., Kultima, J., . . . Bork, P. (2013).  
860 Metagenomic species profiling using universal phylogenetic marker genes. *Nature Methods*,  
861 *10*. doi:10.1038/nmeth.2693
- 862 Thompson, J. D., Gibson, T. J., Plewniak, F., Jeanmougin, F., & Higgins, D. G. (1997). The CLUSTAL\_X  
863 windows interface: flexible strategies for multiple sequence alignment aided by quality  
864 analysis tools. *Nucleic Acids Research*, *25*(24), 4876-4882. doi:DOI 10.1093/nar/25.24.4876
- 865 Tóth, A. G., Csabai, I., Krikó, E., Tózsér, D., Maróti, G., Patai, Á. V., . . . Solymosi, N. (2020).  
866 Antimicrobial resistance genes in raw milk for human consumption. *Scientific Reports*, *10*(1),  
867 7464. doi:10.1038/s41598-020-63675-4
- 868 Truong, D. T., Franzosa, E., Tickle, T., Scholz, M., Weingart, G., Pasolli, E., . . . Segata, N. (2015).  
869 MetaPhlan2 for enhanced metagenomic taxonomic profiling. *Nature Methods*, *12*, 902-903.  
870 doi:10.1038/nmeth0116-101b
- 871 Vandera, E., Kakouri, A., Koukkou, A.-I., & Samelis, J. (2019). Major ecological shifts within the  
872 dominant nonstarter lactic acid bacteria in mature Greek Graviera cheese as affected by the  
873 starter culture type. *International Journal of Food Microbiology*, *290*, 15-26.  
874 doi:<https://doi.org/10.1016/j.ijfoodmicro.2018.09.014>
- 875 Walsh, A., Macori, G., Kilcawley, K., & Cotter, P. (2020). Meta-analysis of cheese microbiomes  
876 highlights contributions to multiple aspects of quality. *Nature Food*, *1*, 500-510.  
877 doi:10.1038/s43016-020-0129-3

- 878 Wescombe, P. A., Hale, J. D. F., Heng, N. C. K., & Tagg, J. R. (2012). Developing oral probiotics from  
879 *Streptococcus salivarius*. *Future Microbiology*, 7(12), 1355-1371. doi:10.2217/fmb.12.113
- 880 Wingett, S., & Andrews, S. (2018). FastQ Screen: A tool for multi-genome mapping and quality  
881 control. *F1000Research*, 7, 1338. doi:10.12688/f1000research.15931.1
- 882 Wolfe, B. E., Button, J. E., Santarelli, M., & Dutton, R. J. (2014). Cheese Rind Communities Provide  
883 Tractable Systems for In Situ and In Vitro Studies of Microbial Diversity. *Cell*, 158(2), 422-433.  
884 doi:10.1016/j.cell.2014.05.041
- 885 Yadav, S., & Kapley, A. (2021). Antibiotic resistance: Global health crisis and metagenomics.  
886 *Biotechnology Reports*, 29, e00604. doi:<https://doi.org/10.1016/j.btre.2021.e00604>



## SOUTHEAST

## SOUTH

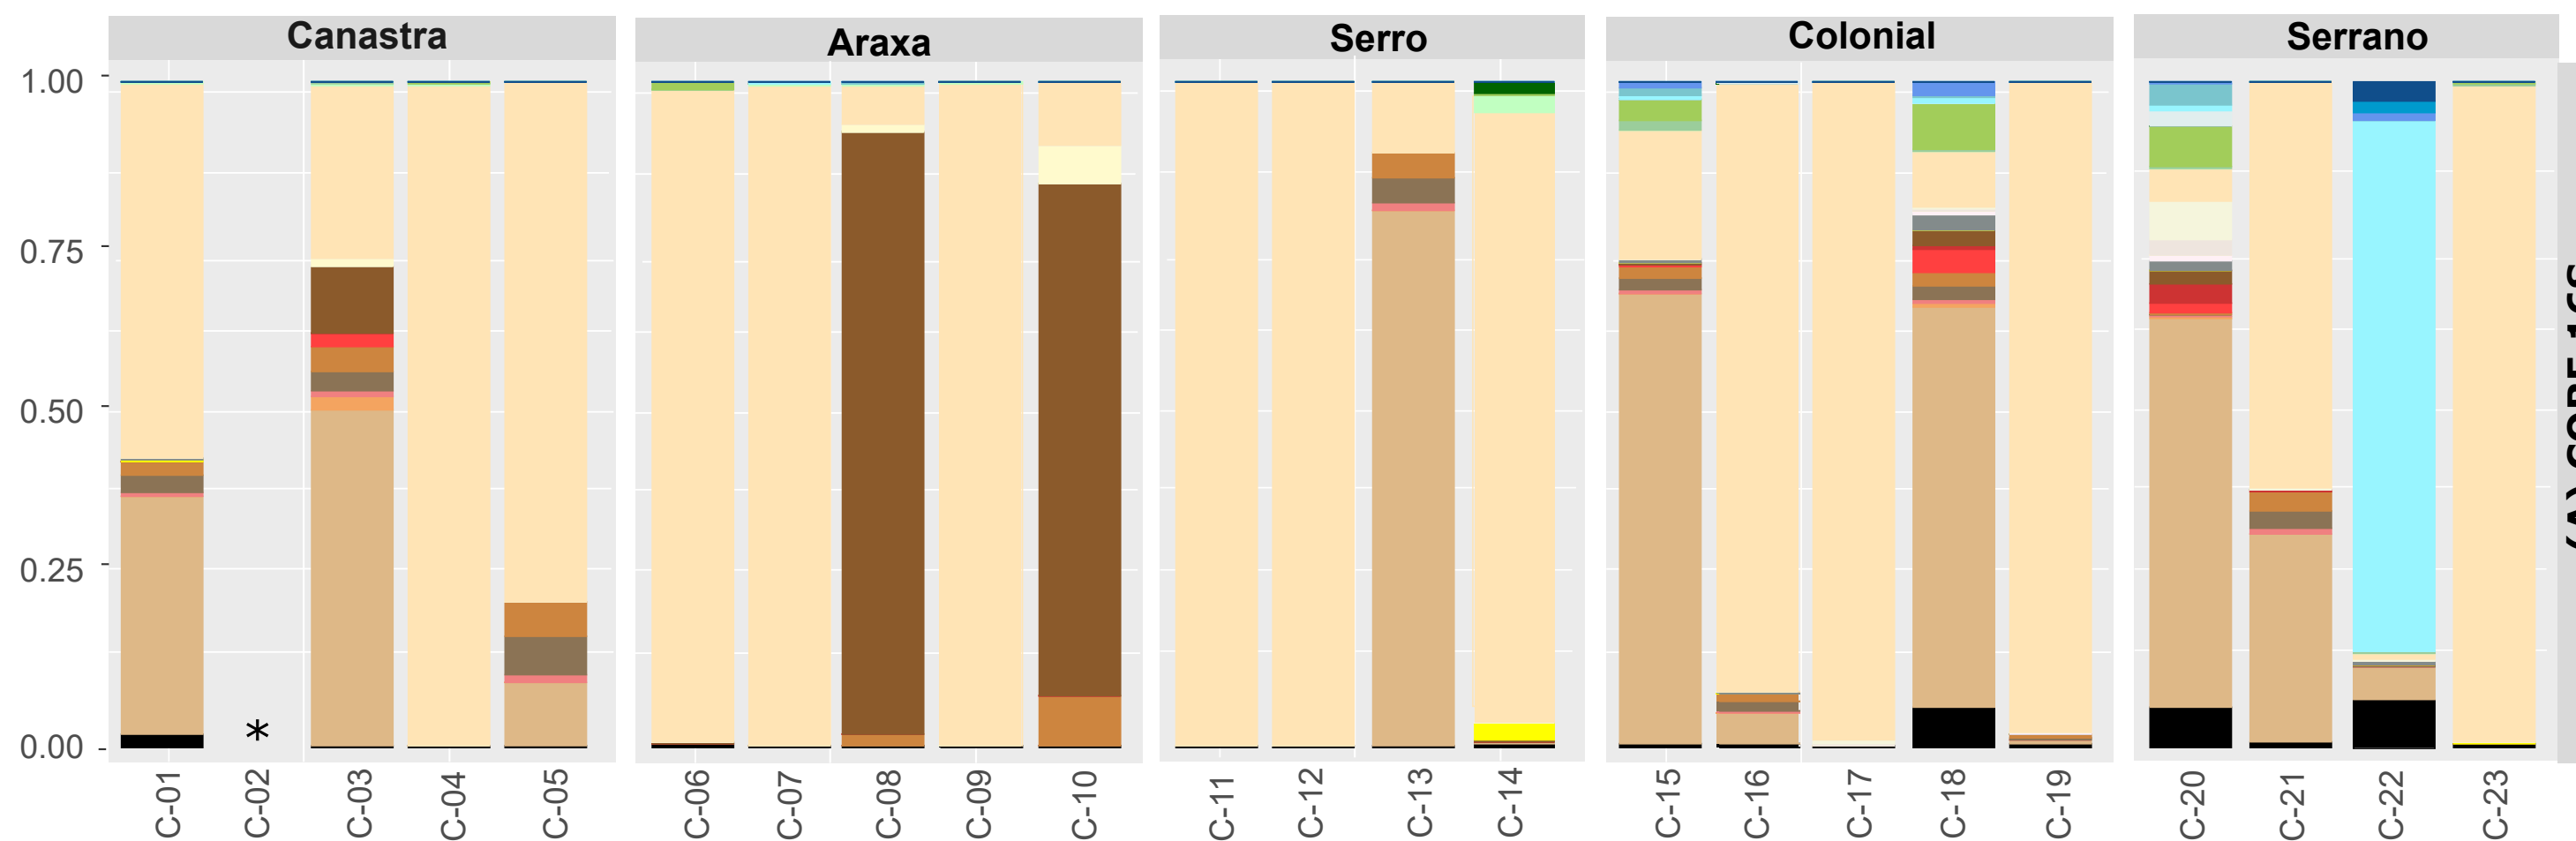

### Species

- Cobetia marina*
- Cobetia sp.*
- Enterobacter sp.*
- Escherichia coli*
- Kluyvera cryocrescens*
- Kurthia gibsonii*
- Levilactobacillus brevis*
- Lacticaseibacillus casei-paracasei*
- Lactobacillus delbrueckii*
- Lactiplantibacillus plantarum*
- Lactococcus lactis*
- Lactococcus piscium*
- Lactococcus raffinolactis* group
- Lactococcus sp. 1*
- Leuconostoc mesenteroides*
- Raoultella ornithinolytica*
- Staphylococcus aureus*
- Streptococcus equinus-lutetiensis-infantarius*
- Streptococcus parauberis*
- Streptococcus porcorum/sanguinis*
- Streptococcus sp. 1*
- Streptococcus sp. 2*
- Streptococcus sp. 3*
- Streptococcus sp. 4*
- Streptococcus thermophilus-salivarius*
- Other

(A) CORE 16S

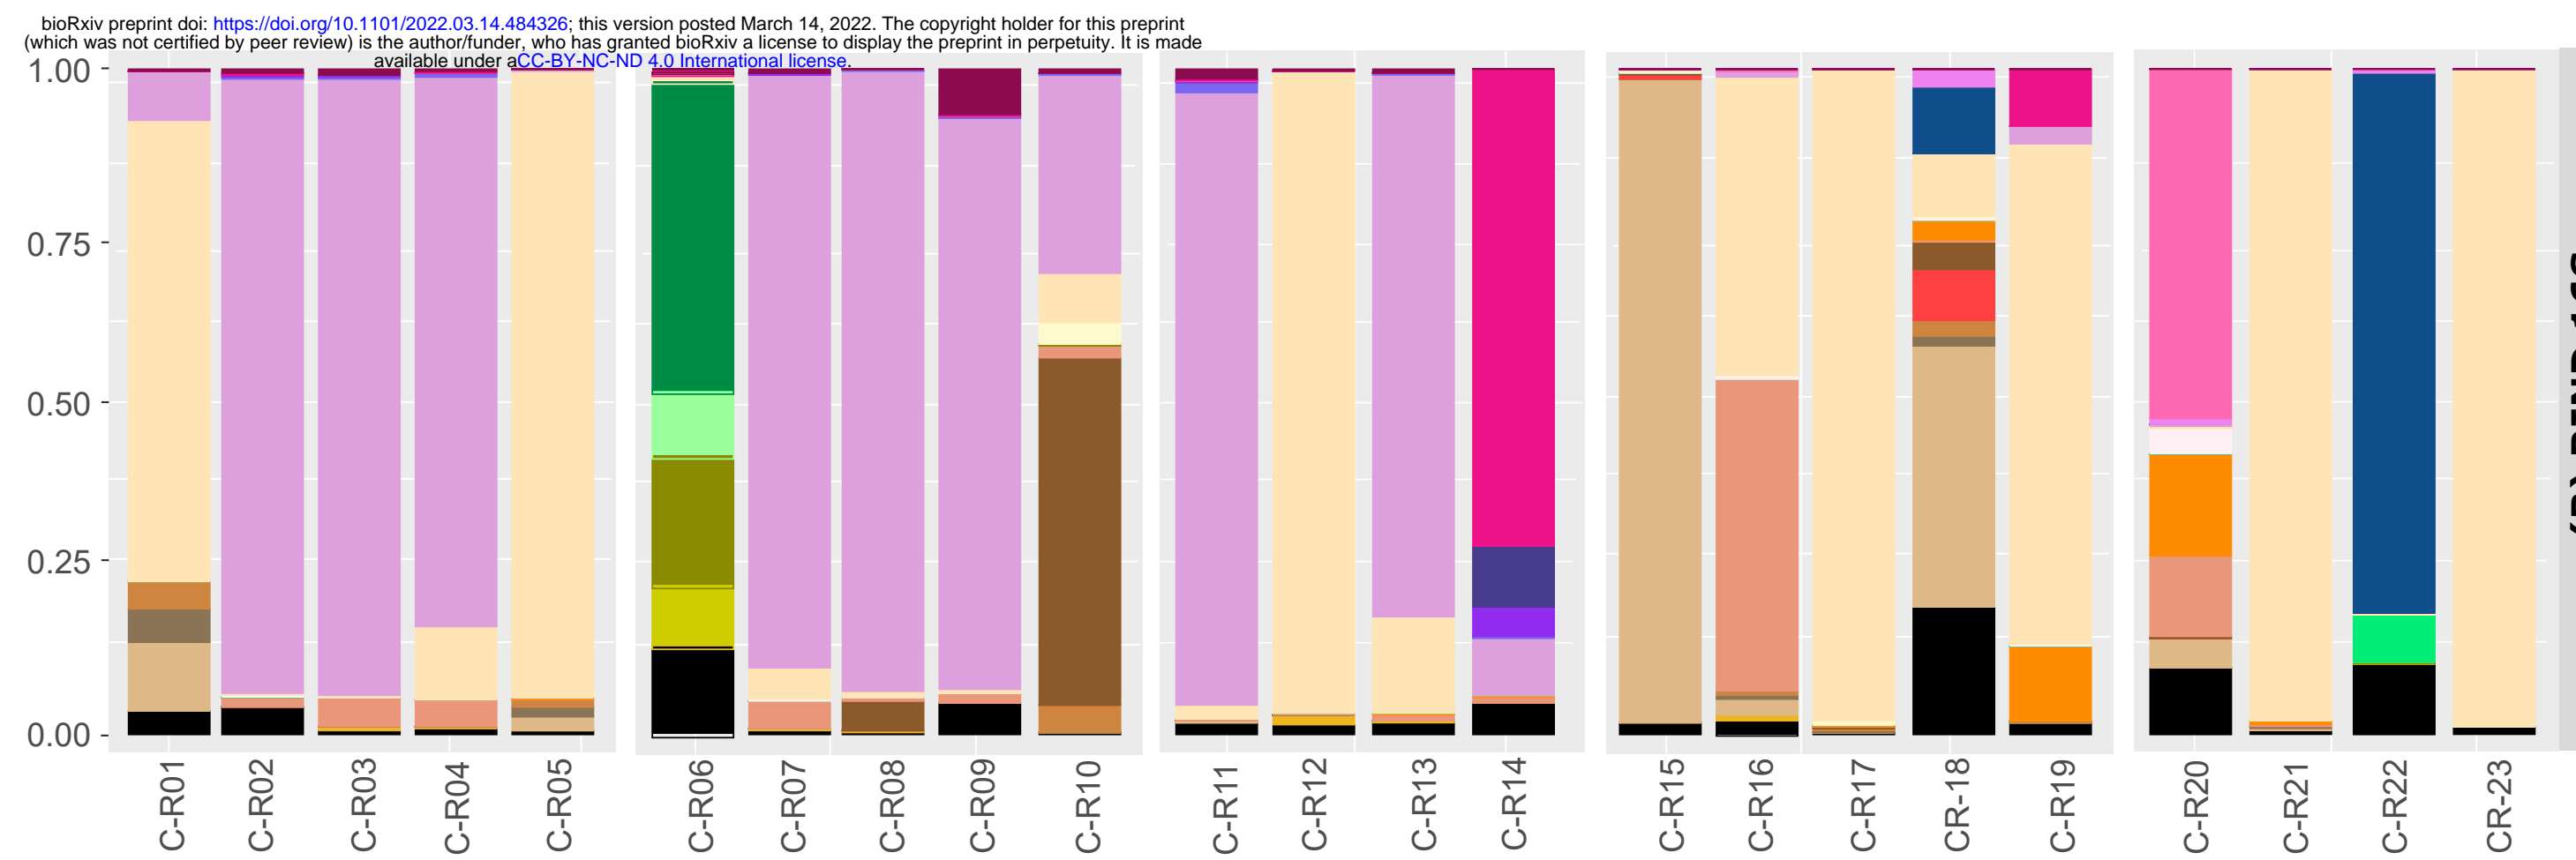

- Bavariicoccus seileri*
- Brevibacterium sp. 1*
- Celerinatantimonas sp.*
- Chromohalobacter canadensis*
- Cobetia marina*
- Corynebacterium glyciniphilum*
- Corynebacterium sp. 1*
- Corynebacterium sp. 2*
- Corynebacterium variabile*
- Lactococcus lactis*
- Lactococcus sp. 1*
- Leuconostoc mesenteroides*
- Providencia rettgeri*
- Psychrobacter sp. 1*
- Rouxiiella sp. 2*
- Serratia liquefaciens*
- Serratia sp.*
- Staphylococcus equorum*
- Staphylococcus saprophyticus*
- Streptococcus equinus-lutetiensis-infantarius*
- Streptococcus porcorum-sanguinis*
- Streptococcus sp. 1*
- Streptococcus sp. 2*
- Streptococcus thermophilus-salivarius*
- Weissella jogaejeotgali*
- Other

(B) RIND 16S

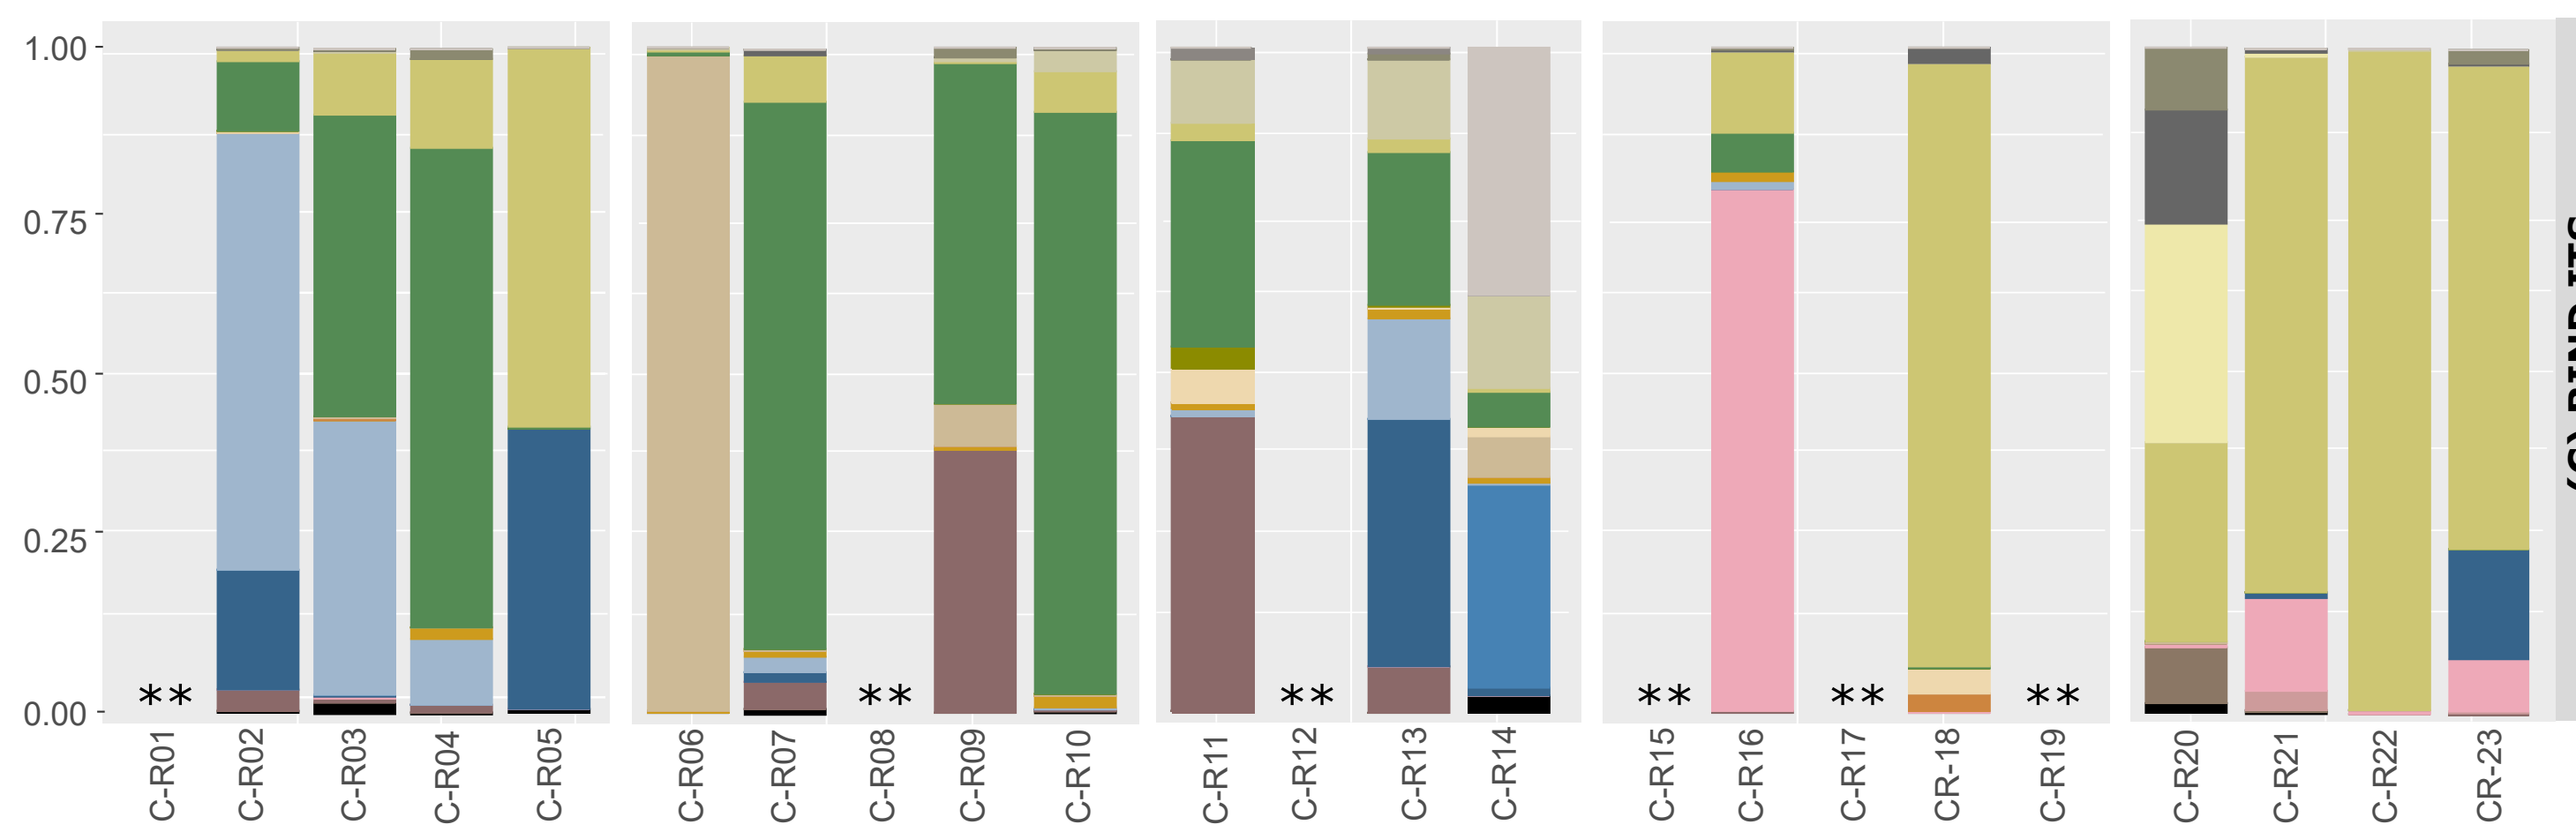

- Acremonium citrinum*
- Candida palmiroleophila*
- Candida parapsilosis*
- Candida zeylanoides*
- Clavispora lusitanae*
- Clavispora sp.*
- Debaryomyces hansenii*
- Diutina catenulata*
- Fusarium solani*
- Fusarium sp.*
- Geotrichum candidum*
- Gibberella intricans*
- Kluyveromyces lactis*
- Kodamaea ohmeri*
- Microascus brevicaulis*
- Moniliella sp.*
- Penicillium commune*
- Penicillium sp.*
- Trichosporon sp.*
- Yarrowia lipolytica*
- Other

(C) RIND ITS

Samples



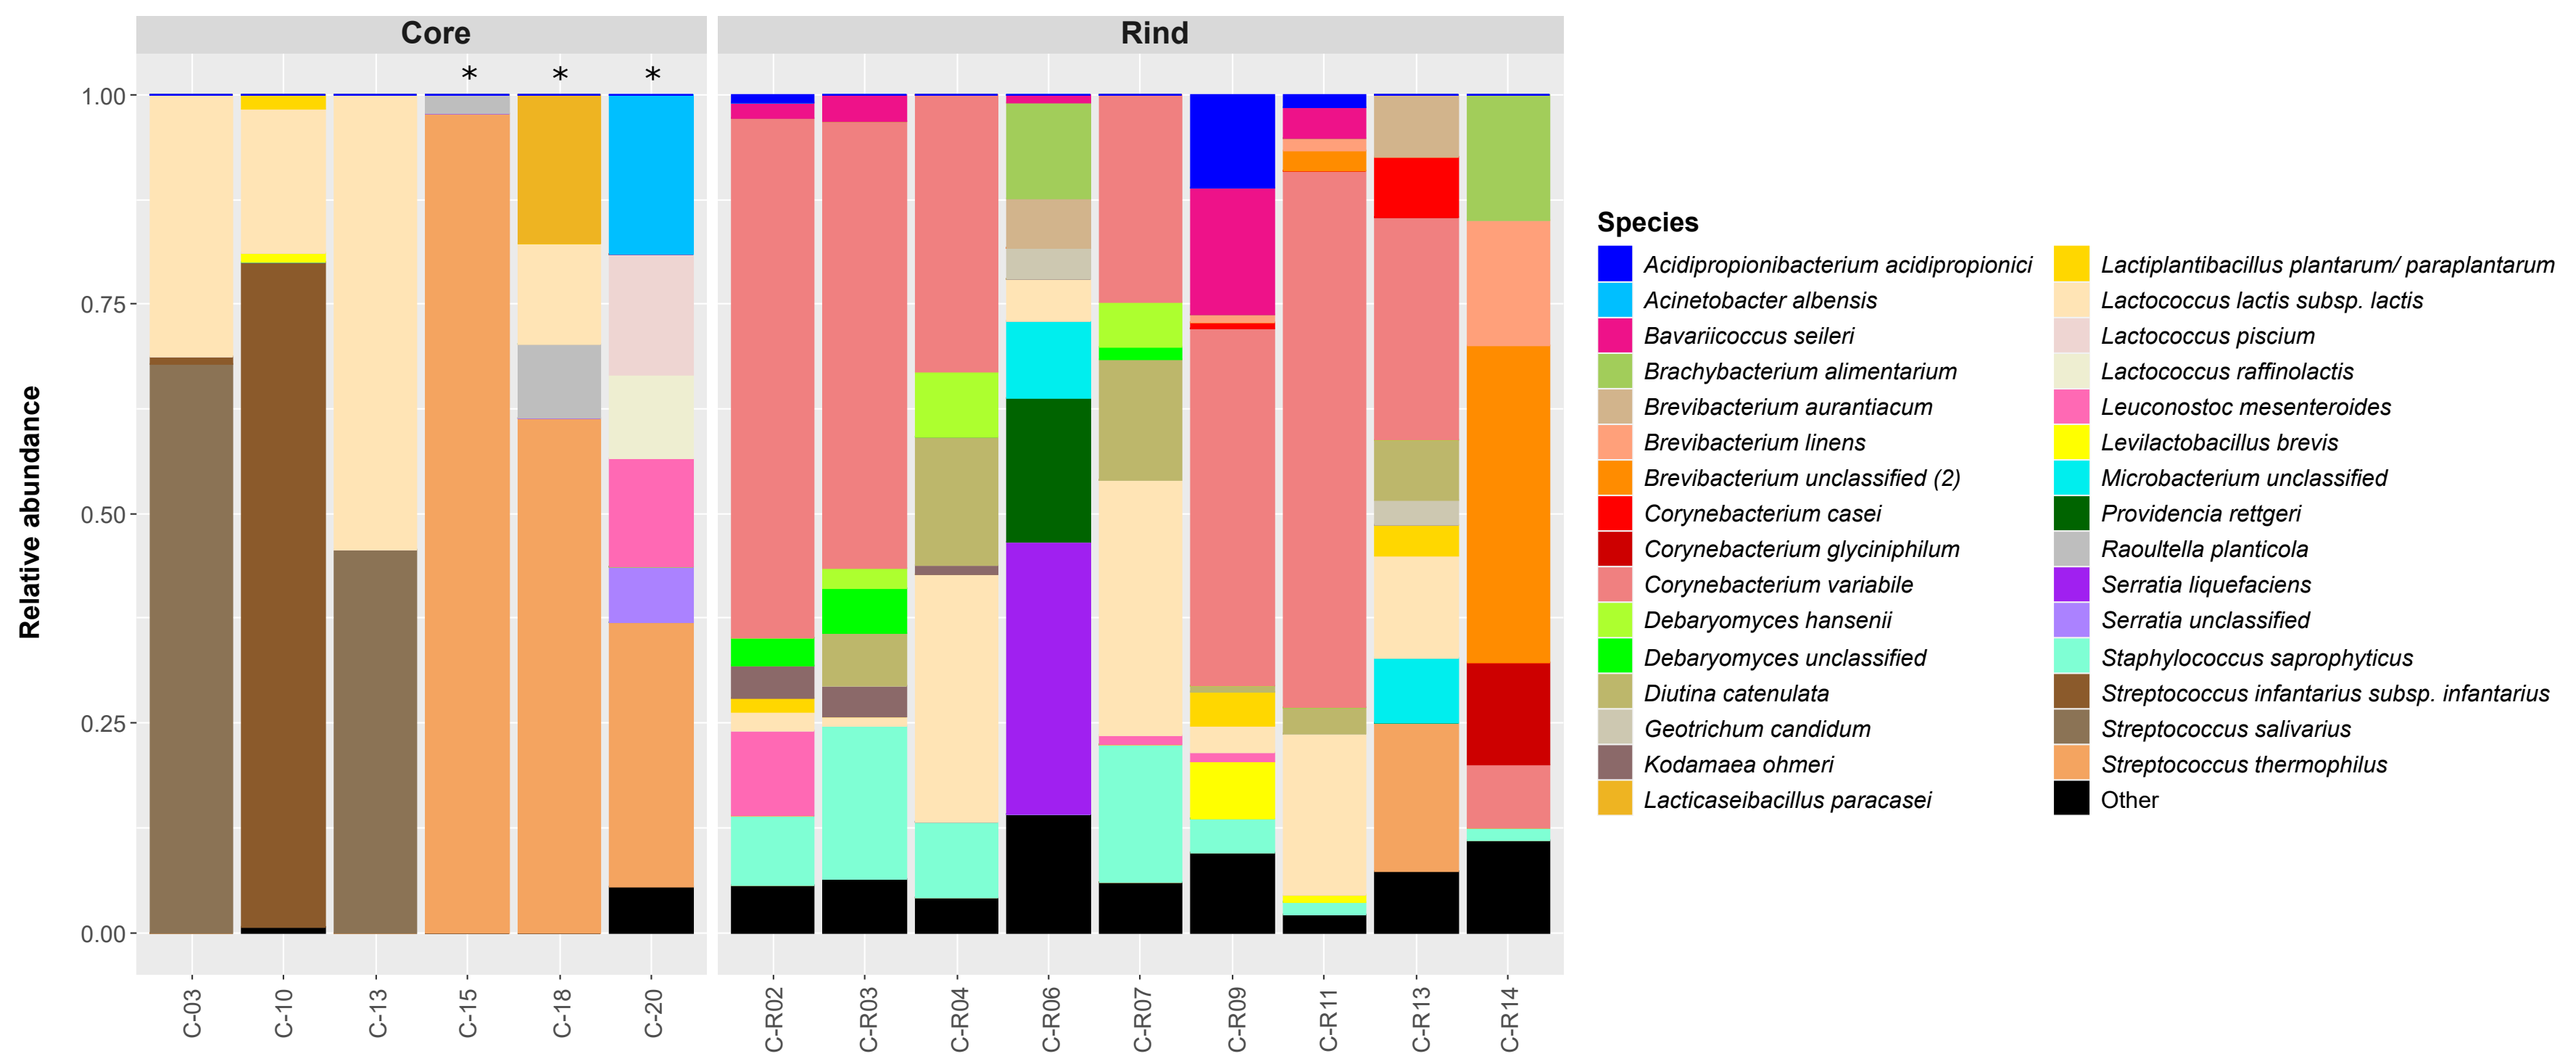

Reads/kb

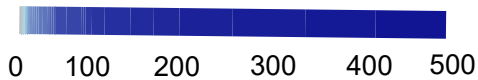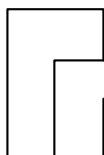

**Genes**

**Antibiotic class**

| Gene       | Antibiotic class  |
|------------|-------------------|
| APH(6)-I   | Aminoglycoside    |
| APH(3'')-I |                   |
| AADA       | Beta-lactam       |
| ACT        |                   |
| blaz       | Diaminopyrimidine |
| dfrA1      |                   |
| dfrD       | Fluoroquinolone   |
| dfrK       |                   |
| qnrS       | Fosfomycin        |
| qnrD1      |                   |
| fosA       | MLS               |
| ermB       |                   |
| ermC       | Nucleoside        |
| erm(43)    |                   |
| InuA       | Peptide           |
| mphC       |                   |
| SAT-4      | Sulfonamide       |
| pmrF       |                   |
| sul1       | Tetracycline      |
| sul2       |                   |
| tet38      | Tetracycline      |
| tet39      |                   |
| tet41      |                   |
| tetB       |                   |
| tetJ       |                   |
| tetK       |                   |
| tetL       |                   |
| tetM       |                   |
| tetS       |                   |
| tetY       |                   |

**Samples**

C-R02 C-R06 C-R07 C-15 C-R14 C-R13 C-18 C-R03 C-20 C-13 C-10 C-R11 C-R09 C-03 C-R04

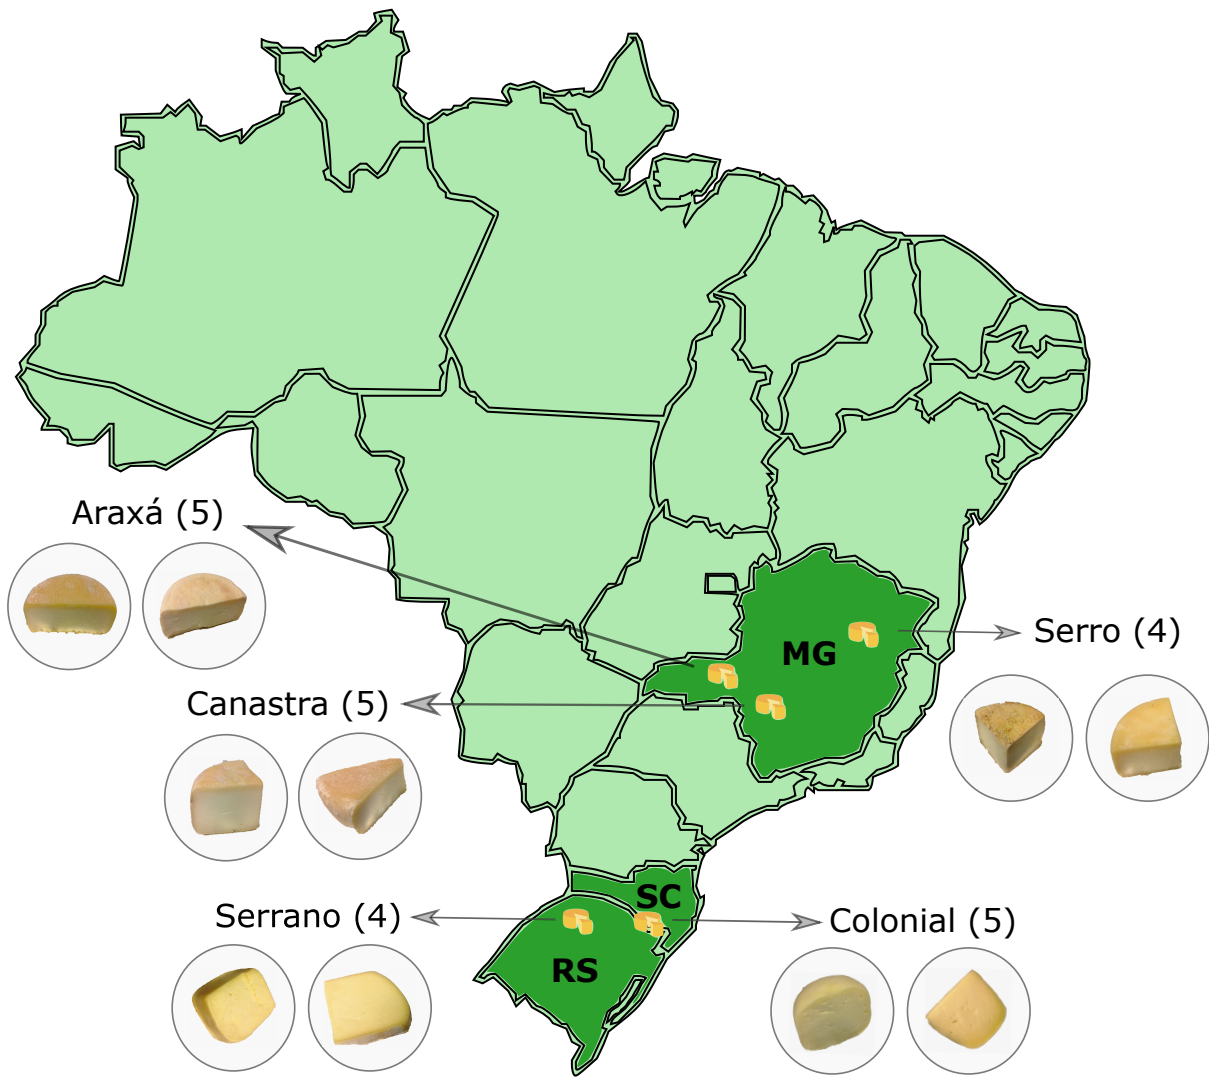

**(A) CORE 16S**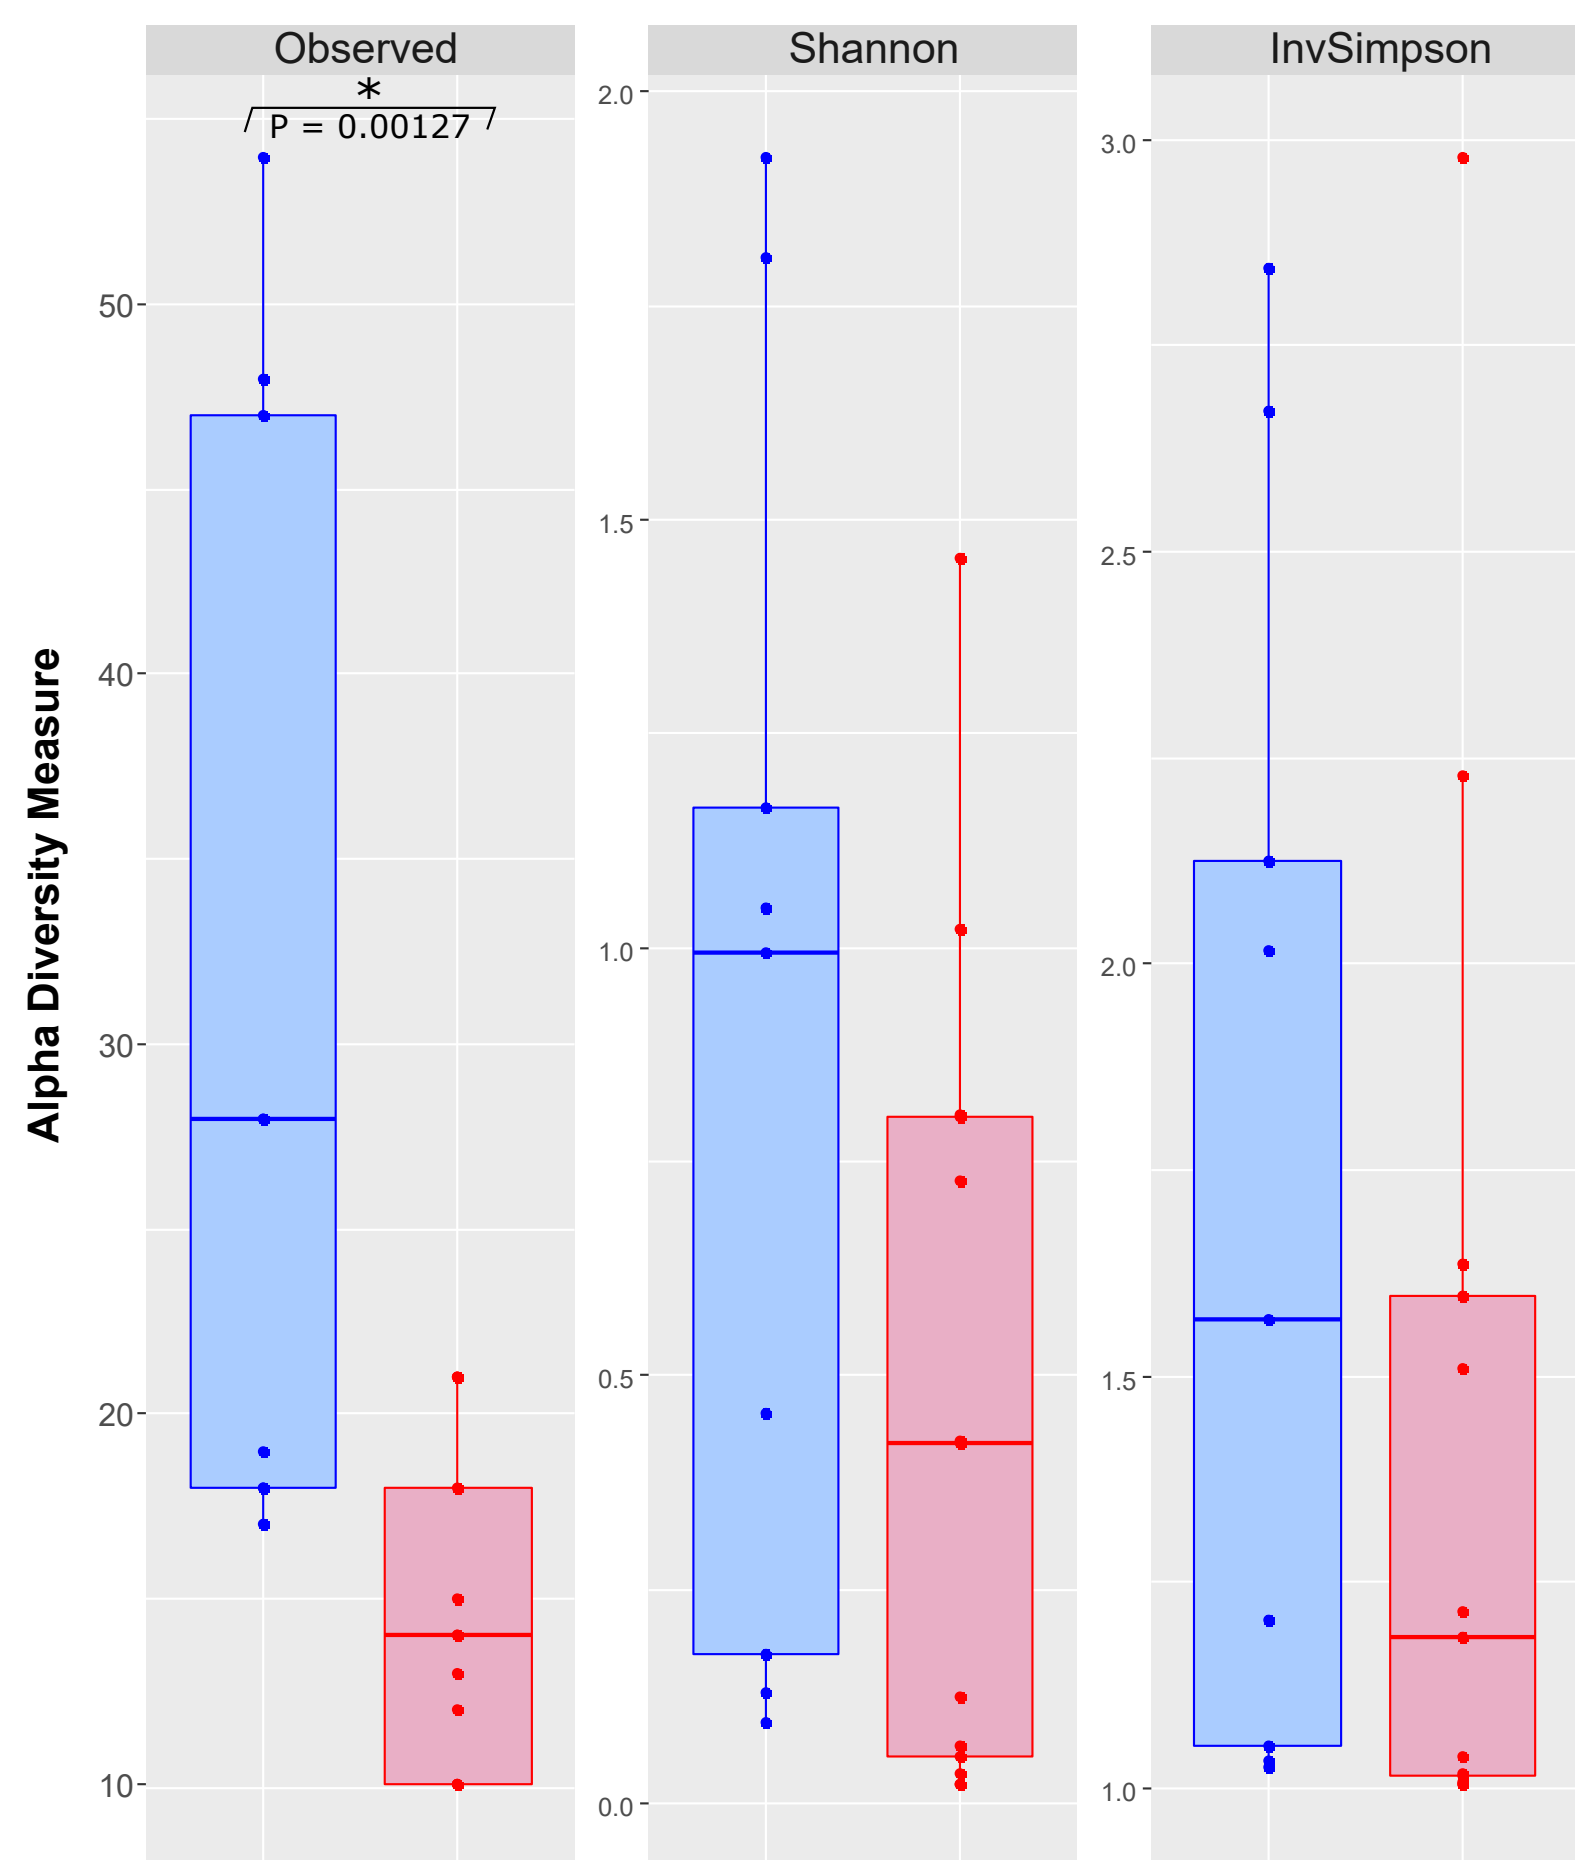**(B) RIND 16S**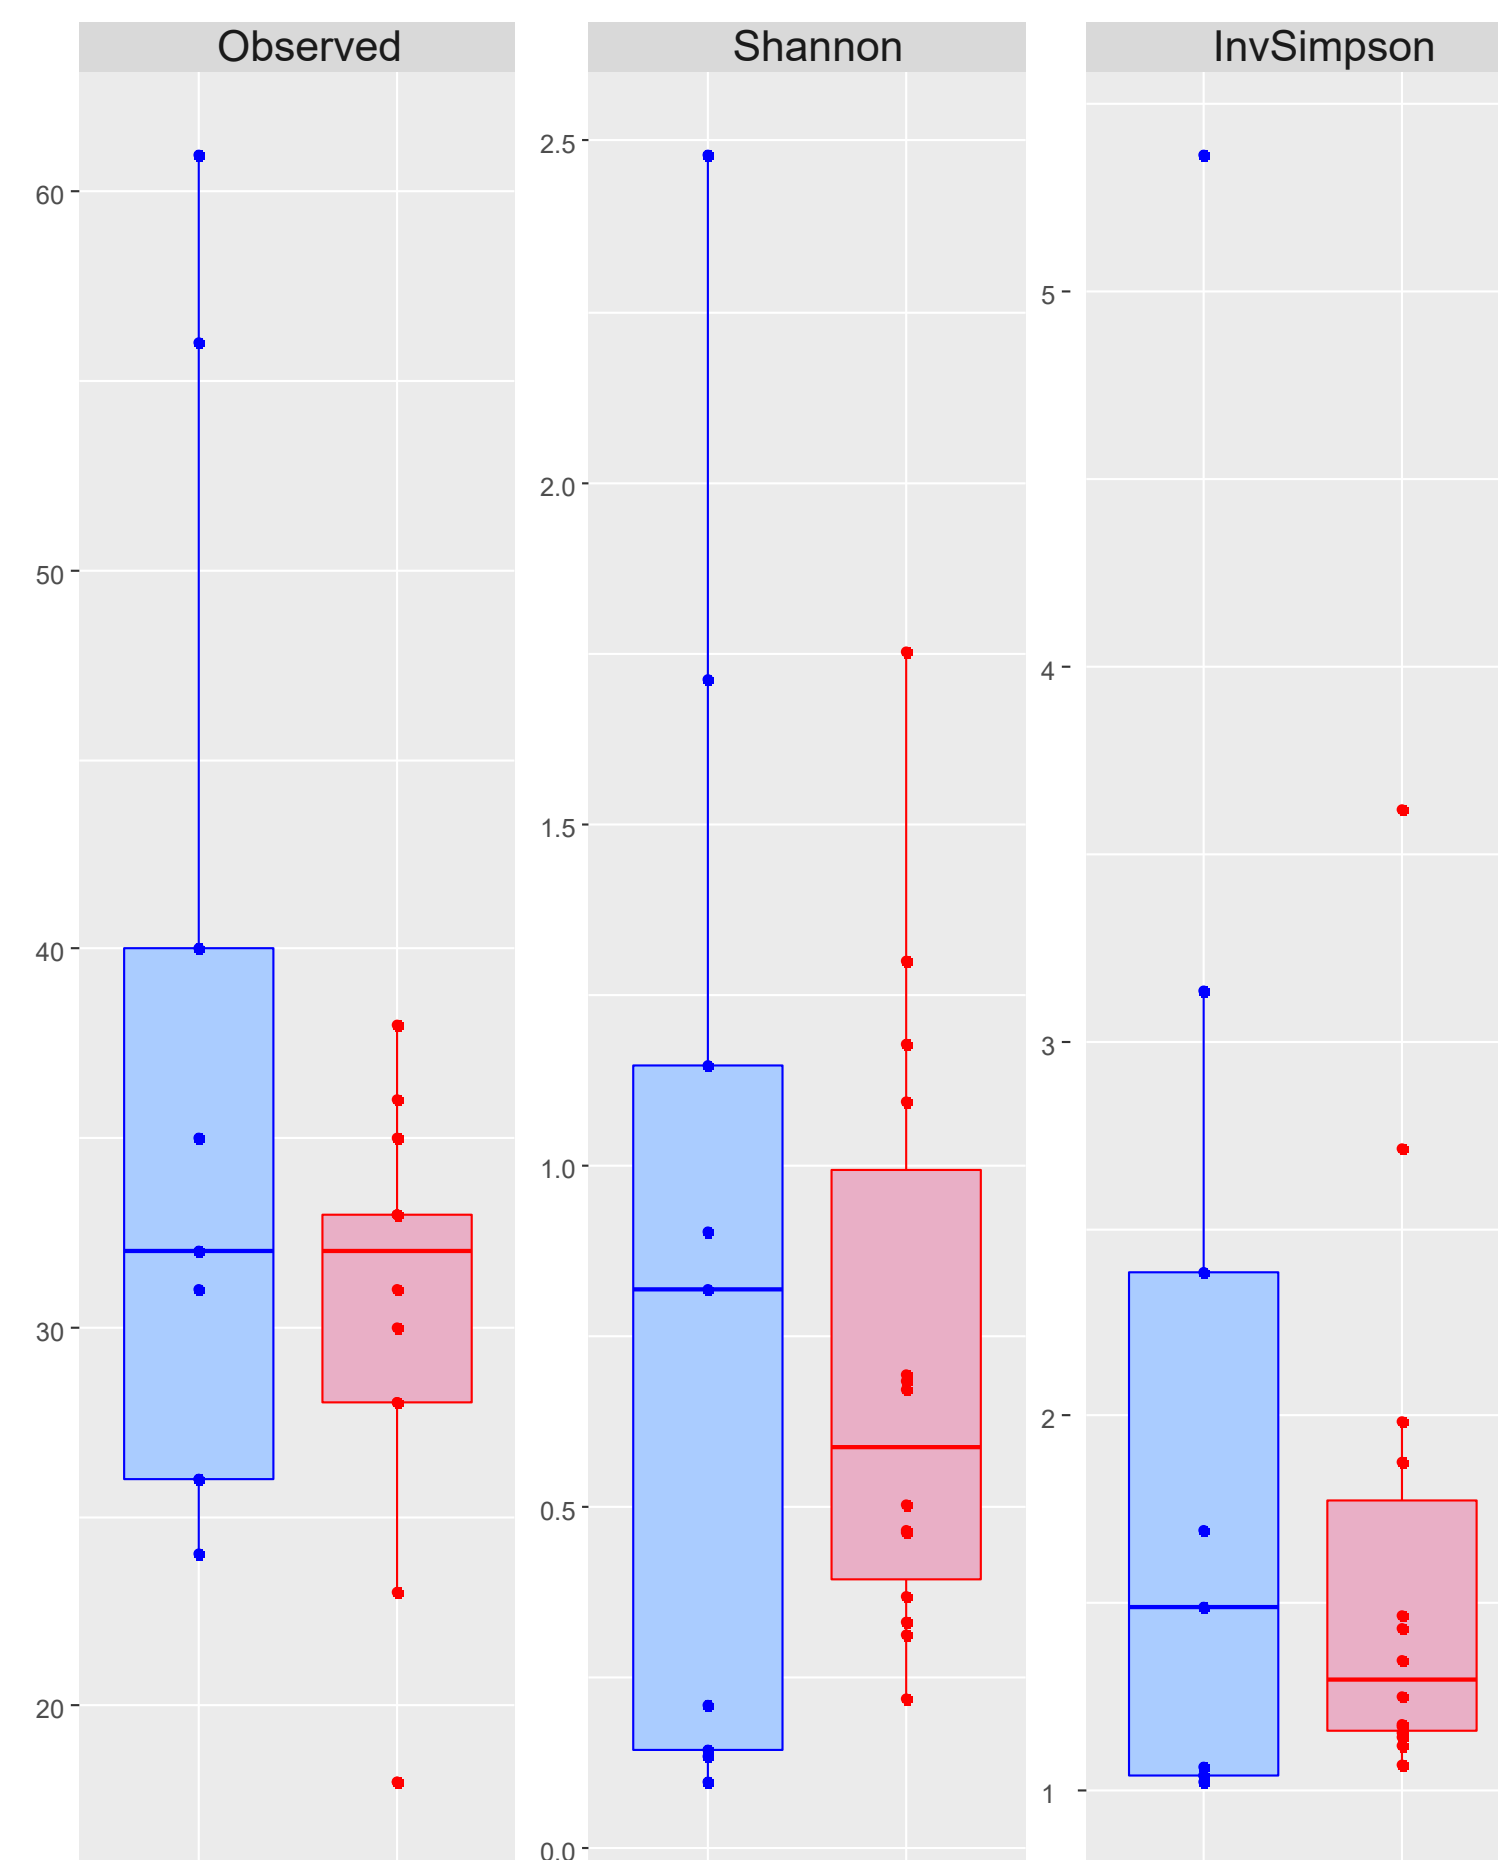**(C) RIND ITS**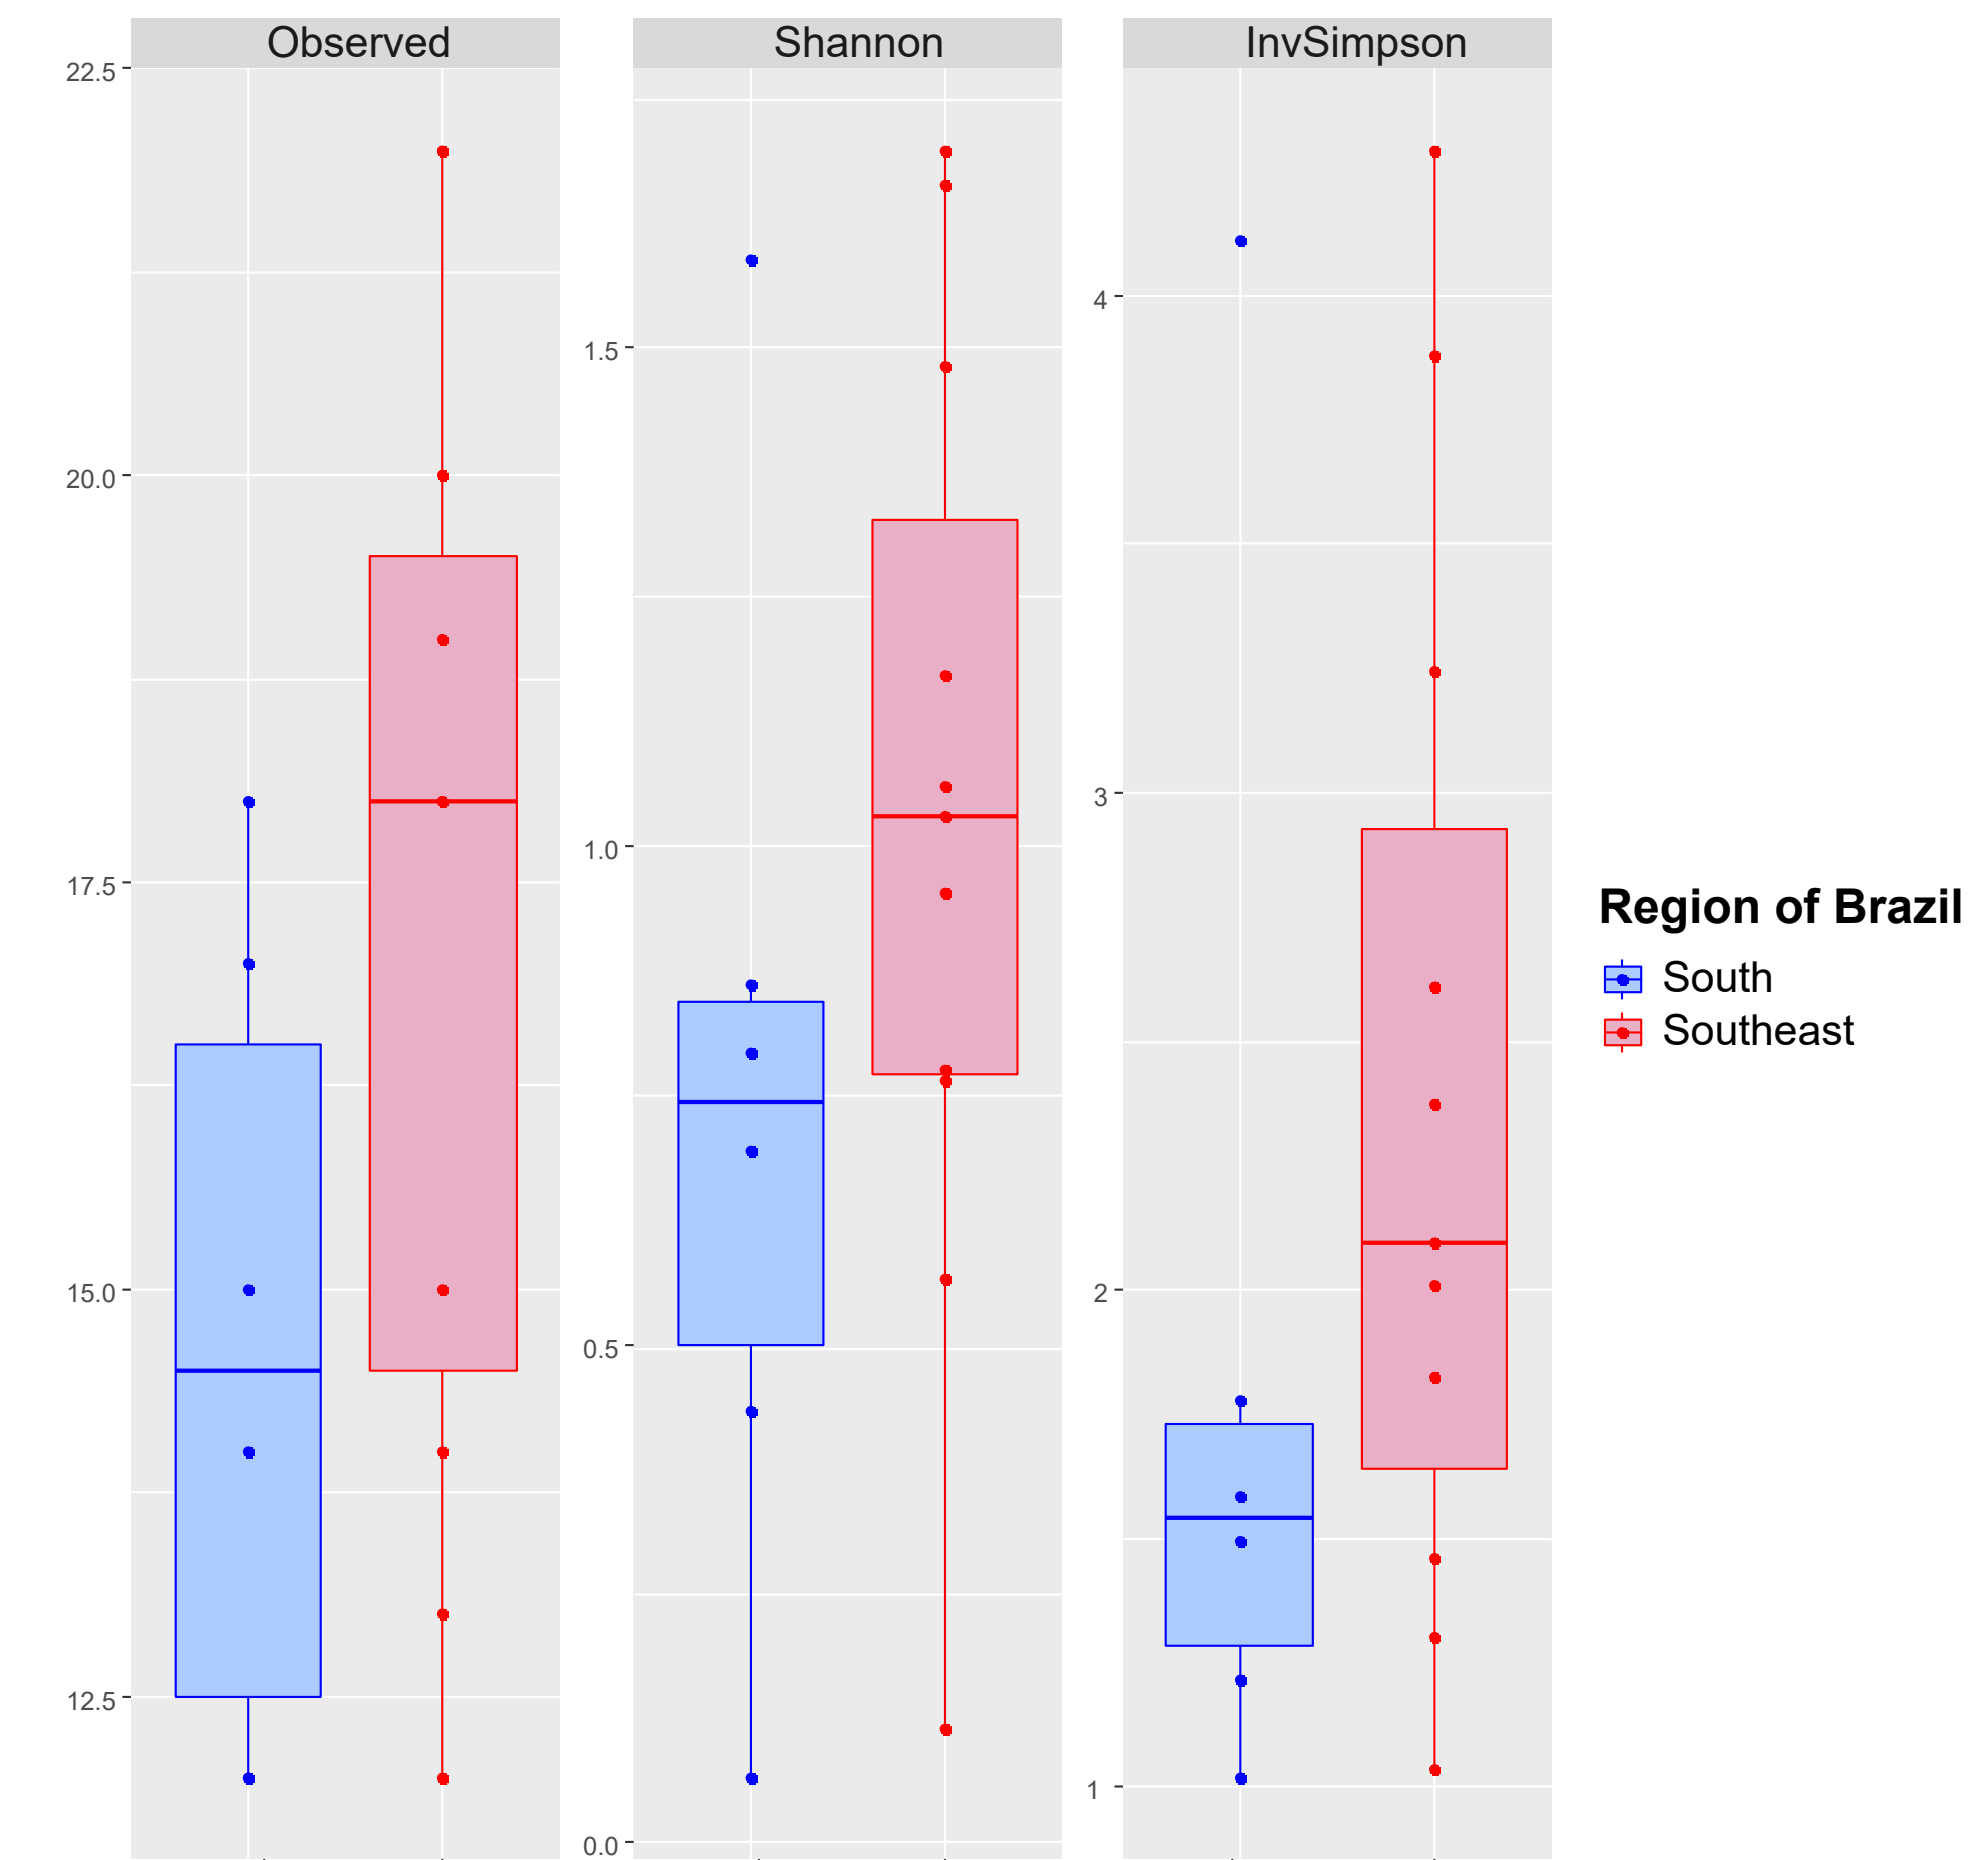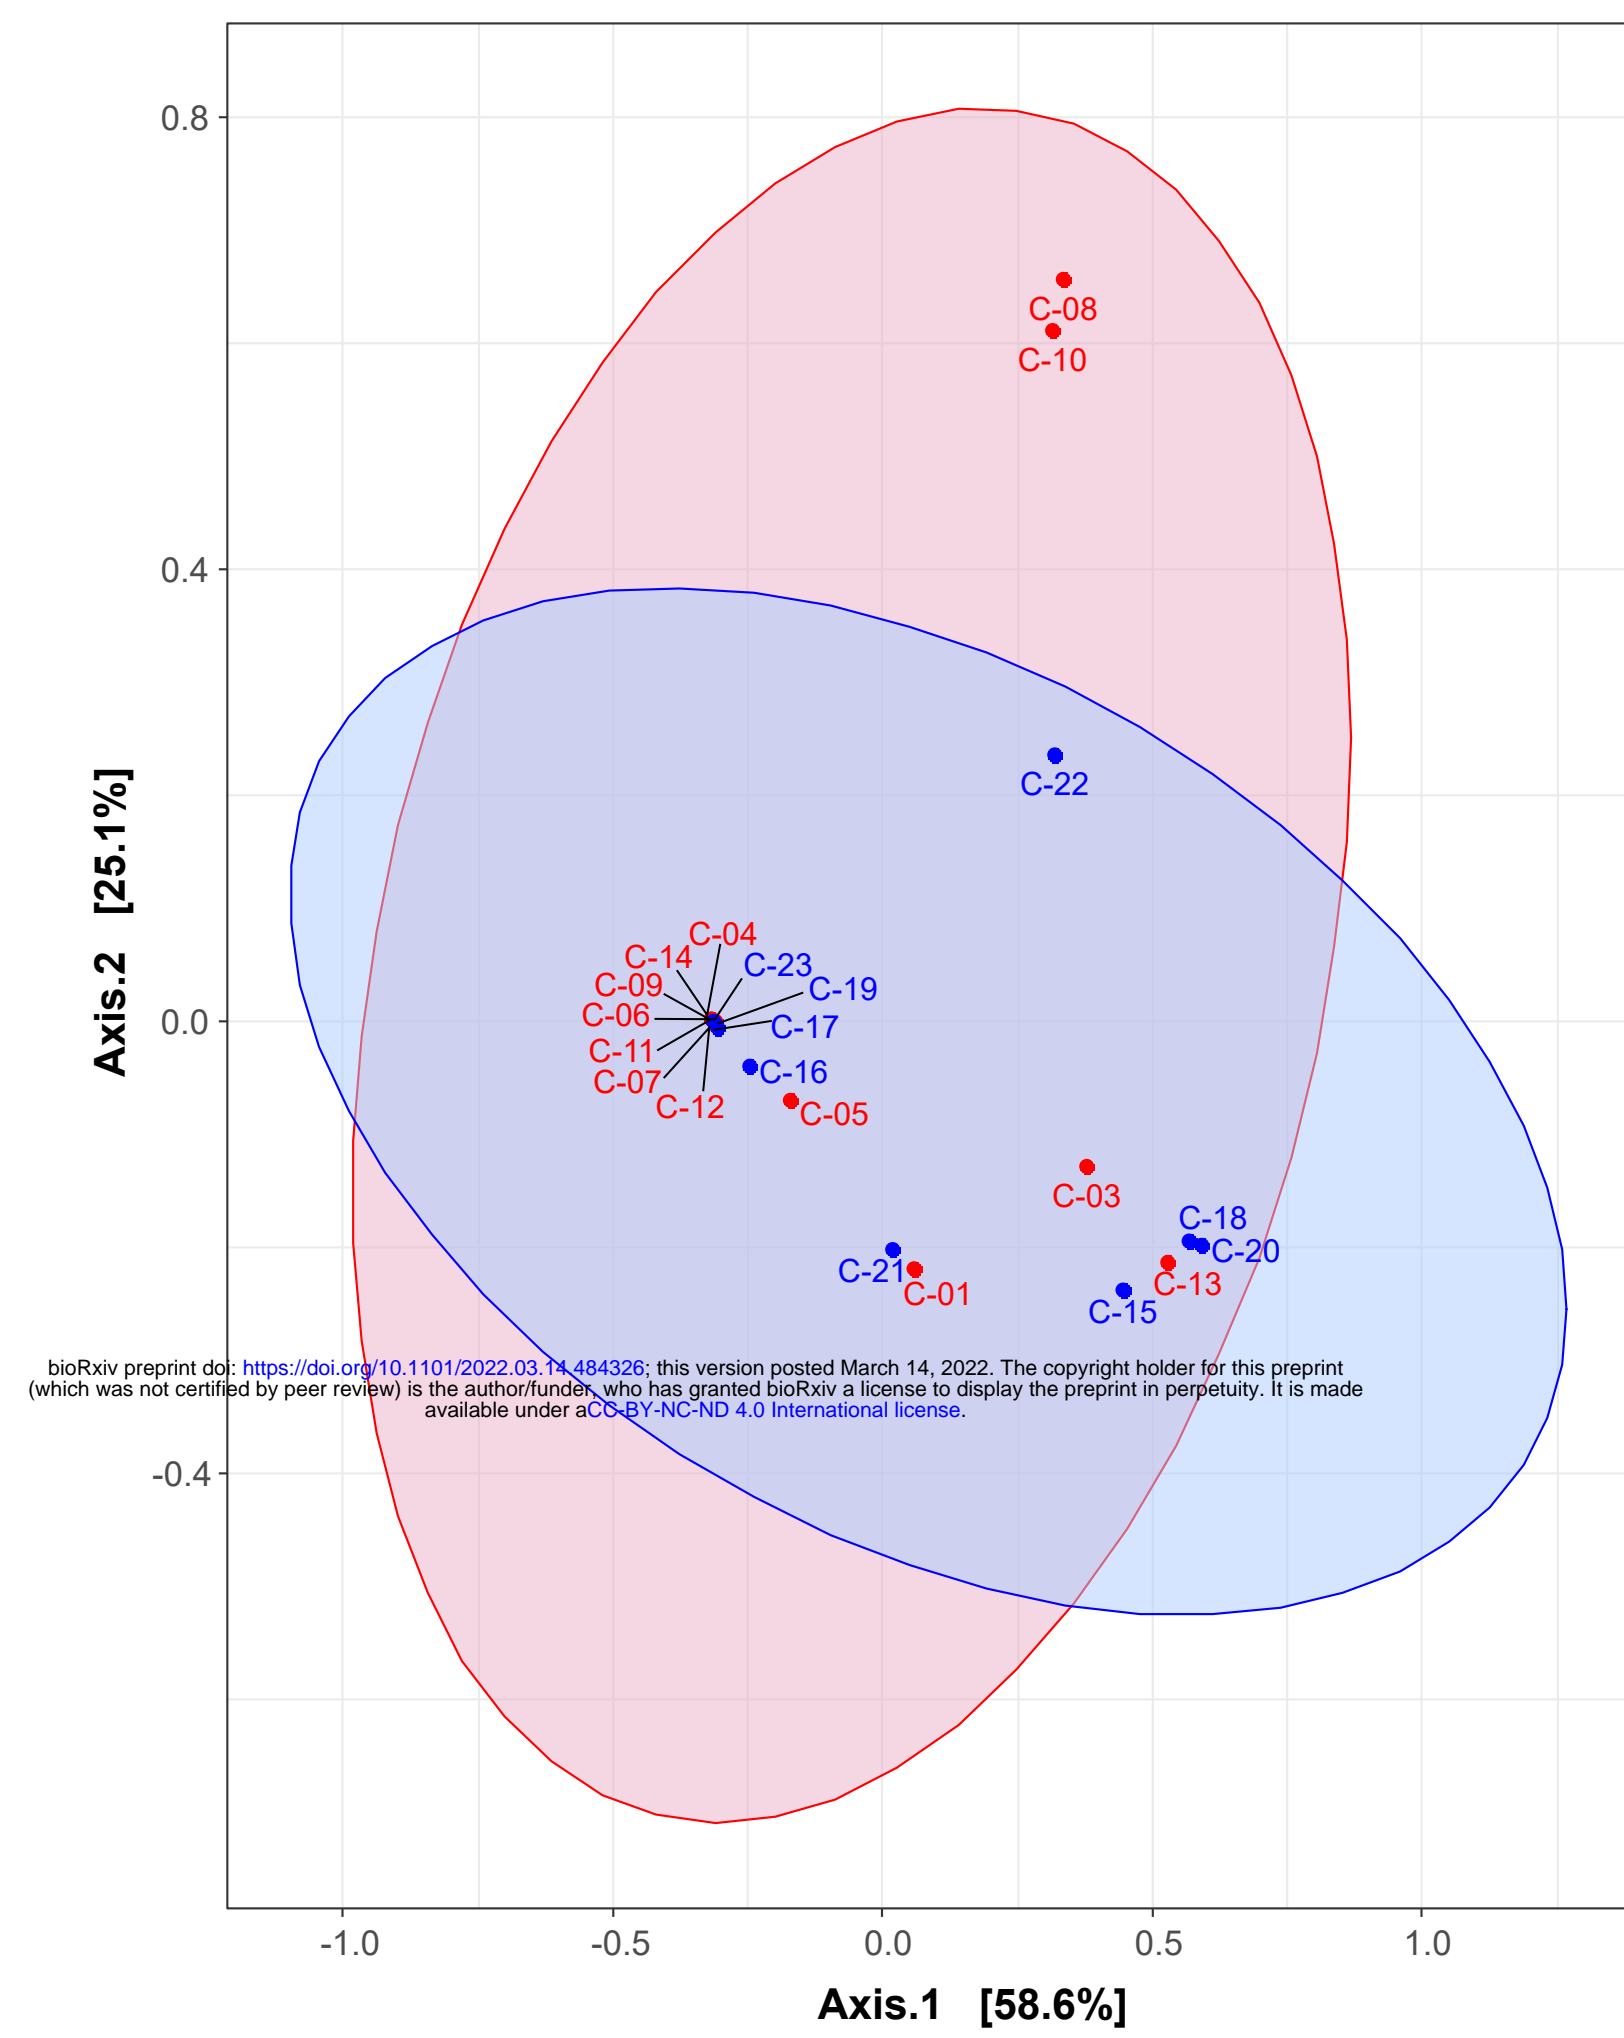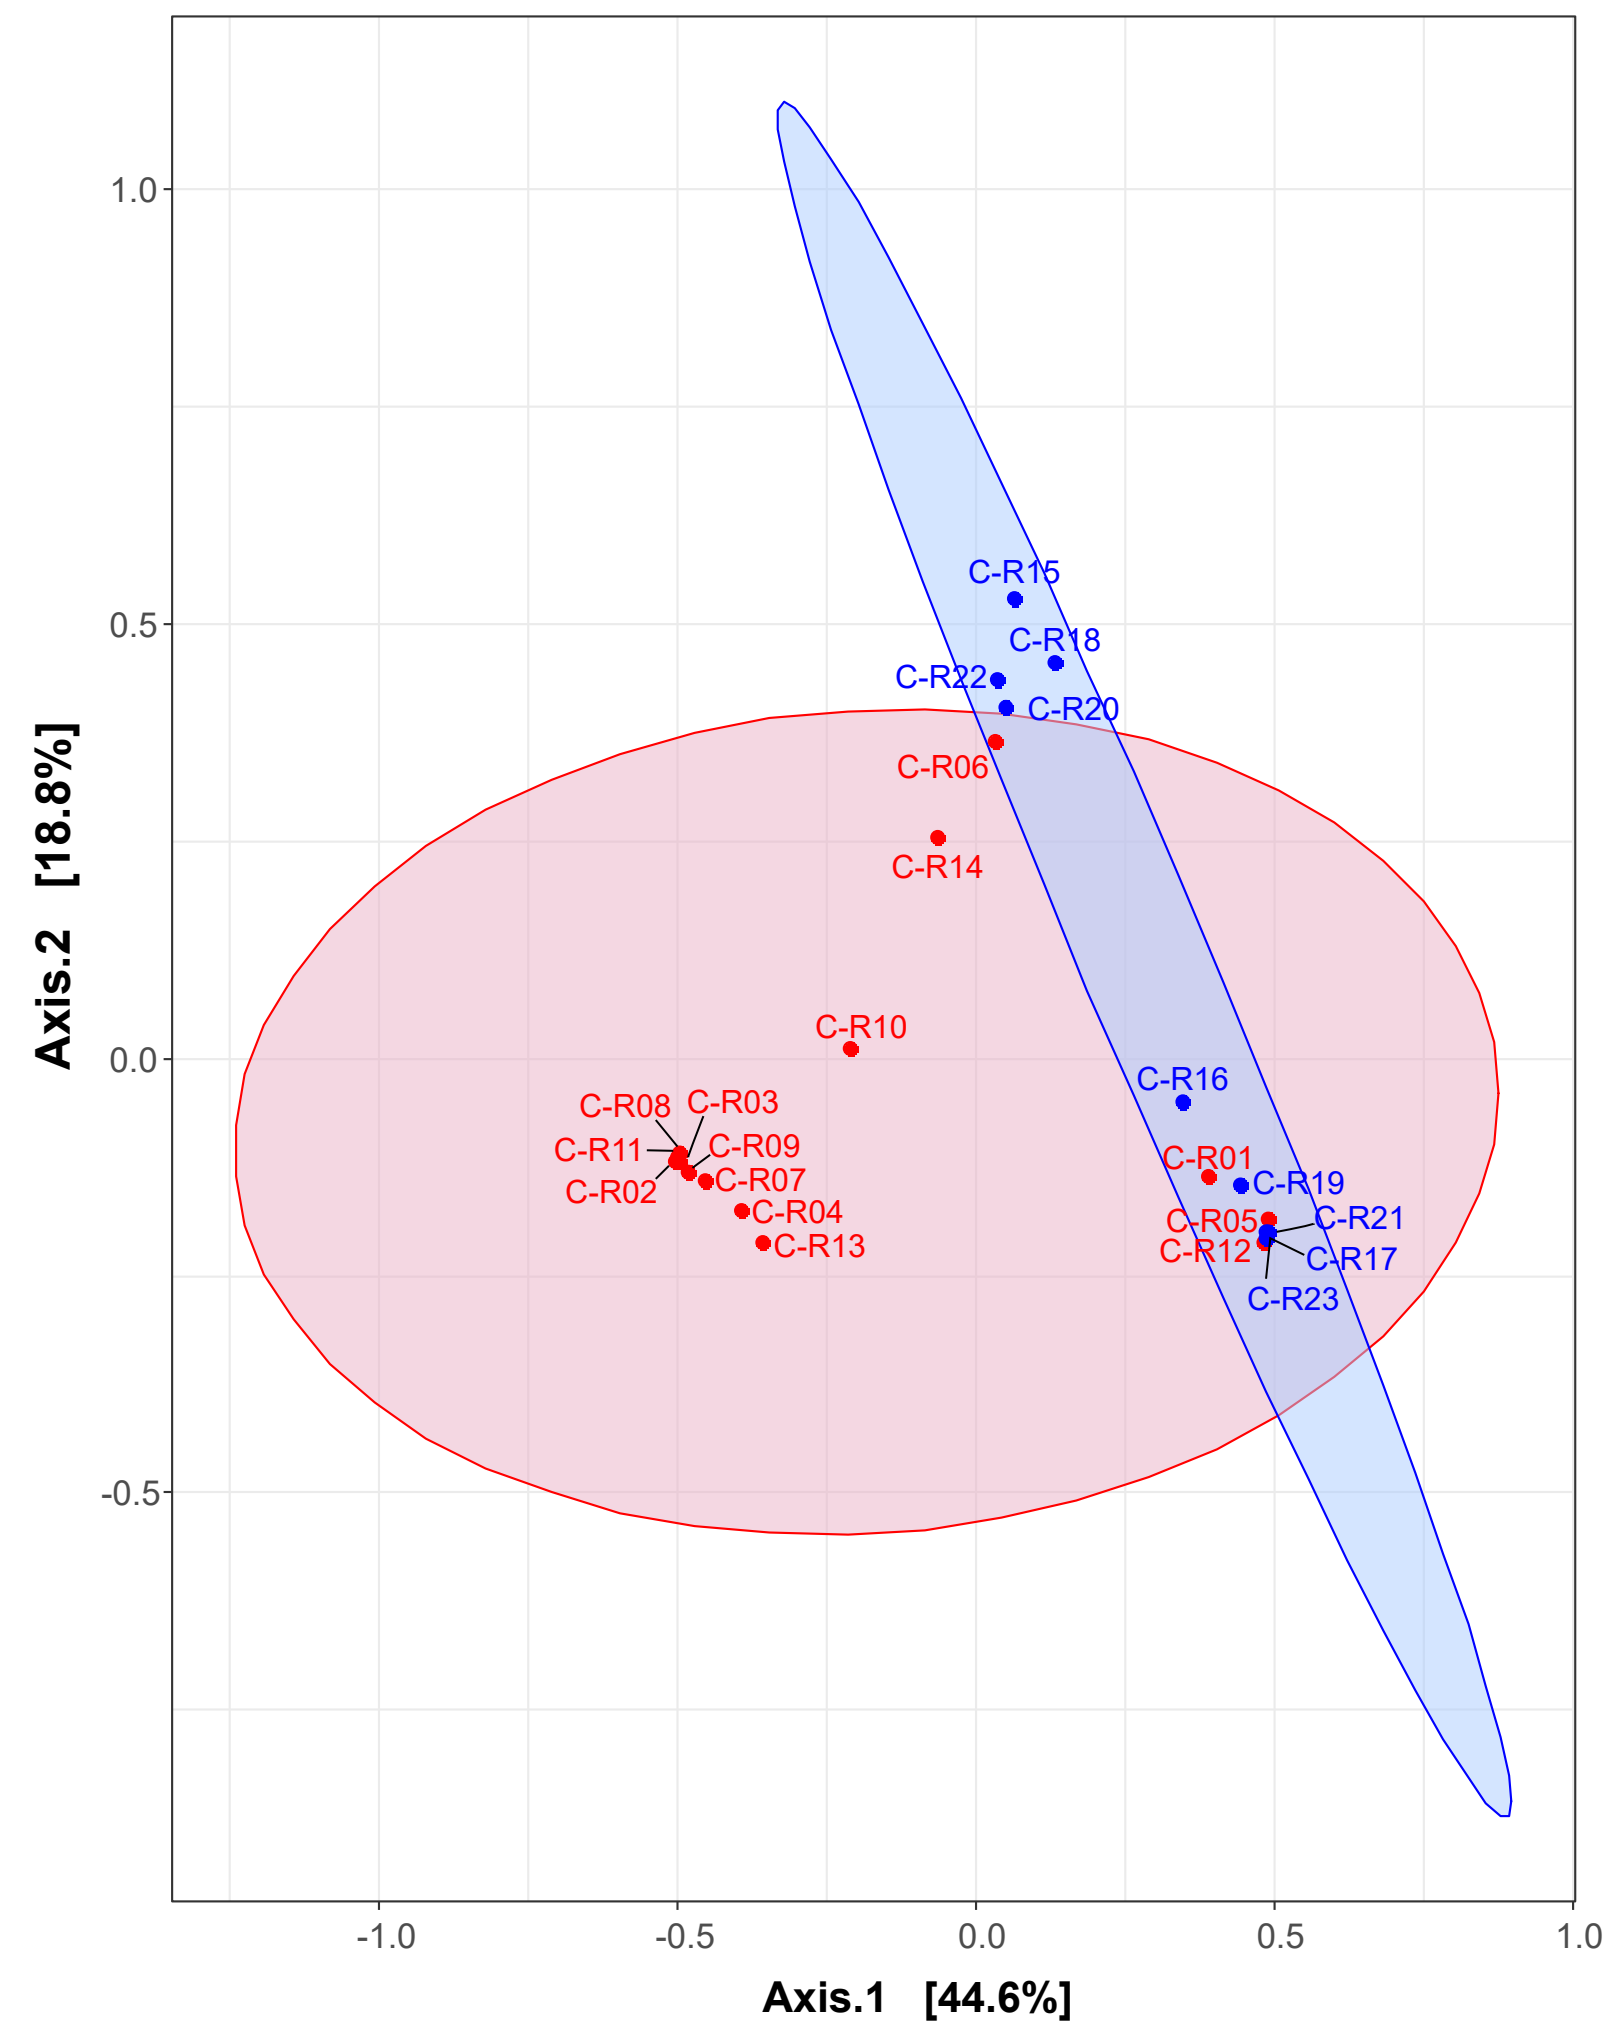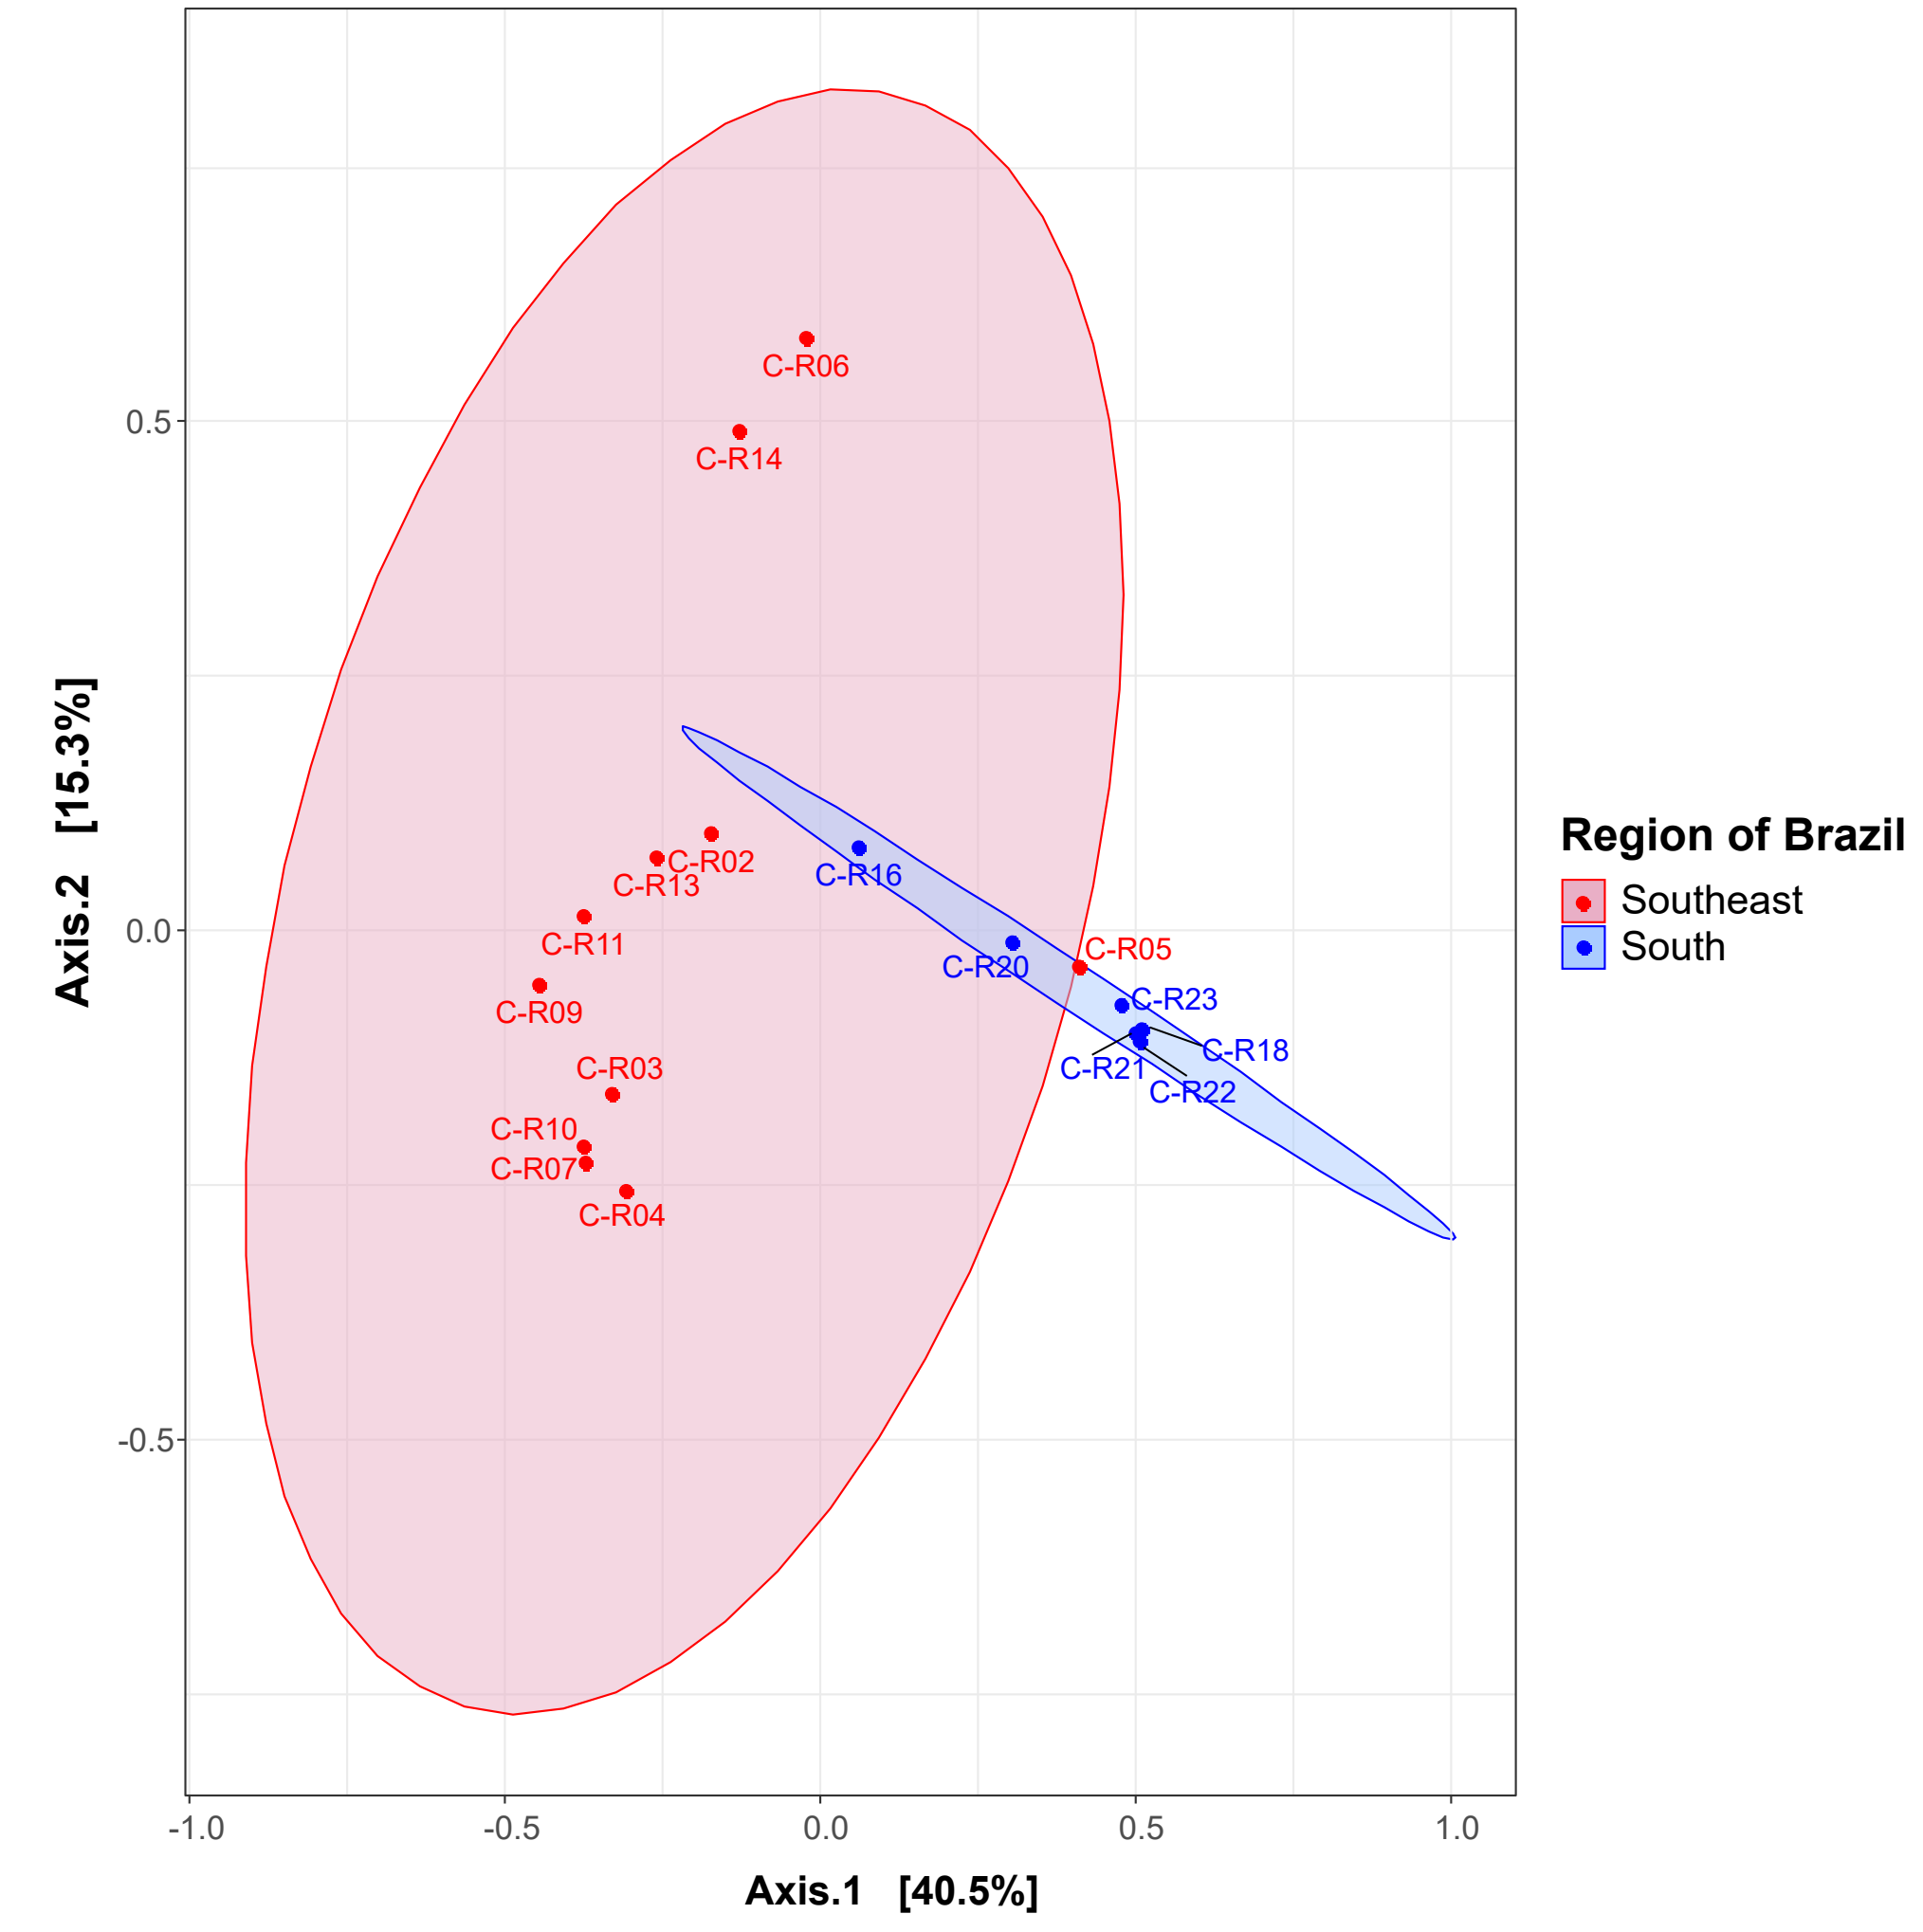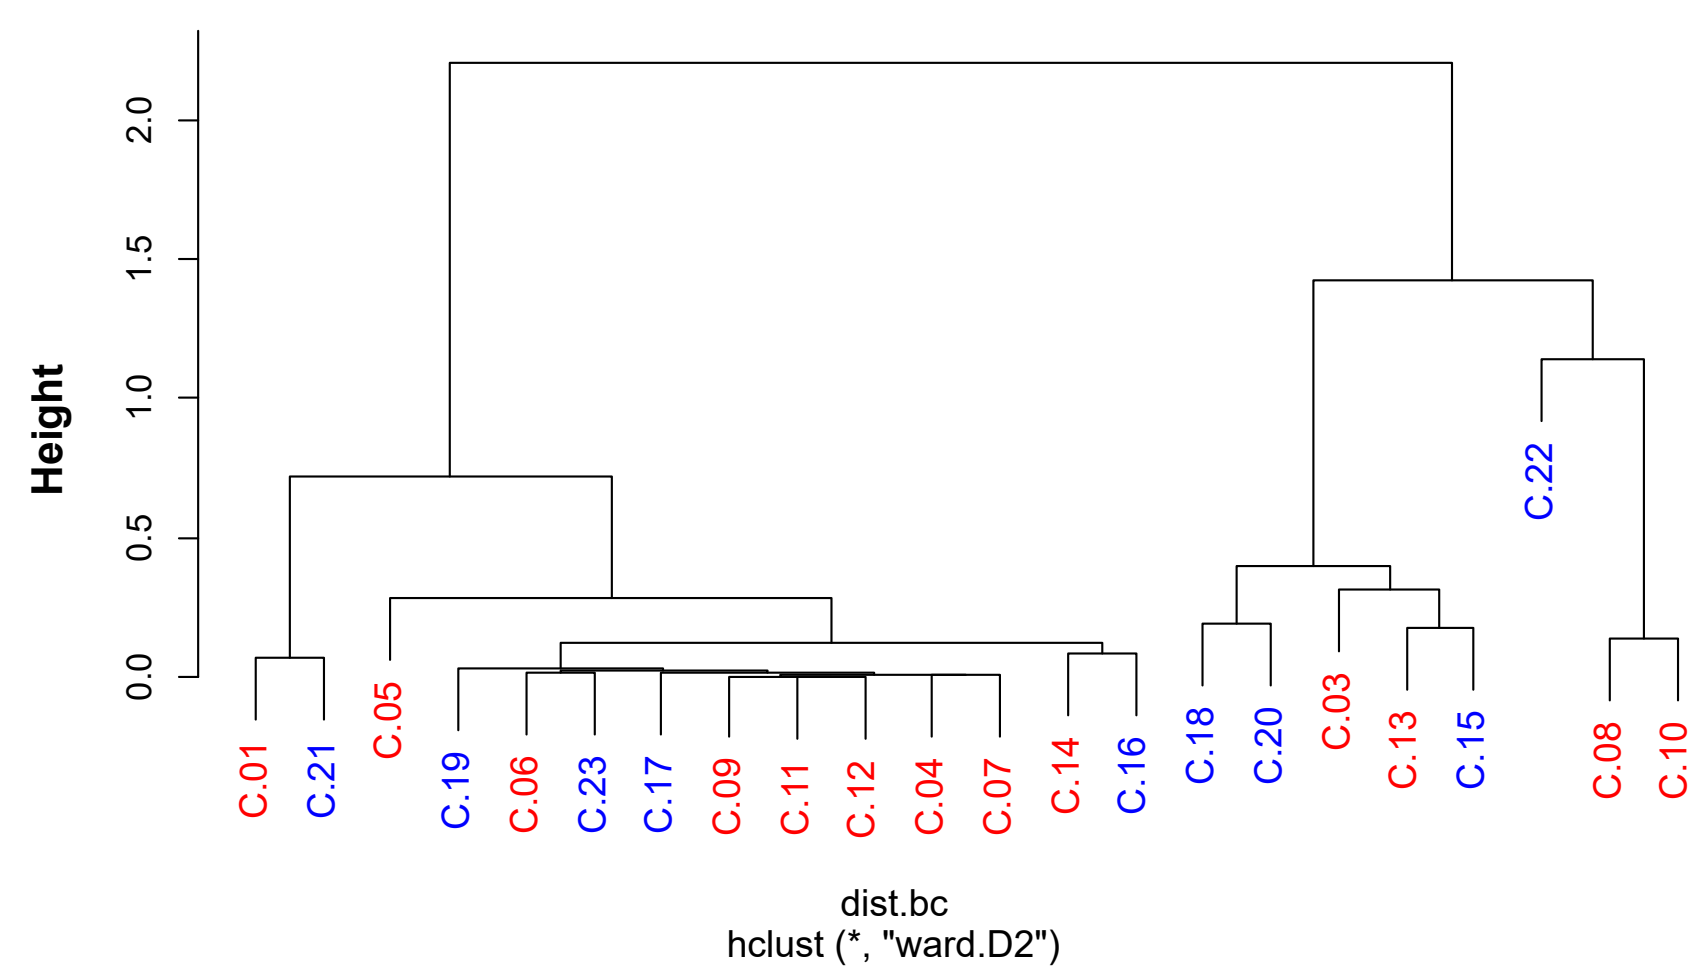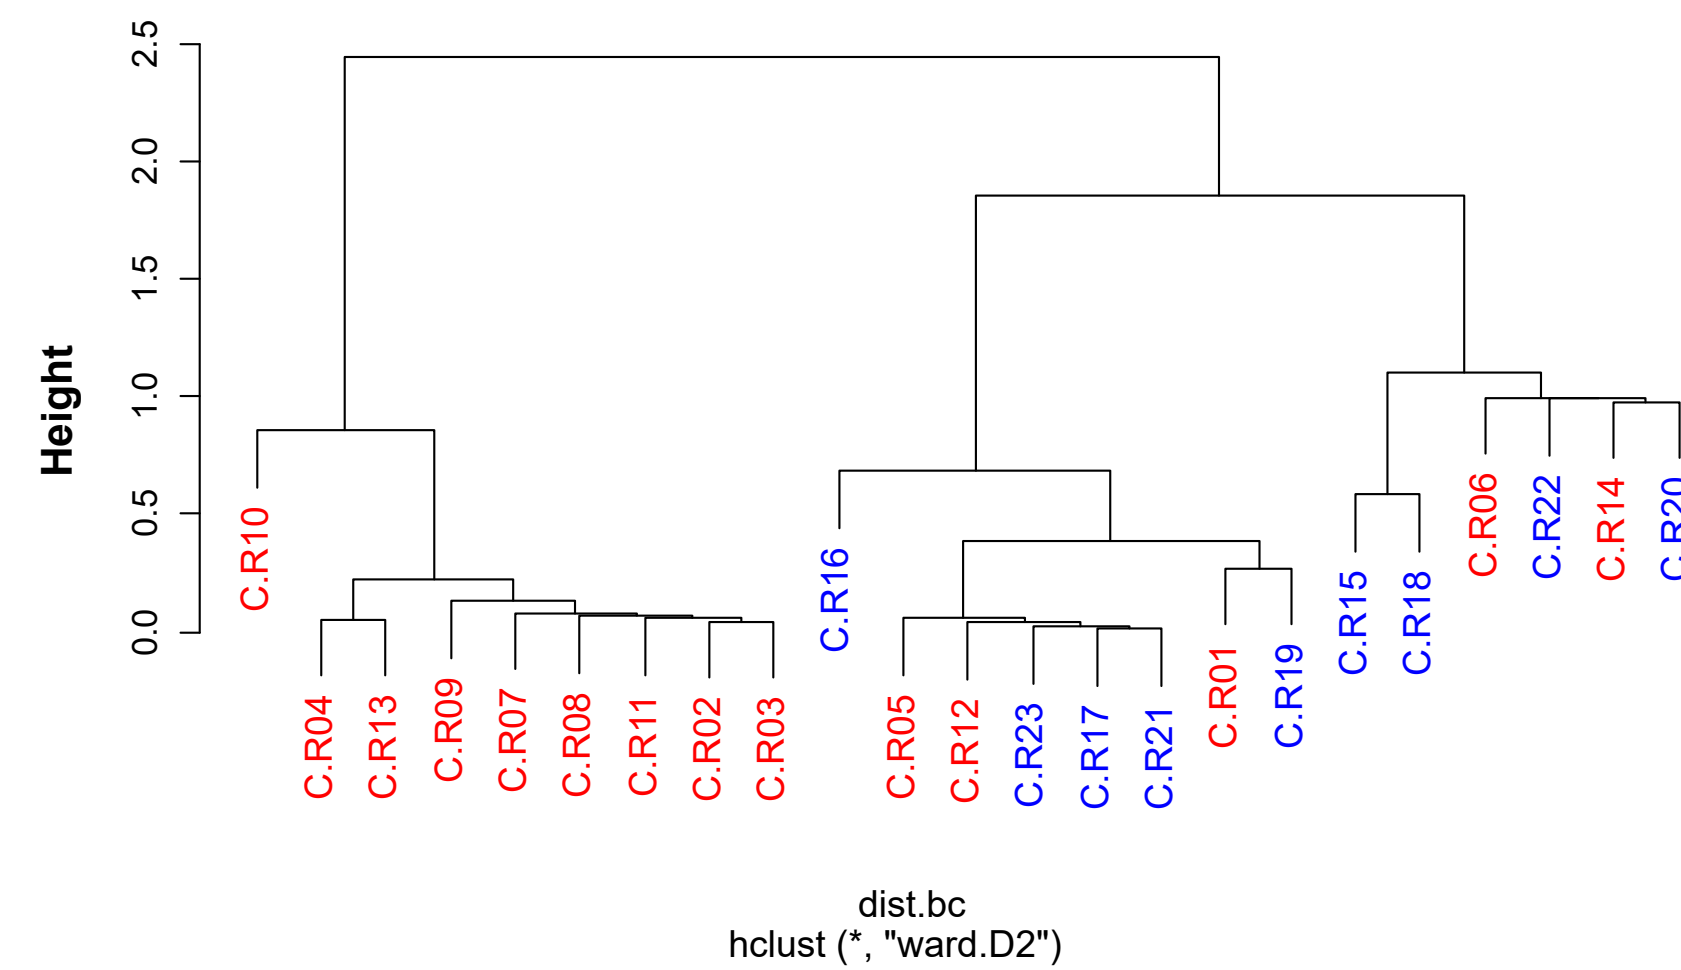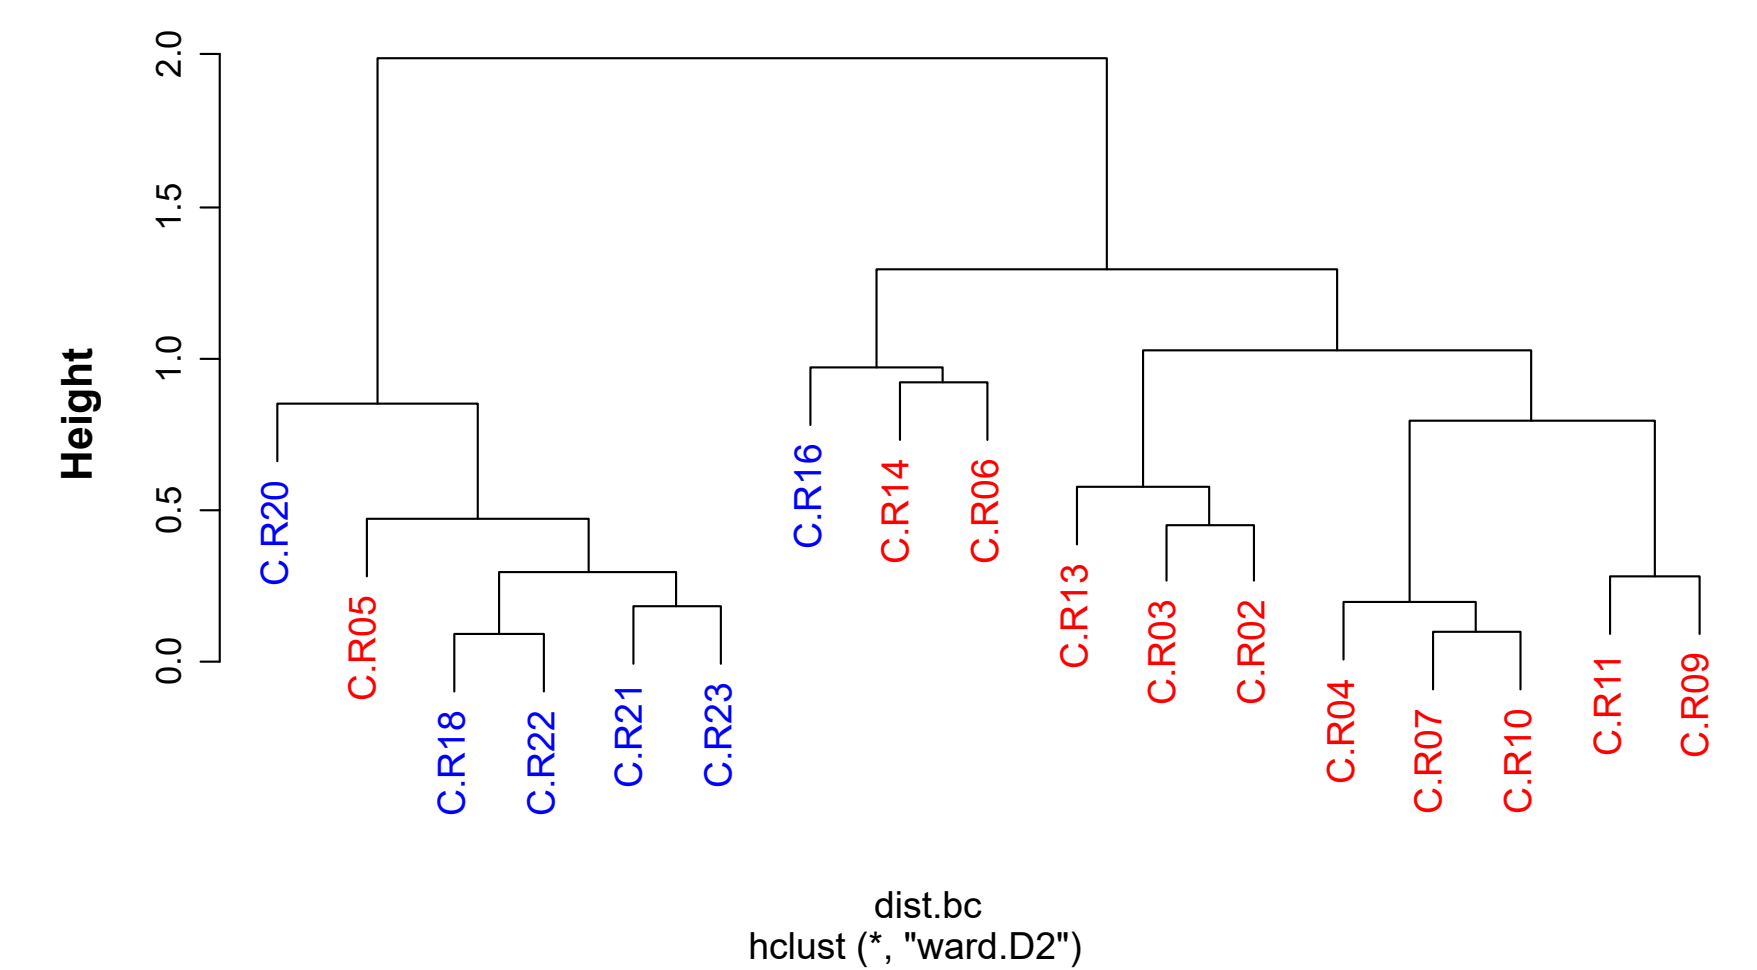

Source: https://www.biorxiv.org/content/biorxiv/early/2022/03/14/2022.03.14.484326.full.pdf
