# Supplementary material for: Revealing the microbial heritage of traditional Brazilian cheeses through metagenomics
Source: bioRxiv or medRxiv preprint supplement (doi:10.1101/2022.03.14.484326), 2022-03-14
Supplement: Supplementary file [file media-4.pdf]

# Potential new species

(A) *Streptococcus*

(B) *Brevibacterium*

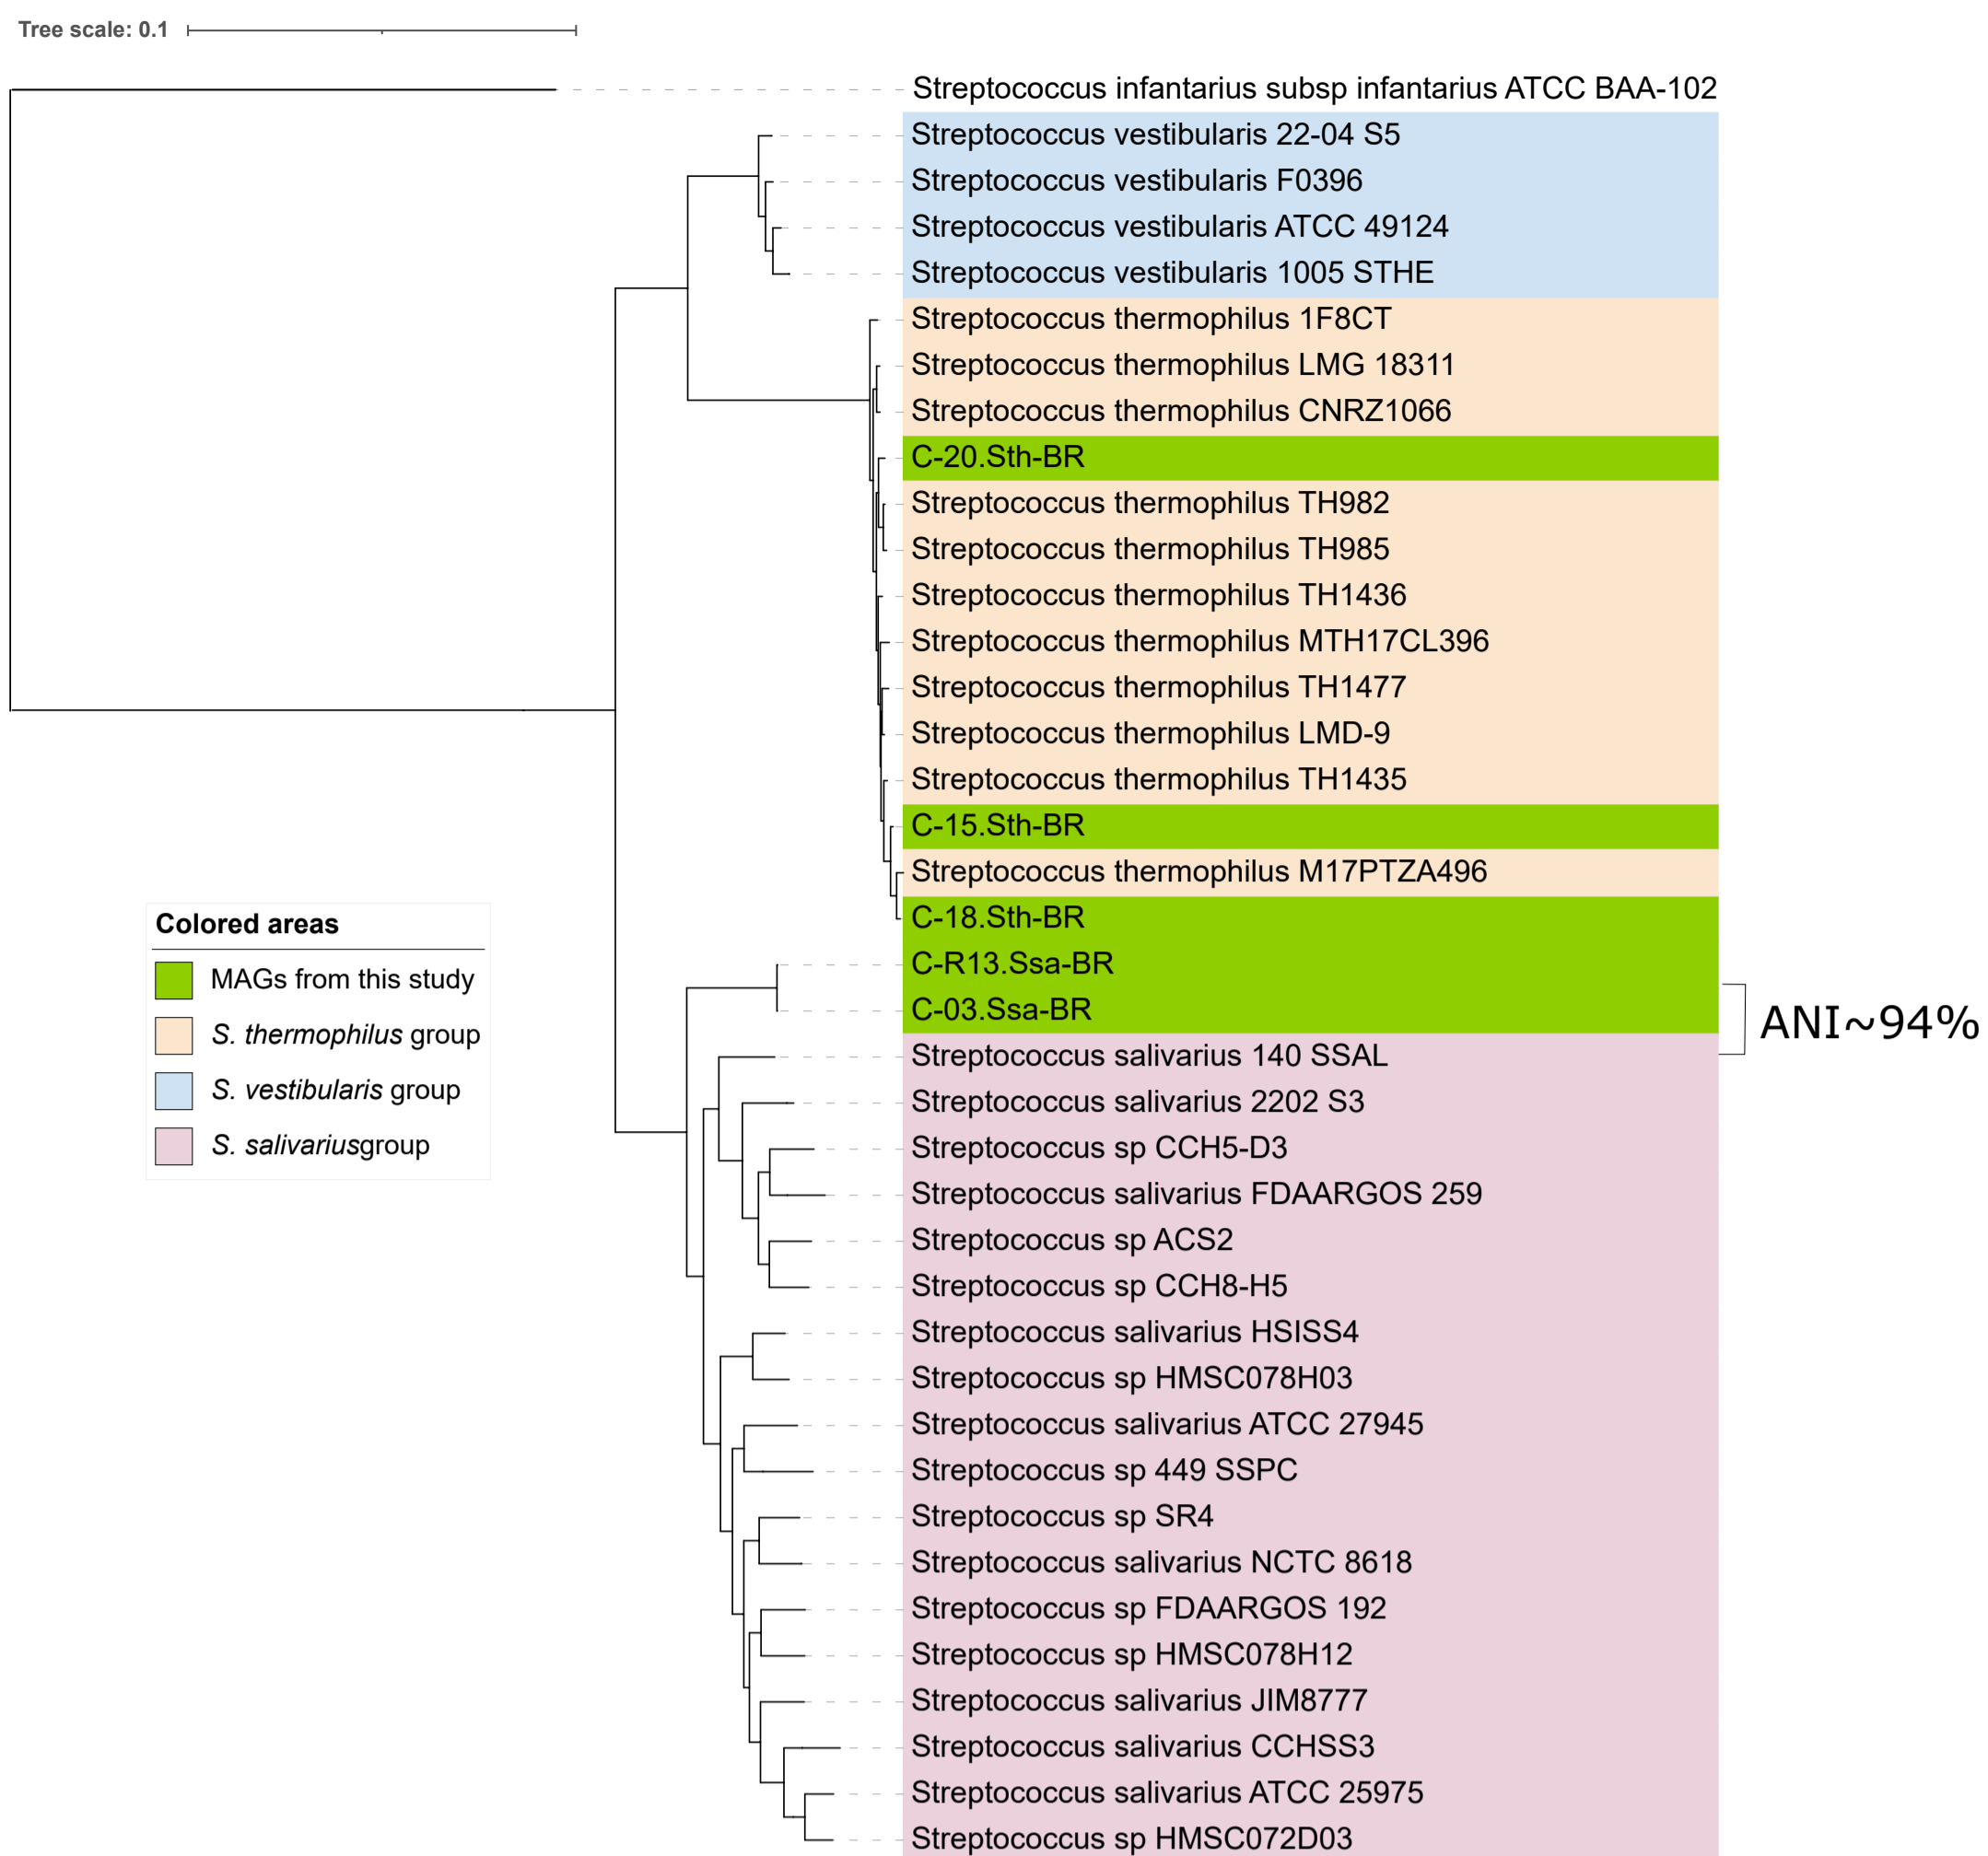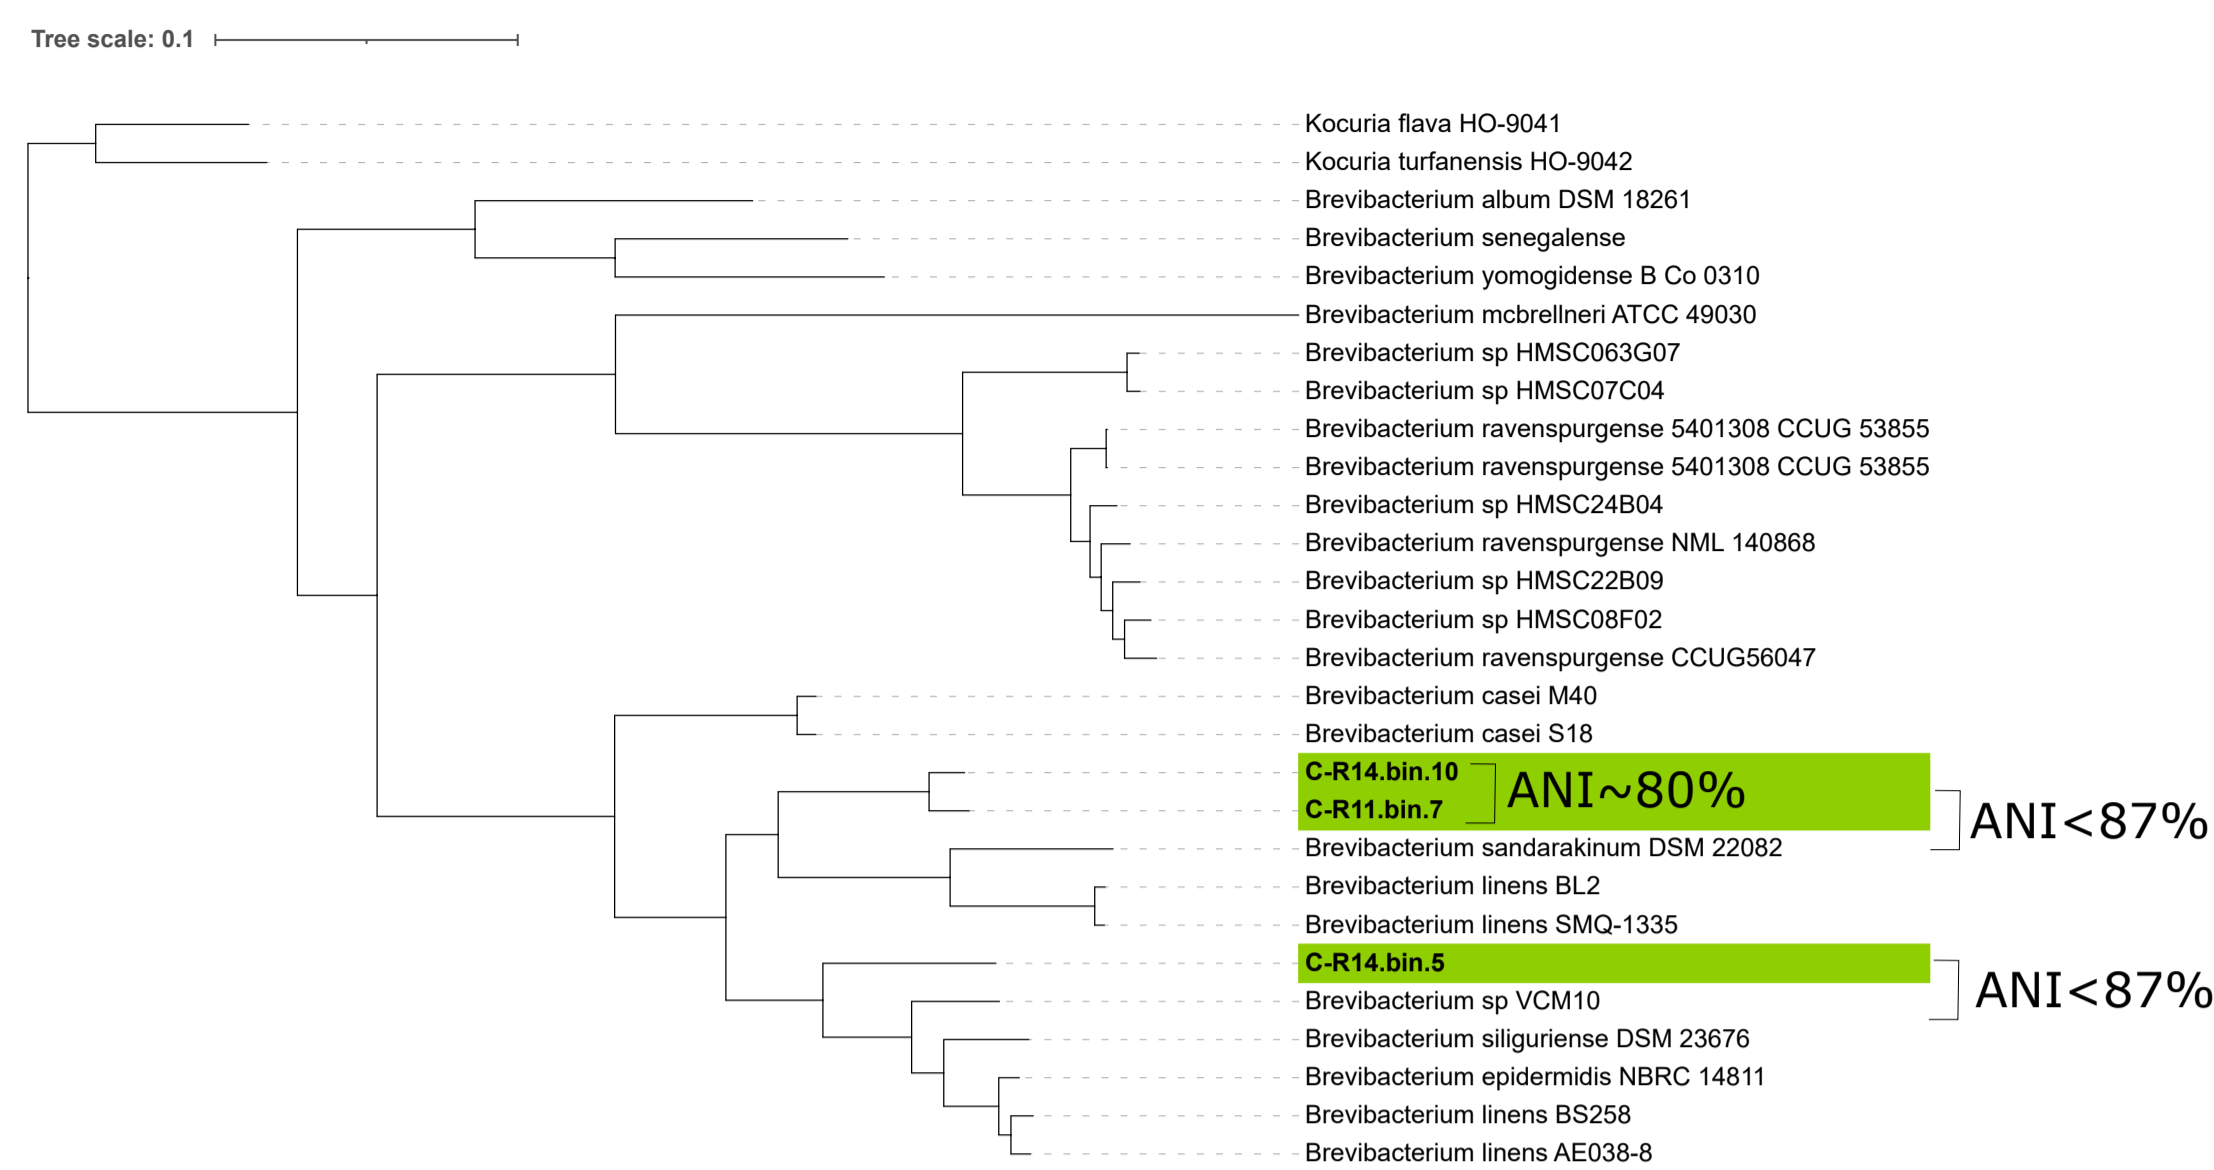

(C) *Corynebacterium*

(D) *Lactobacillus*

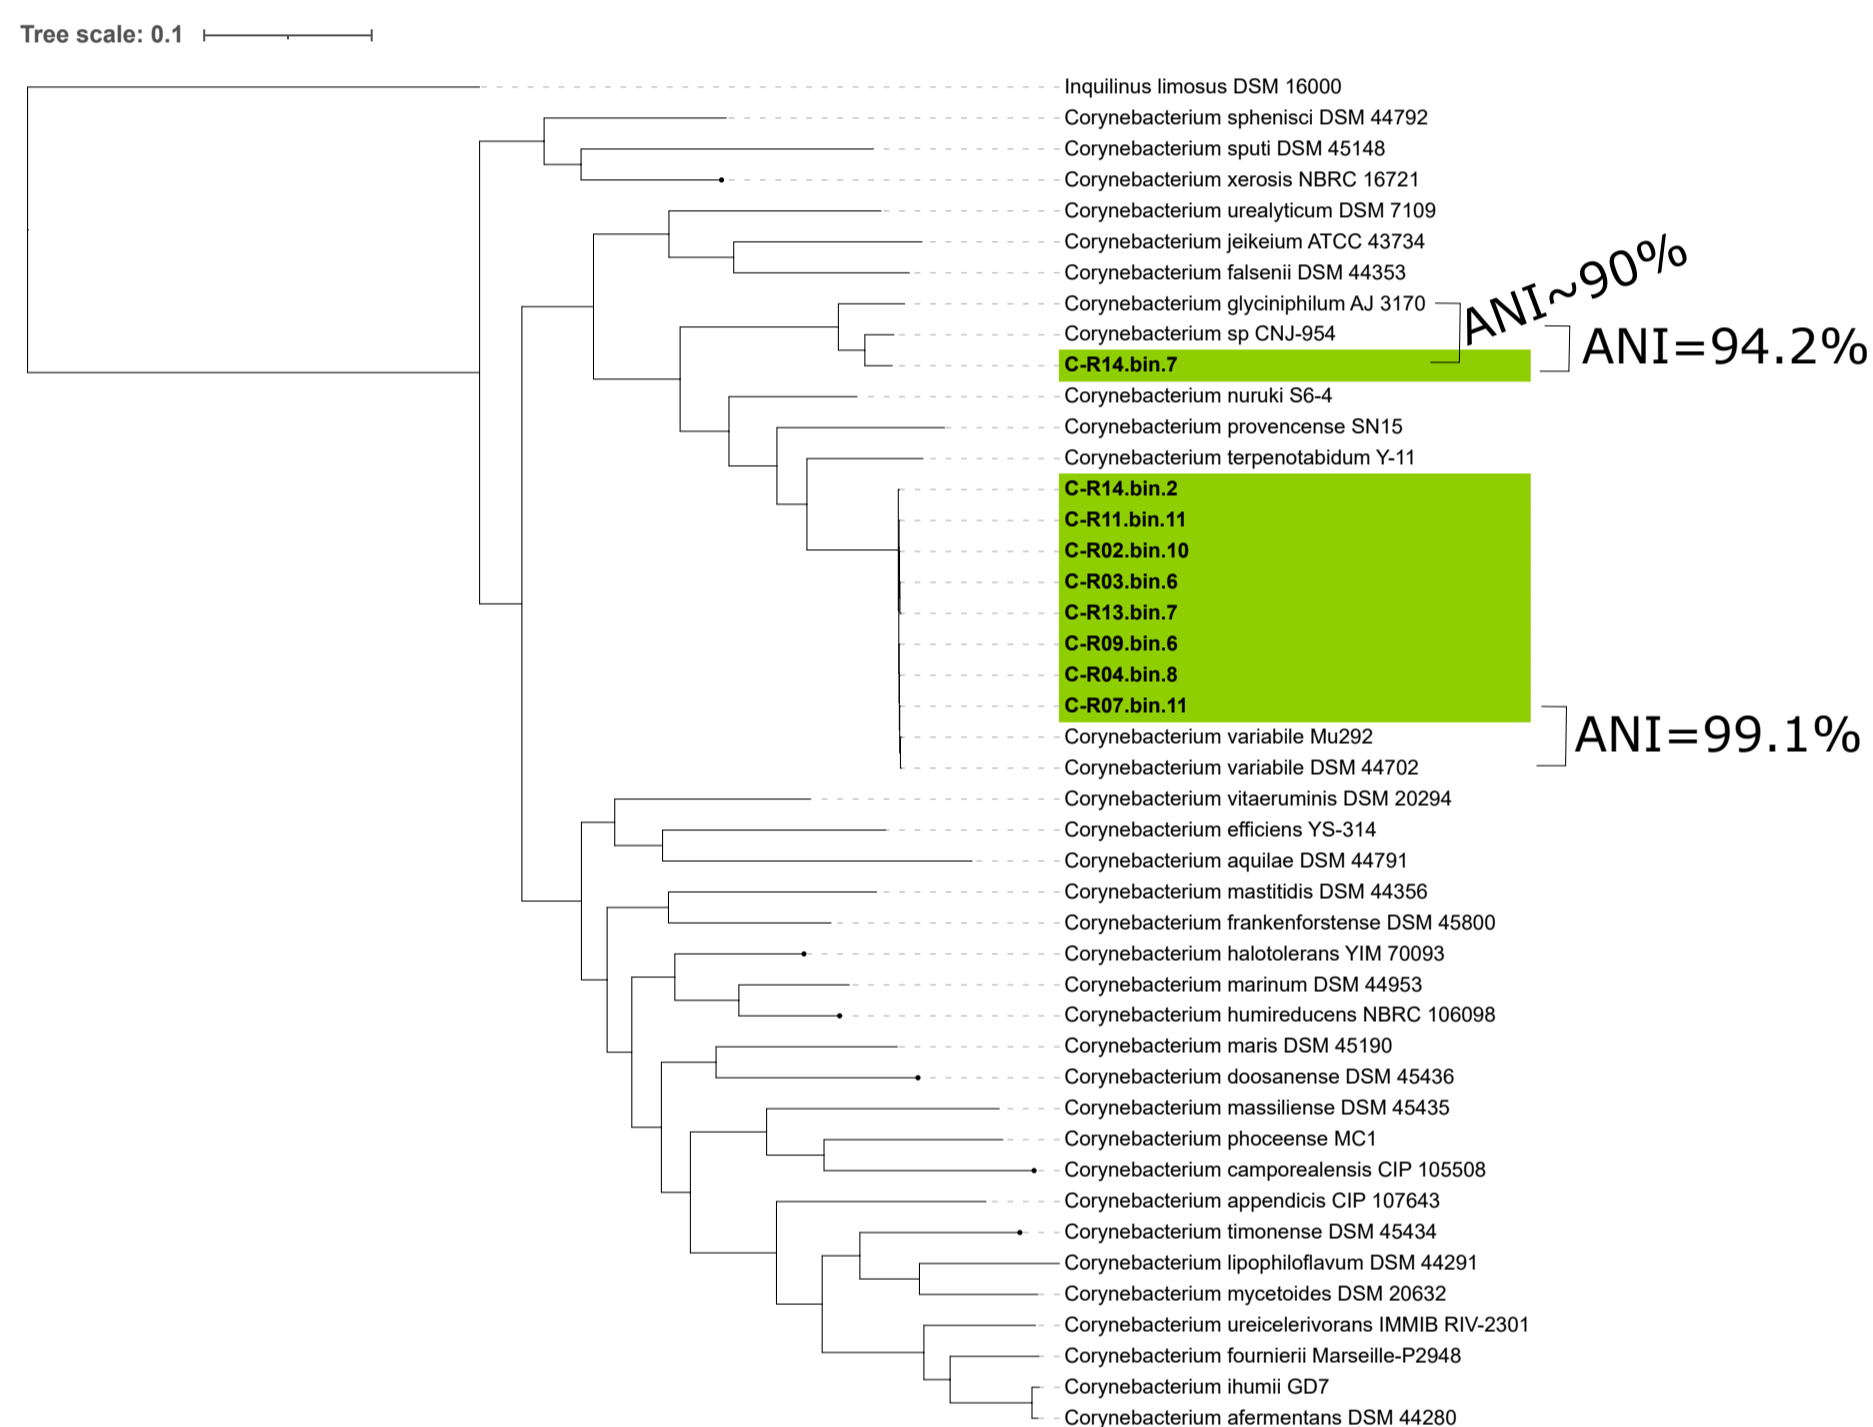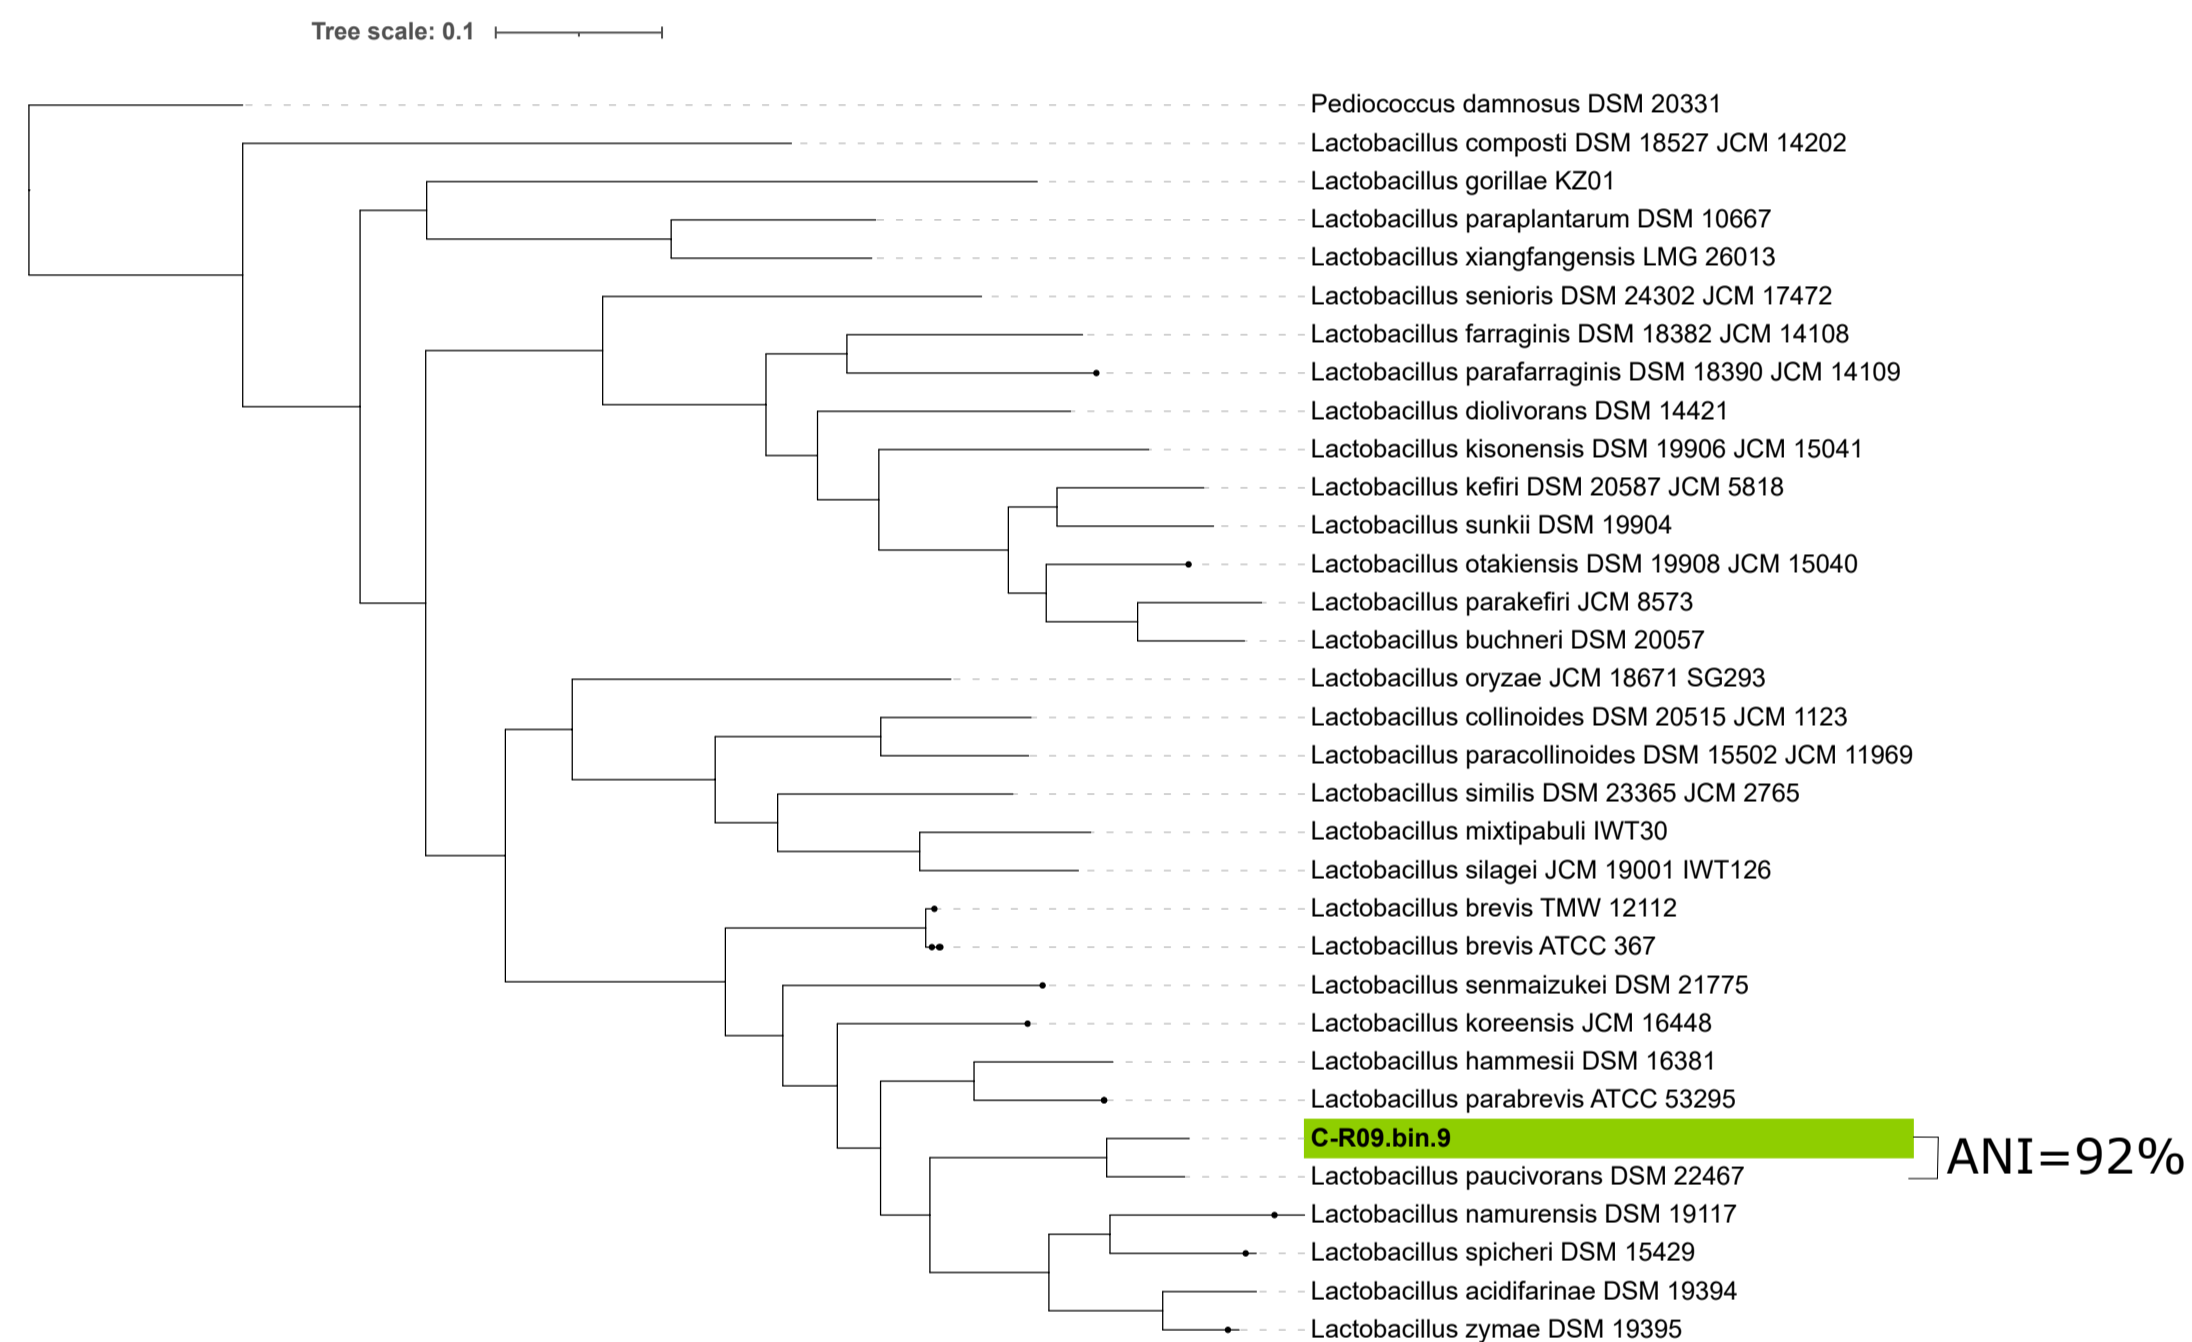

(E) *Microbacterium*

(F) Micrococcaceae family

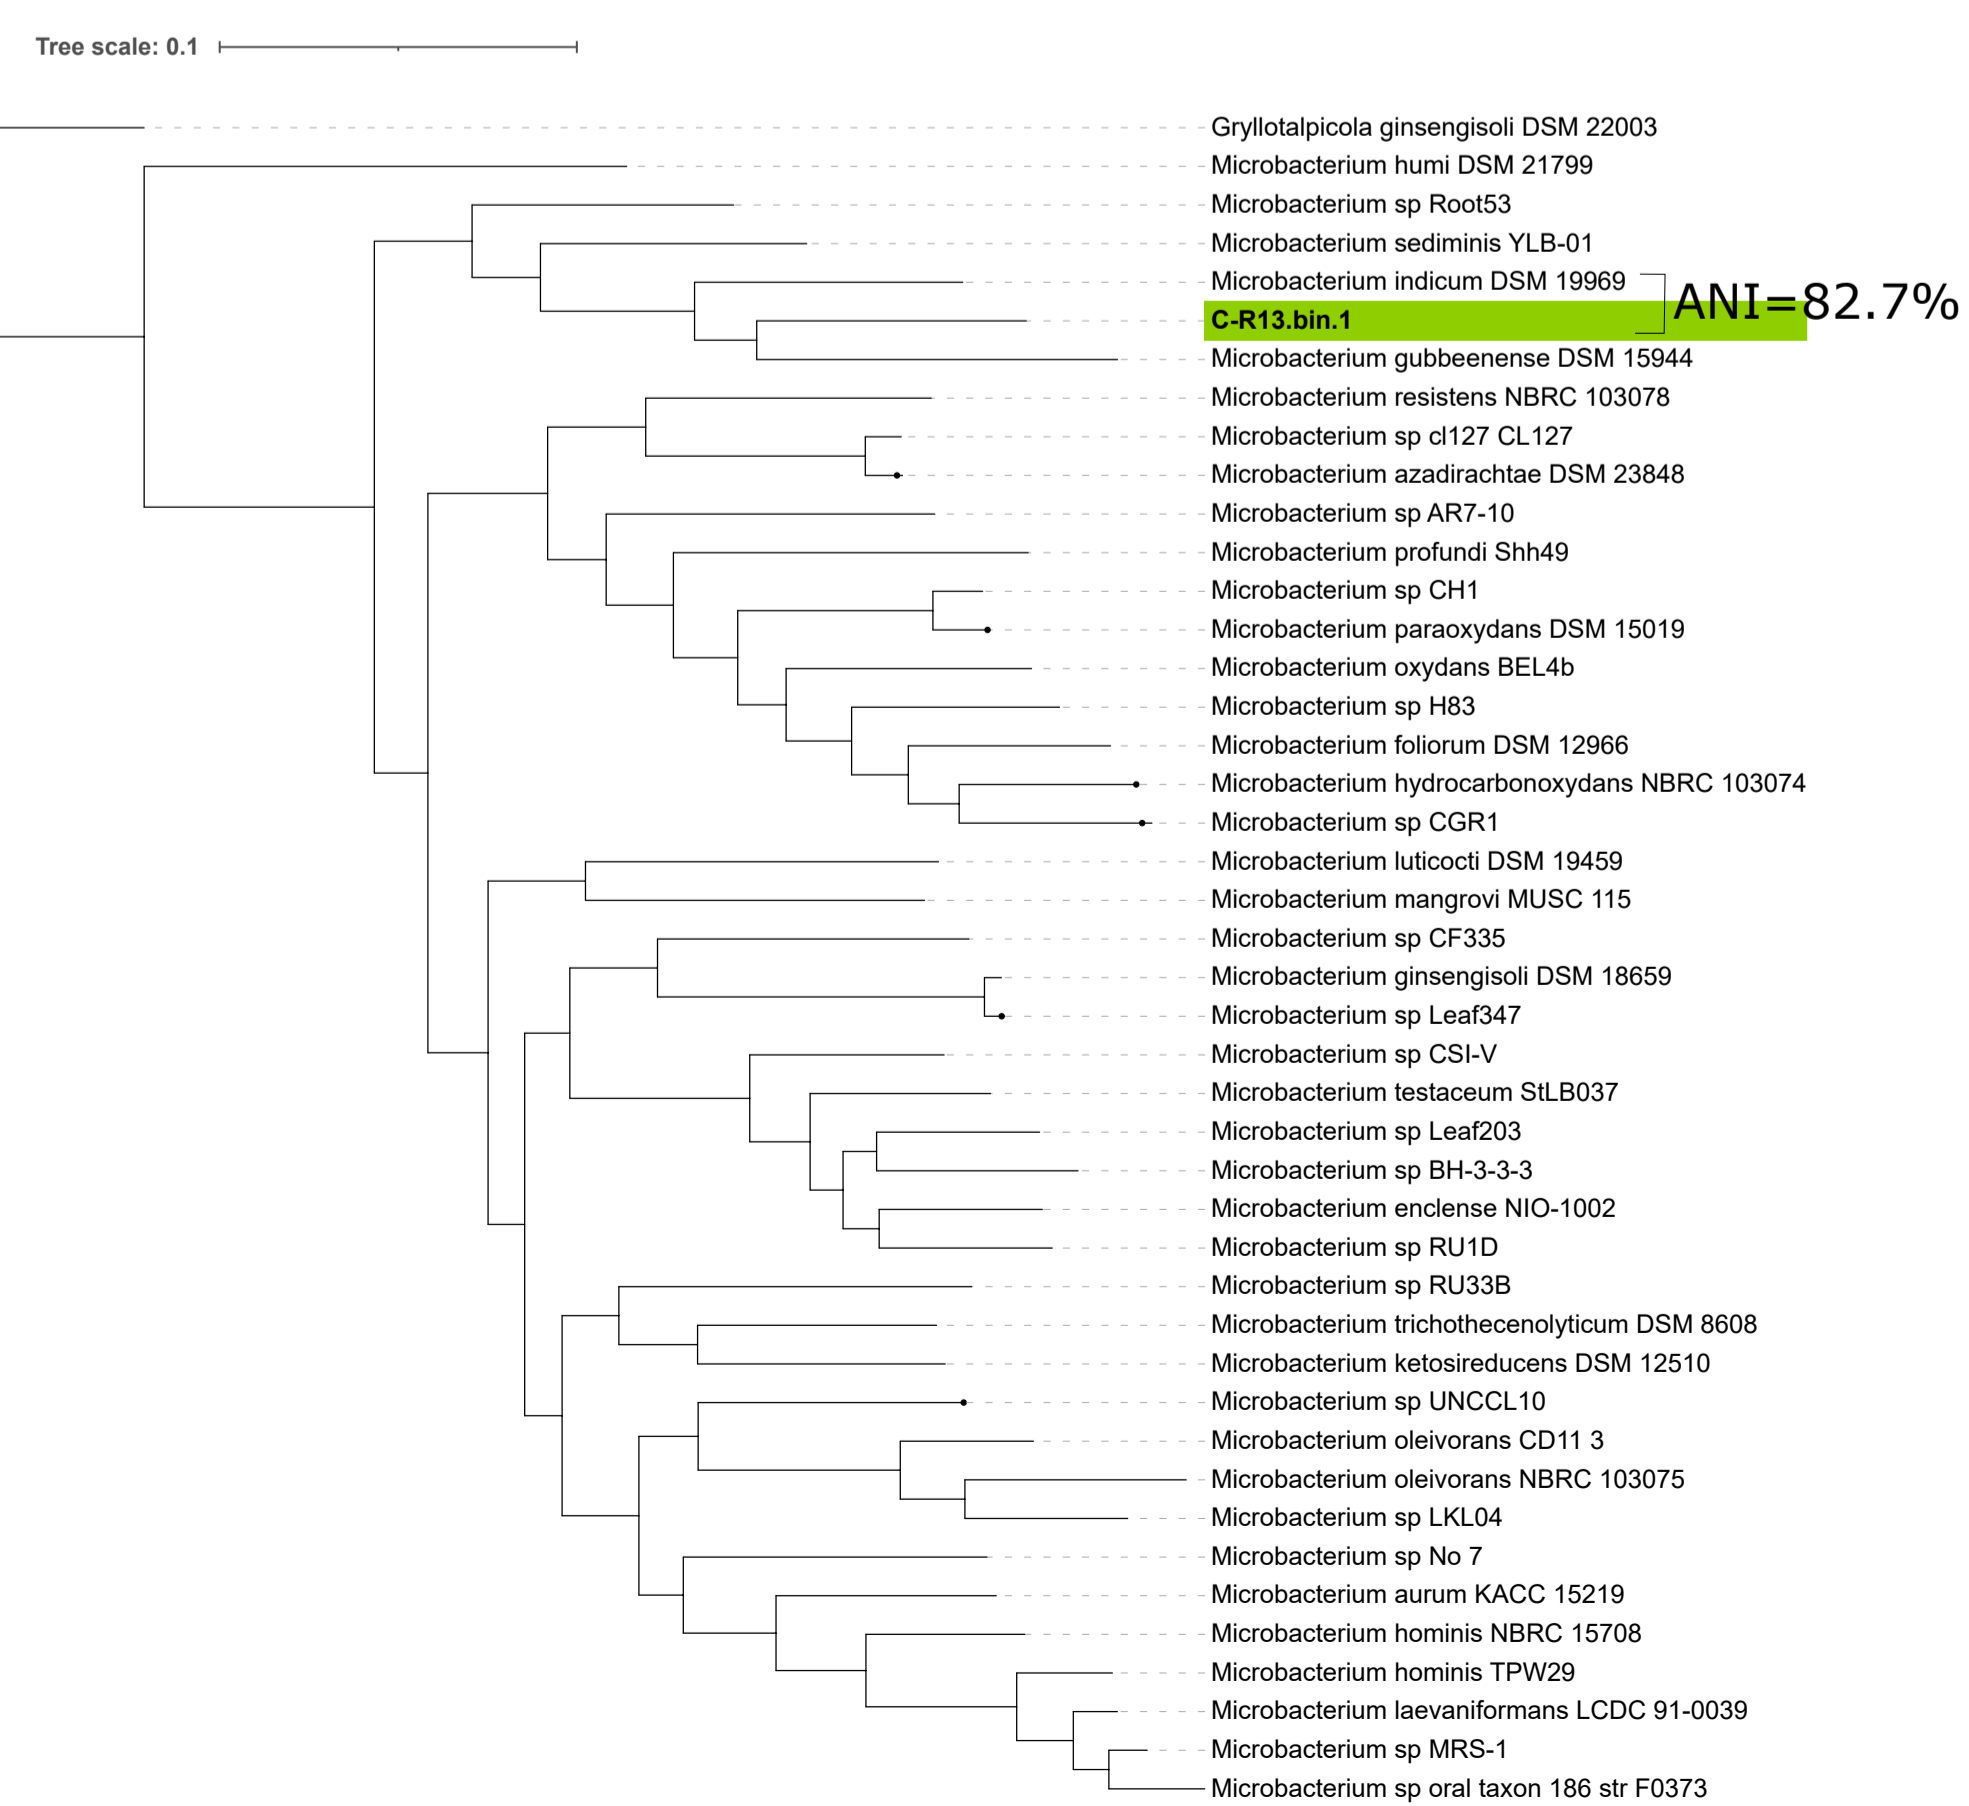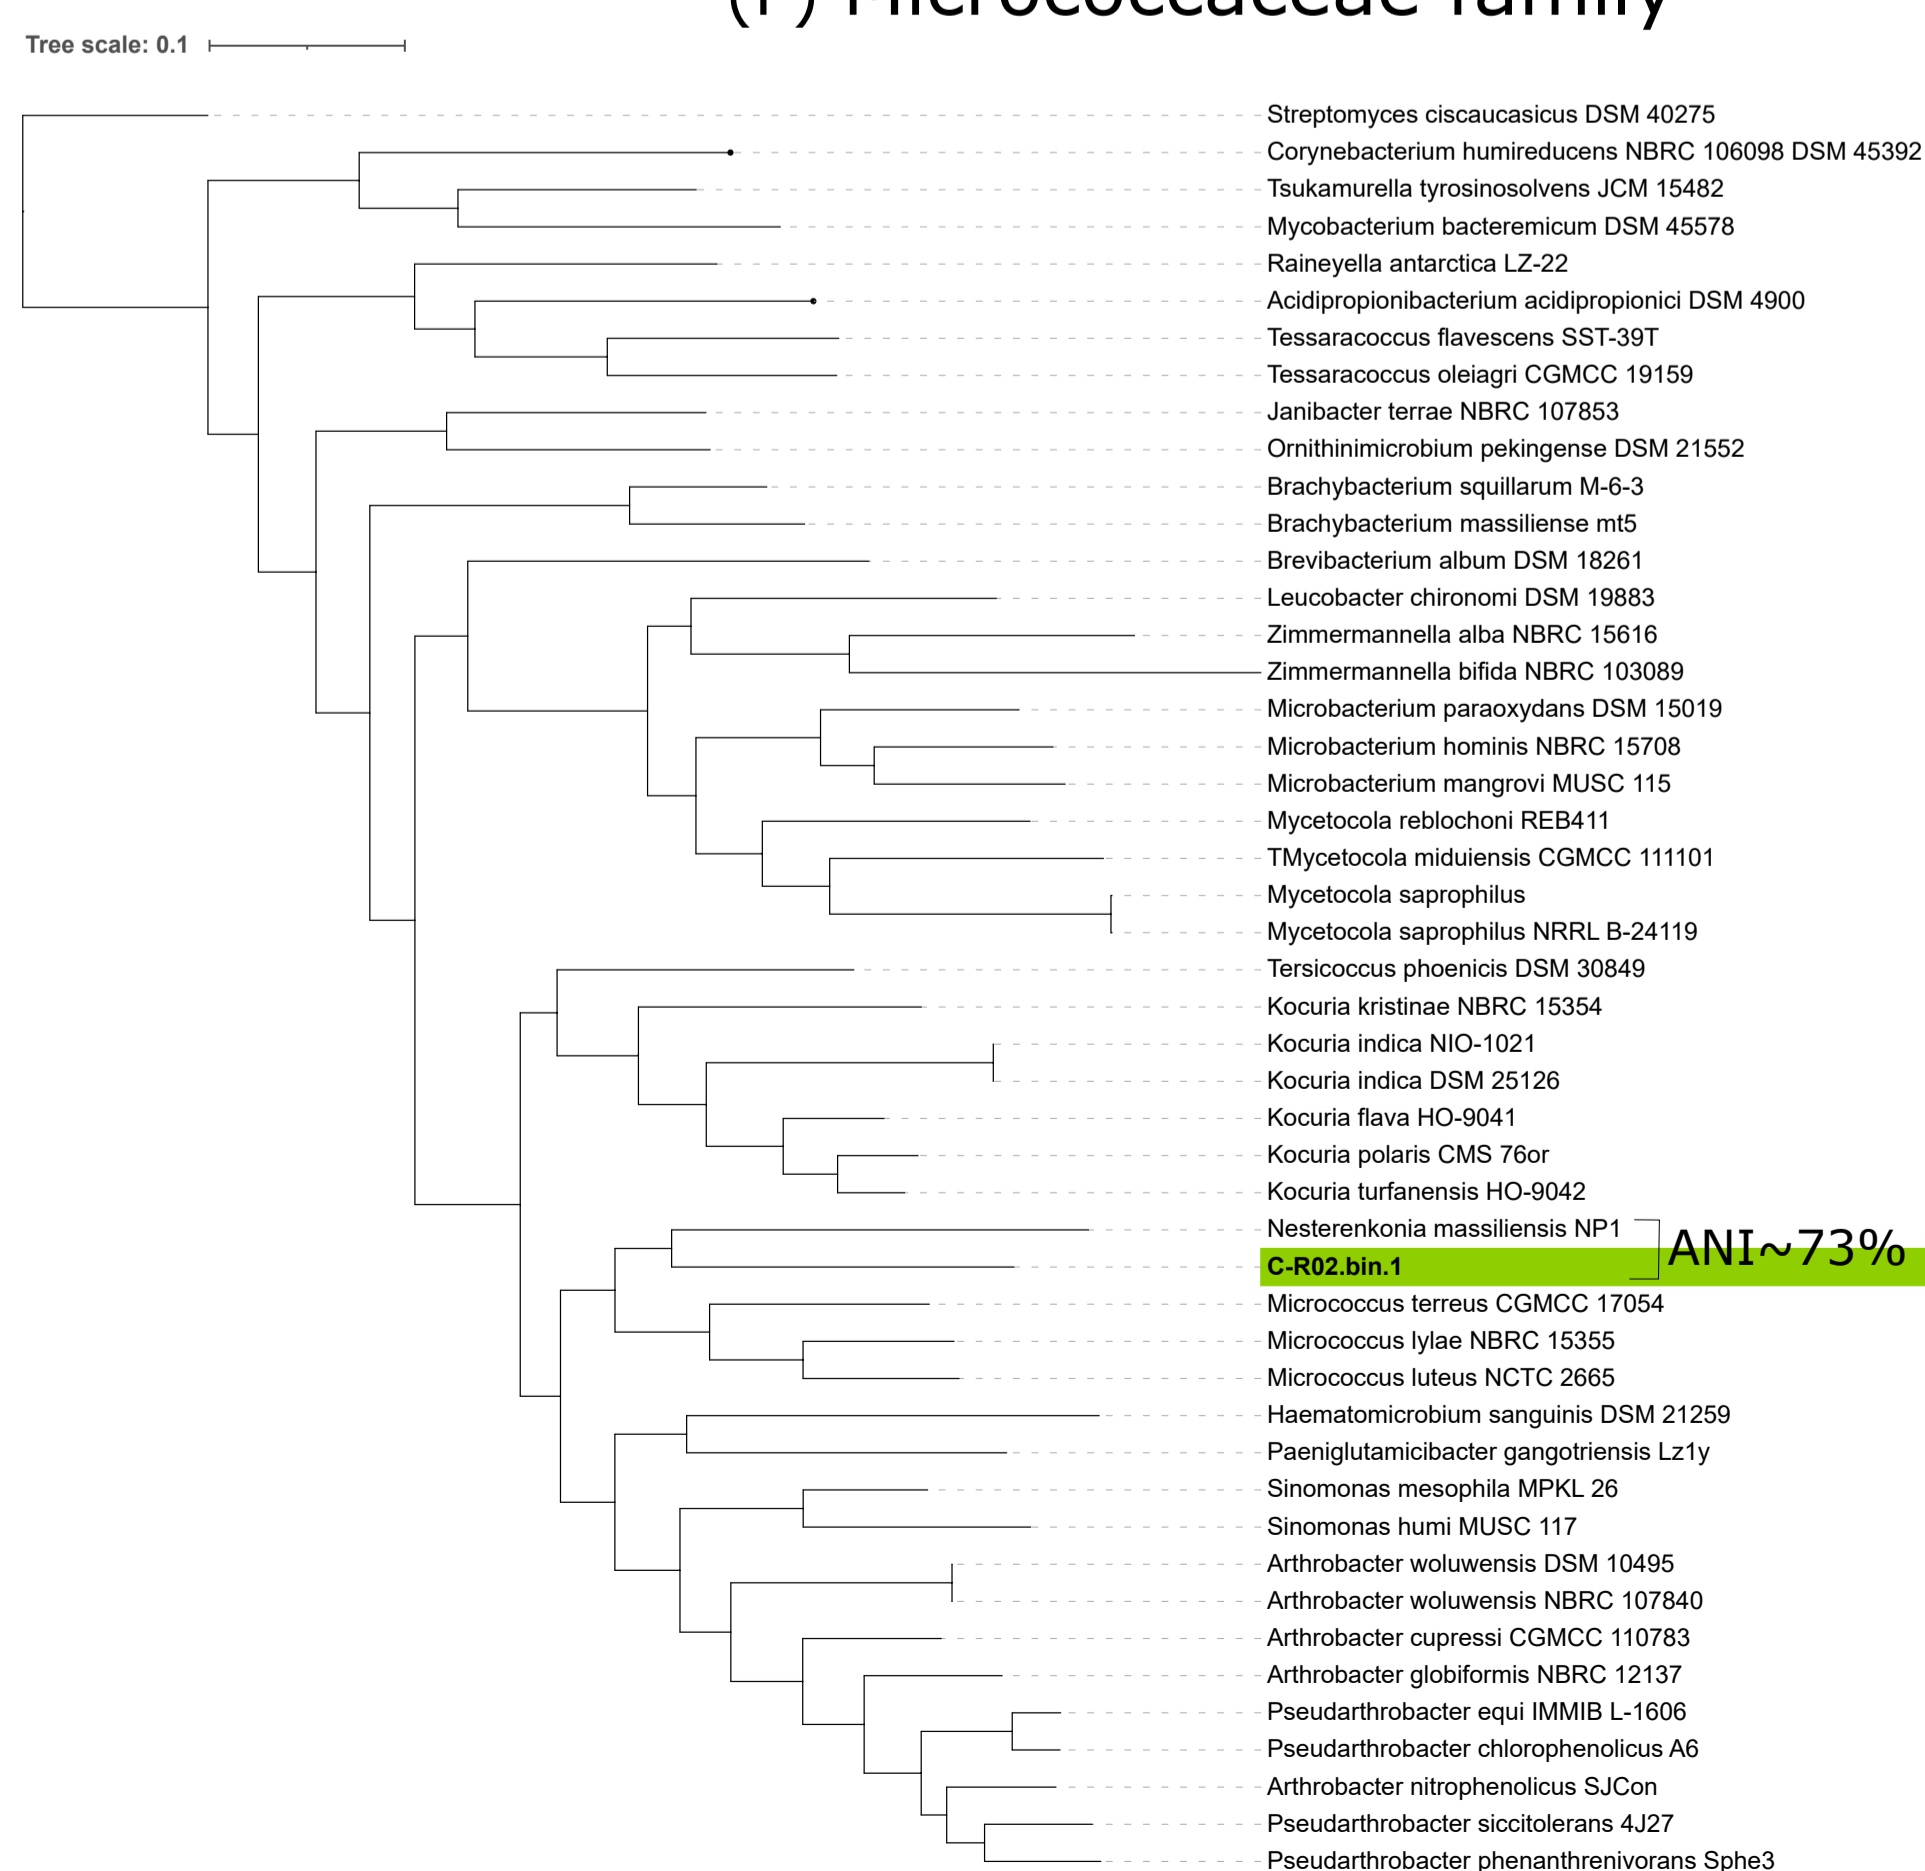

# Potential new genera
